# Supplementary material for: Colonic Mucosal Epigenome and Microbiome Development in Children and Adolescents
Source: J Immunol Res. 2016 Feb 23;2016:9170162. doi: 10.1155/2016/9170162 (PMC4781967; doi:10.1155/2016/9170162)
Supplement: Supplementary file 1 — These tables (1–7) contain the developmentally shifting, and microbiome abundance linked CpG sites, which are highlighted within this publication. [file 9170162.f1.xls]

## Sheet: Supplementary Table 1
CpG loci where DNA methylation negatively correlated with age (p<0.05) and methylation change was more than 10% between the youngest and oldest child in the cohort
Coordinate (GRCh37/hg19)	Probe	Methylation change (%)	Spearman r	p-value	UCSC_RefGene_Name	UCSC_RefGene_Accession	UCSC_RefGene_Group
chr1:115866441-115866441	cg27291710	-15.4703	-0.49	0.0217	NGF	NM_002506	5'UTR				DMRs (2 or more CpGs meeting selection criteria within 15kb) are highlighted; adjacent ones with different colors
chr1:13522252-13522252	cg11999044	-11.5008	-0.45	0.037	PRAMEF21;PRAMEF20	NM_001100114;NM_001099852	1stExon;Body
chr1:146543596-146543596	cg26152038	-11.2579	-0.49	0.0197
chr1:147956744-147956744	cg23350716	-20.2689	-0.46	0.0305	PPIAL4B;PPIAL4A	NM_001143883;NM_178230	TSS1500;TSS1500
chr1:154839813-154839813	cg06221963	-23.2367	-0.52	0.0141	KCNN3	NM_002249	Body
chr1:154839909-154839909	cg09359103	-20.653	-0.6	0.0032	KCNN3	NM_002249	Body
chr1:154839983-154839983	cg16680214	-10.5034	-0.56	0.0072	KCNN3	NM_002249	Body
chr1:155764892-155764892	cg07963046	-11.2007	-0.49	0.0197	GON4L;GON4L	NM_032292;NM_001037533	Body;Body
chr1:155931763-155931763	cg13921921	-10.7995	-0.48	0.0239	ARHGEF2;ARHGEF2;ARHGEF2	NM_004723;NM_001162383;NM_001162384	Body;Body;Body
chr1:156548201-156548201	cg21010646	-10.8483	-0.63	0.0017	TTC24	NM_001105669	TSS1500
chr1:159556997-159556997	cg05919685	-14.5552	-0.44	0.0389	APCS	NM_001639	TSS1500
chr1:163037784-163037784	cg01367097	-16.1248	-0.51	0.0142	RGS4;RGS4;RGS4	NM_001102445;NM_001113381;NM_005613	TSS1500;TSS1500;TSS1500
chr1:171045267-171045267	cg01942971	-11.2222	-0.48	0.0245
chr1:171283203-171283203	cg21183846	-18.588	-0.44	0.0398	FMO4	NM_002022	TSS1500
chr1:17308303-17308303	cg10201923	-11.8308	-0.44	0.0409	MFAP2;MFAP2;MFAP2;MFAP2	NM_002403;NM_001135247;NM_017459;NM_001135248	TSS1500;TSS1500;TSS1500;TSS1500
chr1:17633681-17633681	cg23228178	-10.0122	-0.48	0.0253	PADI4	NM_012387	TSS1500
chr1:19030288-19030288	cg20932535	-14.8234	-0.46	0.031	PAX7;PAX7;PAX7	NM_013945;NM_002584;NM_001135254	Body;Body;Body
chr1:196485513-196485513	cg19503341	-10.1463	-0.6	0.0033	KCNT2	NM_198503	Body
chr1:196855851-196855851	cg11793499	-14.2987	0.44	0.0407	CFHR4	NM_006684	TSS1500
chr1:202172867-202172867	cg05044291	-20.0228	-0.48	0.0249	LGR6;LGR6	NM_021636;NM_001017403	TSS200;Body
chr1:205537833-205537833	cg03061435	-15.2999	-0.55	0.0081	MFSD4	NM_181644	TSS1500
chr1:205537837-205537837	cg03585778	-11.7618	-0.53	0.0105	MFSD4	NM_181644	TSS1500
chr1:205539221-205539221	cg15012468	-15.7049	-0.56	0.0067	MFSD4	NM_181644	Body
chr1:205641542-205641542	cg17723122	-16.2382	-0.57	0.0058	SLC45A3	NM_033102	5'UTR
chr1:208171413-208171413	cg15112910	-10.6635	-0.61	0.0023
chr1:213190571-213190571	cg21951459	-11.9699	-0.63	0.0018	ANGEL2	NM_144567	TSS1500
chr1:21877576-21877576	cg12047425	-10.7301	-0.5	0.0183	ALPL;ALPL	NM_000478;NM_001127501	5'UTR;TSS1500
chr1:21877579-21877579	cg06346857	-11.4885	-0.51	0.0159	ALPL;ALPL	NM_000478;NM_001127501	5'UTR;TSS1500
chr1:21877592-21877592	cg22506534	-12.1673	-0.45	0.0359	ALPL;ALPL	NM_000478;NM_001127501	5'UTR;TSS1500
chr1:219749669-219749669	cg06811732	-10.0434	-0.42	0.0488
chr1:221335745-221335745	cg15965383	-11.0239	-0.47	0.0285
chr1:22466137-22466137	cg03519931	-15.5165	-0.47	0.0276	WNT4	NM_030761	Body
chr1:229374634-229374634	cg20800892	-15.3116	-0.55	0.0084
chr1:236555214-236555214	cg26513818	-18.3515	-0.44	0.0409
chr1:24171674-24171674	cg17085844	-13.1607	0.53	0.012	FUCA1	NM_000147	3'UTR
chr1:242097870-242097870	cg24546683	-10.2168	-0.46	0.0296
chr1:242767942-242767942	cg06903917	-10.0168	-0.5	0.0174
chr1:244466428-244466428	cg09828411	-12.2559	-0.47	0.0287
chr1:248366883-248366883	cg07598464	-10.2747	-0.51	0.0161	OR2M3	NM_001004689	1stExon
chr1:2838930-2838930	cg24057775	-10.482	-0.55	0.0077
chr1:3192343-3192343	cg12660813	-13.906	-0.43	0.0465	PRDM16;PRDM16	NM_022114;NM_199454	Body;Body
chr1:3575674-3575674	cg04137576	-16.9316	-0.52	0.0131	TP73	NM_005427	5'UTR
chr1:48703725-48703725	cg09869595	-13.4316	-0.44	0.0381	SLC5A9;SLC5A9	NM_001011547;NM_001135181	Body;Body
chr1:567501-567501	cg23917638	-18.8223	-0.43	0.0481	MIR1977	NR_031741	TSS1500
chr1:57490967-57490967	cg13060236	-10.4439	-0.48	0.023	DAB1	NM_021080	Body
chr1:6111835-6111835	cg22235088	-14.2068	-0.57	0.0054	KCNAB2;KCNAB2	NM_003636;NM_172130	Body;Body
chr1:62102363-62102363	cg24870729	-14.1714	0.43	0.0465
chr1:65209572-65209572	cg11653179	-13.7664	-0.47	0.0285	RAVER2	NM_018211	TSS1500
chr1:76189801-76189801	cg03433033	-10.7382	-0.47	0.0257	ACADM;ACADM	NM_000016;NM_001127328	TSS1500;TSS1500
chr1:7891116-7891116	cg11668188	-10.2863	0.46	0.0317	PER3	NM_016831	Body
chr1:8960134-8960134	cg20510033	-12.5151	-0.59	0.0042
chr1:97737509-97737509	cg23057232	-12.3543	-0.56	0.0067	DPYD	NM_000110	Body
chr10:100680681-100680681	cg06408053	-14.1475	-0.62	0.0019	HPSE2;HPSE2;HPSE2;HPSE2	NM_001166244;NM_001166245;NM_021828;NM_001166246	Body;Body;Body;Body
chr10:11187764-11187764	cg19368016	-14.3282	-0.46	0.0293	CUGBP2;CUGBP2	NM_006561;NM_001025077	Body;Body
chr10:128039279-128039279	cg09866104	-10.8363	-0.65	0.0011	ADAM12;ADAM12	NM_003474;NM_021641	Body;Body
chr10:131514331-131514331	cg27429313	-12.6169	-0.5	0.0184	MGMT	NM_002412	Body
chr10:133909949-133909949	cg18650367	-29.8593	-0.44	0.0418
chr10:134754396-134754396	cg24411972	-12.2824	-0.52	0.0134	C10orf93	NM_173572	Body
chr10:134773853-134773853	cg19090784	-15.3581	-0.45	0.0359
chr10:135032154-135032154	cg00357546	-11.9965	-0.5	0.0186	KNDC1	NM_152643	Body
chr10:135340467-135340467	cg09208540	-14.6301	-0.55	0.0085	CYP2E1	NM_000773	TSS1500
chr10:25797307-25797307	cg14506260	-15.8045	-0.47	0.0274	GPR158	NM_020752	Body
chr10:27389879-27389879	cg07450214	-10.615	-0.52	0.0128	ANKRD26	NM_014915	TSS1500
chr10:28200623-28200623	cg23696593	-15.2915	-0.6	0.0032	ARMC4	NM_018076	Body
chr10:28956088-28956088	cg17179923	-11.5454	-0.53	0.0121
chr10:29439573-29439573	cg07483709	-10.2913	-0.45	0.0352
chr10:31101116-31101116	cg03127349	-16.1512	-0.49	0.0217
chr10:33612892-33612892	cg17425818	-10.8744	-0.44	0.0421	NRP1;NRP1;NRP1	NM_001024628;NM_003873;NM_001024629	Body;Body;Body
chr10:44503867-44503867	cg18666379	-14.3615	-0.49	0.02
chr10:46171106-46171106	cg06059483	-13.7736	-0.44	0.0415
chr10:49832794-49832794	cg20198183	-15.8164	-0.52	0.0135
chr10:50329828-50329828	cg24385652	-11.786	-0.48	0.0241
chr10:50826395-50826395	cg12799846	-10.2235	-0.5	0.0174	CHAT;CHAT;CHAT;CHAT;CHAT;CHAT;CHAT	NM_020984;NM_020549;NM_001142933;NM_020985;NM_001142929;NM_001142934;NM_020986	Body;Body;Body;Body;Body;Body;Body
chr10:51572113-51572113	cg23359810	-10.6417	-0.53	0.0117	NCOA4;NCOA4;NCOA4;NCOA4	NM_001145263;NM_001145261;NM_005437;NM_001145260	5'UTR;Body;TSS1500;Body
chr10:52363132-52363132	cg20014988	-12.6544	-0.55	0.0086	SGMS1	NM_147156	5'UTR
chr10:530714-530714	cg16977735	-14.3167	-0.46	0.0326	DIP2C	NM_014974	Body
chr10:530805-530805	cg00590260	-11.8528	-0.52	0.0123	DIP2C	NM_014974	Body
chr10:530951-530951	cg00219169	-15.4168	-0.45	0.0365	DIP2C	NM_014974	Body
chr10:531098-531098	cg09955645	-12.6371	-0.48	0.0247	DIP2C	NM_014974	Body
chr10:531569-531569	cg25712088	-11.4215	-0.48	0.0232	DIP2C	NM_014974	Body
chr10:64005030-64005030	cg05586384	-10.468	-0.69	0.0004	RTKN2	NM_145307	Body
chr10:65771748-65771748	cg12498395	-13.5384	-0.53	0.0117
chr10:6941696-6941696	cg04854908	-13.6872	-0.58	0.0045
chr10:72221844-72221844	cg05240350	-11.885	-0.63	0.0017
chr10:77472158-77472158	cg24369728	-15.1543	0.47	0.0278
chr10:81583959-81583959	cg01423845	-30.8758	-0.43	0.044
chr10:91408027-91408027	cg23204113	-14.3554	-0.48	0.023
chr10:95883202-95883202	cg07336123	-16.5199	-0.44	0.0427	PLCE1;PLCE1	NM_001165979;NM_016341	Body;Body
chr11:102401438-102401438	cg25511807	-24.9809	-0.53	0.0114	MMP7;MMP7	NM_002423;NM_002423	1stExon;5'UTR
chr11:110108538-110108538	cg02243606	-12.6781	-0.57	0.0054	RDX	NM_002906	Body
chr11:12341664-12341664	cg24245601	-10.6139	-0.46	0.0321	MICALCL	NM_032867	Body
chr11:127811816-127811816	cg07344468	-10.5102	-0.43	0.0455
chr11:129080113-129080113	cg03610849	-10.566	-0.47	0.0285
chr11:129564373-129564373	cg19388930	-17.566	-0.44	0.0381
chr11:130183707-130183707	cg17993442	-15.6167	-0.48	0.0223	ZBTB44	NM_014155	5'UTR
chr11:133229994-133229994	cg07985589	-13.9575	-0.45	0.0336	OPCML	NM_001012393	Body
chr11:1392360-1392360	cg07236001	-11.4429	-0.47	0.0269
chr11:18270341-18270341	cg12907644	-19.0635	-0.55	0.0074	SAA2;SAA2	NM_030754;NM_001127380	TSS200;TSS200
chr11:18287647-18287647	cg15484375	-14.4246	-0.51	0.0161	SAA1;SAA1	NM_199161;NM_000331	TSS200;TSS200
chr11:1959051-1959051	cg09833701	-10.3078	-0.48	0.0237	TNNT3;TNNT3;TNNT3;TNNT3	NM_001042781;NM_006757;NM_001042780;NM_001042782	Body;Body;Body;Body
chr11:2154132-2154132	cg11717189	-10.3995	-0.45	0.0378	INS-IGF2;IGF2;IGF2;IGF2	NR_003512;NM_001007139;NM_000612;NM_001127598	Body;3'UTR;3'UTR;3'UTR
chr11:30034452-30034452	cg04063166	-11.9799	-0.47	0.0265	KCNA4	NM_002233	5'UTR
chr11:36469878-36469878	cg27218154	-10.0211	-0.43	0.0471	PRR5L;PRR5L;PRR5L;PRR5L	NM_024841;NM_001160167;NM_001160169;NM_001160168	Body;Body;Body;Body
chr11:44468028-44468028	cg01482969	-12.3284	-0.46	0.0296
chr11:44814303-44814303	cg24681086	-13.5523	-0.52	0.0136	TSPAN18	NM_130783	5'UTR
chr11:44855796-44855796	cg18395231	-13.025	-0.47	0.0257	TSPAN18	NM_130783	5'UTR
chr11:47256035-47256035	cg14943002	-11.3776	-0.45	0.0375	DDB2	NM_000107	Body
chr11:47420027-47420027	cg12965338	-10.2329	-0.47	0.0274
chr11:57158361-57158361	cg15357945	-11.4403	-0.58	0.0048	PRG2	NM_002728	TSS1500
chr11:60611862-60611862	cg19750116	-16.5595	-0.53	0.0116	CCDC86	NM_024098	Body
chr11:67764320-67764320	cg24974729	-39.8473	-0.53	0.0111	UNC93B1	NM_030930	Body
chr11:68762338-68762338	cg06532856	-10.5891	-0.46	0.0296
chr11:70917283-70917283	cg20170028	-20.276	-0.5	0.0166	SHANK2	NM_012309	5'UTR
chr11:70917533-70917533	cg07110405	-21.3077	-0.49	0.0192	SHANK2	NM_012309	5'UTR
chr11:71315863-71315863	cg10016024	-11.1497	-0.47	0.0265
chr11:733406-733406	cg06073535	-15.3275	-0.55	0.0074
chr11:788583-788583	cg24602560	-14.0512	-0.43	0.0468	CEND1	NM_016564	5'UTR
chr11:86529655-86529655	cg11873113	-20.7818	-0.51	0.0161
chr11:89957476-89957476	cg01693326	-18.274	-0.49	0.021	CHORDC1;CHORDC1	NM_012124;NM_001144073	TSS1500;TSS1500
chr11:94801827-94801827	cg14706107	-14.4242	-0.53	0.0106	SFRS2B;SFRS2B	NM_032102;NM_032102	1stExon;3'UTR
chr12:107976961-107976961	cg19939178	-10.2407	-0.45	0.0352	BTBD11;BTBD11	NM_001017523;NM_001018072	Body;Body
chr12:109531564-109531564	cg05509800	-10.0914	-0.49	0.0207	ALKBH2;ALKBH2;ALKBH2;ALKBH2;ALKBH2	NM_001145375;NR_026931;NR_026930;NM_001001655;NM_001145374	TSS1500;TSS1500;TSS1500;TSS1500;TSS1500
chr12:11036074-11036074	cg03218402	-21.8686	0.47	0.0259	PRH1;PRR4	NM_006250;NM_001098538	Body;Body
chr12:113305756-113305756	cg07668671	-13.0275	-0.43	0.0462	RPH3A;RPH3A	NM_001143854;NM_014954	Body;Body
chr12:114781410-114781410	cg15466176	-13.7427	-0.49	0.02
chr12:114855417-114855417	cg24700929	-10.0452	-0.43	0.0443
chr12:125810688-125810688	cg10520543	-17.7433	-0.44	0.0421	TMEM132B	NM_052907	TSS1500
chr12:131171031-131171031	cg05181941	-15.748	-0.52	0.0131
chr12:131171181-131171181	cg05375686	-16.81	-0.56	0.0065
chr12:131188247-131188247	cg18806660	-19.8239	-0.46	0.0329
chr12:132075216-132075216	cg21539678	-12.6802	-0.44	0.0409
chr12:132412438-132412438	cg00588090	-11.9389	-0.43	0.0455	PUS1;PUS1;PUS1	NM_001002019;NM_025215;NM_001002020	TSS1500;TSS1500;TSS1500
chr12:132663675-132663675	cg09828575	-15.9655	-0.55	0.0078
chr12:133177383-133177383	cg27612324	-12.7109	-0.56	0.0063
chr12:133177827-133177827	cg23591611	-11.3922	-0.49	0.0217
chr12:15955024-15955024	cg06097423	-13.5506	-0.57	0.0052
chr12:19417219-19417219	cg21435172	-10.0604	-0.43	0.0455	PLEKHA5;PLEKHA5	NM_001143821;NM_019012	Body;Body
chr12:1948648-1948648	cg24510285	-10.4488	-0.49	0.0207	CACNA2D4	NM_172364	Body
chr12:3833996-3833996	cg23849201	-10.2734	-0.55	0.0085	EFCAB4B;EFCAB4B;EFCAB4B	NM_001144959;NM_032680;NM_001144958	5'UTR;5'UTR;5'UTR
chr12:41085302-41085302	cg06730161	-12.9938	-0.43	0.0452	CNTN1;CNTN1	NM_175038;NM_001843	TSS1500;TSS1500
chr12:48577362-48577362	cg03272292	-35.7041	-0.43	0.0458	C12orf68	NM_001013635	TSS200
chr12:52014778-52014778	cg08140412	-15.6336	-0.7	0.0003	SCN8A	NM_014191	5'UTR
chr12:56843372-56843372	cg05848320	-19.1425	-0.45	0.0357	TIMELESS	NM_003920	TSS200
chr12:66629396-66629396	cg10879207	-16.5264	-0.54	0.0094	IRAK3;IRAK3	NM_001142523;NM_007199	Body;Body
chr12:6807082-6807082	cg12051956	-10.7875	-0.49	0.0221	C12orf53	NM_153685	Body
chr12:68554673-68554673	cg20890145	-21.3468	0.49	0.0194	IFNG	NM_000619	TSS1500
chr12:75728104-75728104	cg19430489	-19.4421	-0.52	0.0135	GLIPR1L1	NM_152779	TSS1500
chr12:75784541-75784541	cg20291222	-12.0307	-0.47	0.0291	GLIPR1L2	NM_152436	TSS1500
chr12:7596703-7596703	cg11300147	-15.4615	-0.5	0.0171	CD163L1	NM_174941	1stExon
chr12:76577488-76577488	cg02389317	-10.3861	-0.47	0.0289
chr12:78241621-78241621	cg24902478	-16.997	-0.44	0.0409	NAV3	NM_014903	Body
chr12:91349725-91349725	cg05963410	-19.218	0.48	0.0234	C12orf12	NM_152638	TSS1500
chr12:91741789-91741789	cg01299925	-10.9977	-0.56	0.0068
chr12:95867190-95867190	cg11207300	-10.2798	-0.48	0.0224	METAP2	NM_006838	TSS1500
chr12:9800544-9800544	cg04435084	-20.1228	-0.76	0	LOC374443	NR_002814	TSS200
chr13:108817948-108817948	cg07743730	-29.6776	-0.42	0.0488
chr13:112547341-112547341	cg02191228	-12.3696	-0.46	0.0307
chr13:112547653-112547653	cg15074709	-19.4047	-0.42	0.0488
chr13:112985983-112985983	cg23419756	-17.3888	-0.63	0.0019
chr13:114830702-114830702	cg21461300	-22.6408	-0.6	0.0033	RASA3	NM_007368	Body
chr13:114904418-114904418	cg15513719	-12.8274	-0.45	0.0362
chr13:26302267-26302267	cg00990690	-12.558	-0.51	0.0163	ATP8A2	NM_016529	Body
chr13:31556779-31556779	cg10420075	-10.8858	-0.43	0.0481
chr13:33113069-33113069	cg12542281	-14.5861	-0.51	0.0159	N4BP2L2;N4BP2L2	NM_033111;NM_014887	TSS200;TSS200
chr13:36728869-36728869	cg23875404	-10.611	-0.45	0.0352
chr13:43321660-43321660	cg22956205	-18.016	-0.53	0.0108
chr13:43407068-43407068	cg26612156	-26.2356	-0.5	0.0178
chr13:43545157-43545157	cg17400905	-10.2625	-0.54	0.01	EPSTI1;EPSTI1	NM_033255;NM_001002264	Body;Body
chr13:50819265-50819265	cg05191839	-25.1652	-0.49	0.0207
chr13:59673789-59673789	cg13726828	-23.2265	-0.48	0.0251
chr13:70682771-70682771	cg23240145	-10.2938	-0.43	0.044	KLHL1;ATXN8OS	NM_020866;NR_002717	TSS200;Body
chr13:80913448-80913448	cg08421519	-13.4508	-0.53	0.0119	SPRY2	NM_005842	5'UTR
chr14:101528156-101528156	cg11721554	-12.9135	-0.46	0.0303	MIR377	NR_029869	TSS1500
chr14:102394274-102394274	cg27022326	-14.3978	-0.65	0.0012	PPP2R5C;PPP2R5C;PPP2R5C;PPP2R5C	NM_178586;NM_001161725;NM_001161726;NM_002719	3'UTR;3'UTR;3'UTR;3'UTR
chr14:105058234-105058234	cg00905584	-16.4164	-0.47	0.0282
chr14:105748885-105748885	cg10792982	-16.8706	-0.54	0.0088	BRF1	NM_001519	Body
chr14:21053613-21053613	cg04136490	-18.9558	-0.47	0.0272	RNASE11	NM_145250	5'UTR
chr14:21624639-21624639	cg07555731	-20.2268	-0.47	0.0255	OR5AU1	NM_001004731	TSS1500
chr14:24584326-24584326	cg02930876	-10.3752	-0.58	0.0049	DCAF11;DCAF11;DCAF11;DCAF11;DCAF11;DCAF11	NM_001163484;NM_025230;NM_181357;NR_028099;NR_028100;NM_025230	5'UTR;5'UTR;TSS200;Body;TSS200;1stExon
chr14:48148429-48148429	cg13721907	-13.8356	-0.57	0.0057
chr14:51760188-51760188	cg22805381	-11.5545	-0.5	0.018
chr14:52142383-52142383	cg07431973	-16.1915	-0.43	0.0433	FRMD6;FRMD6	NM_152330;NM_001042481	5'UTR;5'UTR
chr14:52347968-52347968	cg09261791	-11.752	-0.62	0.002	GNG2	NM_053064	5'UTR
chr14:57700568-57700568	cg16395911	-14.5339	0.44	0.0387	EXOC5	NM_006544	Body
chr14:65567845-65567845	cg01643441	-10.4437	-0.43	0.0443	MAX;MAX;MAX;MAX;MAX;MAX	NM_145116;NM_145112;NM_145114;NM_197957;NM_002382;NM_145113	Body;Body;Body;Body;Body;Body
chr14:68822877-68822877	cg14983684	-18.6928	-0.44	0.0421	RAD51L1;RAD51L1;RAD51L1	NM_133509;NM_002877;NM_133510	Body;Body;Body
chr14:74034893-74034893	cg25598083	-10.6546	-0.47	0.0265	ACOT2	NM_006821	TSS1500
chr14:77608987-77608987	cg02742133	-10.4583	-0.45	0.0346	ZDHHC22	NM_174976	TSS1500
chr14:77670584-77670584	cg20900312	-12.3841	-0.49	0.0203	TMEM63C	NM_020431	5'UTR
chr14:81894673-81894673	cg24000396	-10.5162	0.46	0.0326
chr14:96158915-96158915	cg01018864	-15.4741	-0.64	0.0015	TCL1B;TCL1B	NM_004918;NM_199206	3'UTR;3'UTR
chr15:101253502-101253502	cg20636559	-12.5162	-0.47	0.0289
chr15:101262162-101262162	cg05575505	-13.3331	-0.53	0.0103
chr15:102342791-102342791	cg19086905	-13.2621	-0.43	0.0446
chr15:25756044-25756044	cg02272429	-16.6381	-0.43	0.0455
chr15:37170017-37170017	cg00213301	-18.8624	-0.44	0.0418	LOC145845	NR_024264	Body
chr15:37178201-37178201	cg26727768	-11.3903	-0.53	0.011	LOC145845	NR_024264	Body
chr15:39871923-39871923	cg25503381	-12.3174	-0.54	0.0095	THBS1	NM_003246	TSS1500
chr15:42210119-42210119	cg07202353	-14.8194	-0.44	0.0427	EHD4	NM_139265	Body
chr15:51604503-51604503	cg05492904	-10.8772	-0.48	0.0228	CYP19A1;CYP19A1	NM_031226;NM_000103	5'UTR;5'UTR
chr15:54049269-54049269	cg01754967	-20.0428	-0.45	0.0339	WDR72	NM_182758	5'UTR
chr15:62541062-62541062	cg18931850	-10.8689	-0.49	0.0199
chr15:69324108-69324108	cg17073392	-16.7465	-0.47	0.0263	MIR548H4;NOX5	NR_031680;NM_024505	Body;Body
chr15:71372288-71372288	cg03253616	-16.6811	-0.43	0.0481
chr15:74495109-74495109	cg11787522	-14.0335	0.44	0.0427	STRA6;STRA6;STRA6;STRA6;STRA6;STRA6	NM_001142617;NM_001142618;NM_001142619;NM_022369;NM_022369;NM_001142620	5'UTR;5'UTR;5'UTR;1stExon;5'UTR;5'UTR
chr15:75095171-75095171	cg13619522	-19.1147	-0.45	0.0359	CSK;CSK	NM_004383;NM_001127190	3'UTR;3'UTR
chr15:76304546-76304546	cg13044277	-11.2343	-0.52	0.014	NRG4	NM_138573	5'UTR
chr15:79854927-79854927	cg16711274	-10.9873	-0.59	0.0036
chr15:81620559-81620559	cg17167159	-13.3634	0.44	0.0409
chr15:83298969-83298969	cg11022060	-14.6777	-0.5	0.0181	CPEB1	NM_030594	Body
chr15:85956922-85956922	cg00834924	-12.3499	-0.47	0.0282	AKAP13;AKAP13	NM_006738;NM_007200	5'UTR;5'UTR
chr15:89640878-89640878	cg12850396	-12.7639	-0.43	0.0446	ABHD2;ABHD2	NM_152924;NM_007011	5'UTR;5'UTR
chr15:90698455-90698455	cg17352215	-13.9589	-0.49	0.021
chr16:11834960-11834960	cg06994787	-10.5763	-0.56	0.0069	TXNDC11	NM_015914	Body
chr16:1331495-1331495	cg03465049	-10.2924	-0.43	0.0471
chr16:17107768-17107768	cg05364884	-30.9393	-0.47	0.0285
chr16:20083459-20083459	cg03607907	-12.9684	-0.45	0.0341	GPR139	NM_001002911	Body
chr16:2155961-2155961	cg04146151	-19.5187	-0.56	0.0062	PKD1;PKD1	NM_001009944;NM_000296	Body;Body
chr16:22959819-22959819	cg08259413	-11.5451	-0.49	0.0203
chr16:26156362-26156362	cg26874872	-28.5775	-0.44	0.0427
chr16:27378982-27378982	cg04522310	-11.7009	-0.5	0.0187
chr16:28959310-28959310	cg26663590	-21.8413	-0.48	0.023
chr16:2897074-2897074	cg00003900	-13.2694	-0.48	0.0234
chr16:49056674-49056674	cg09435411	-13.5594	-0.58	0.0051
chr16:49522337-49522337	cg10529845	-15.6169	-0.64	0.0014
chr16:60233305-60233305	cg08511886	-14.4945	-0.44	0.043
chr16:65692605-65692605	cg08797704	-11.4054	-0.55	0.0086
chr16:75034620-75034620	cg05449217	-12.5307	-0.45	0.0359	ZNRF1	NM_032268	Body
chr16:78005126-78005126	cg08236479	-12.1849	-0.56	0.0071	VAT1L	NM_020927	Body
chr16:80934340-80934340	cg09424398	-10.7181	-0.45	0.0357
chr16:86322930-86322930	cg08774207	-20.5067	-0.5	0.0189
chr16:87010217-87010217	cg16361757	-13.4898	-0.48	0.0226
chr16:88496788-88496788	cg03314029	-35.7698	-0.55	0.0074	ZNF469	NM_001127464	1stExon
chr16:89009557-89009557	cg07630078	-10.5823	-0.48	0.0243	CBFA2T3	NM_005187	Body
chr17:17878224-17878224	cg23957660	-25.3801	-0.6	0.0031	LRRC48;LRRC48;LRRC48;LRRC48	NM_001130092;NM_001130091;NM_031294;NM_001130090	5'UTR;5'UTR;5'UTR;5'UTR
chr17:20841558-20841558	cg08626831	-10.797	-0.43	0.0475
chr17:39010551-39010551	cg07958689	-20.6701	-0.44	0.0404
chr17:39539863-39539863	cg01841050	-21.6754	-0.56	0.0065	KRT34	NM_021013	TSS1500
chr17:39597402-39597402	cg25306838	-13.2495	-0.46	0.0329	KRT38;KRT38	NM_006771;NM_006771	1stExon;5'UTR
chr17:40333521-40333521	cg20406482	-16.0374	-0.43	0.0484	KCNH4	NM_012285	TSS1500
chr17:47100007-47100007	cg07017153	-10.134	-0.44	0.0409	IGF2BP1;IGF2BP1	NM_006546;NM_001160423	Body;Body
chr17:47297130-47297130	cg11164649	-10.0507	-0.47	0.0259	ABI3;ABI3	NM_001135186;NM_016428	Body;Body
chr17:47436584-47436584	cg07164631	-18.9531	-0.43	0.0455	ZNF652;ZNF652	NM_001145365;NM_014897	5'UTR;5'UTR
chr17:47972401-47972401	cg05299140	-11.9767	-0.58	0.0047
chr17:48546503-48546503	cg13764778	-11.4323	-0.43	0.0484	CHAD;ACSF2	NM_001267;NM_025149	TSS1500;Body
chr17:53847116-53847116	cg09380069	-14.6661	-0.49	0.0207	PCTP;PCTP	NM_021213;NM_001102402	Body;Body
chr17:54589122-54589122	cg09936146	-16.4736	0.47	0.0259
chr17:65688720-65688720	cg02641420	-20.0968	0.47	0.0291	PITPNC1;PITPNC1	NM_012417;NM_181671	Body;3'UTR
chr17:6917370-6917370	cg07308381	-12.3502	-0.55	0.0082	RNASEK;C17orf49;C17orf49;C17orf49	NM_001004333;NM_001142798;NM_174893;NM_001142799	Body;TSS1500;TSS1500;TSS1500
chr17:72892908-72892908	cg25874108	-11.0854	-0.66	0.0009
chr17:76704594-76704594	cg17343622	-19.678	-0.43	0.0446	CYTH1;CYTH1	NM_017456;NM_004762	Body;Body
chr17:77078091-77078091	cg17099445	-13.6505	-0.44	0.0415	ENGASE	NM_001042573	Body
chr17:77419534-77419534	cg05051628	-13.629	-0.55	0.0082	HRNBP3	NM_001082575	5'UTR
chr17:78152169-78152169	cg06209035	-10.5756	-0.43	0.0436	CARD14	NM_024110	TSS200
chr17:78830472-78830472	cg04470054	-14.0324	-0.52	0.0131	RPTOR;RPTOR	NM_001163034;NM_020761	Body;Body
chr17:79454562-79454562	cg19825371	-13.1908	-0.45	0.0373
chr17:79455736-79455736	cg09841001	-14.8603	-0.47	0.0272
chr17:80255457-80255457	cg21435684	-17.1628	-0.48	0.0224
chr17:80921117-80921117	cg24571110	-11.0692	-0.49	0.021	B3GNTL1	NM_001009905	Body
chr17:8648562-8648562	cg27217253	-16.5486	-0.44	0.0424	CCDC42;CCDC42	NM_001158261;NM_144681	TSS1500;TSS1500
chr18:10524910-10524910	cg07392482	-10.6062	-0.49	0.0192	NAPG	NM_003826	TSS1500
chr18:12404041-12404041	cg11993160	-12.6184	-0.47	0.0274
chr18:2659555-2659555	cg00700039	-10.9169	-0.54	0.009	SMCHD1	NM_015295	Body
chr18:44677553-44677553	cg17192377	-11.7218	-0.74	0	HDHD2	NM_032124	TSS1500
chr18:72509555-72509555	cg12573871	-15.1926	-0.57	0.0053	ZNF407;ZNF407;ZNF407	NM_017757;NM_001146190;NM_001146189	Body;Body;Body
chr18:74062785-74062785	cg06688621	-10.8827	-0.46	0.0329
chr18:77749232-77749232	cg18217446	-19.4286	-0.51	0.0155	TXNL4A	NM_006701	TSS1500
chr18:77749374-77749374	cg02955504	-11.3703	-0.48	0.0249	TXNL4A	NM_006701	TSS1500
chr19:12848293-12848293	cg08205843	-12.1949	-0.48	0.0237	ASNA1	NM_004317	TSS200
chr19:17800467-17800467	cg00647022	-10.2052	-0.43	0.0458	UNC13A	NM_001080421	TSS1500
chr19:20278015-20278015	cg15748470	-21.439	-0.53	0.0117	ZNF486	NM_052852	TSS200
chr19:20278051-20278051	cg03570035	-22.869	-0.48	0.0245	ZNF486	NM_052852	TSS200
chr19:21860753-21860753	cg08562672	-10.8082	0.48	0.023
chr19:33726655-33726655	cg08365609	-10.3703	-0.47	0.0272
chr19:35713391-35713391	cg19366770	-26.177	-0.58	0.0048
chr19:36049672-36049672	cg19903766	-12.7927	-0.45	0.0339	ATP4A	NM_000704	Body
chr19:3839231-3839231	cg22553301	-14.6965	-0.44	0.0427	ZFR2	NM_015174	Body
chr19:39692475-39692475	cg15541088	-12.7369	-0.56	0.0065	NCCRP1	NM_001001414	3'UTR
chr19:41915452-41915452	cg23083936	-10.7406	-0.51	0.0162	BCKDHA;BCKDHA	NM_000709;NM_001164783	Body;Body
chr19:44455277-44455277	cg14970029	-14.7264	-0.47	0.0274	ZNF221	NM_013359	TSS200
chr19:45445693-45445693	cg25017250	-17.0968	-0.49	0.0203	APOC4	NM_001646	Body
chr19:47017048-47017048	cg13801271	-34.3931	-0.45	0.0359
chr19:4769206-4769206	cg21300318	-11.2996	-0.52	0.0131	MIR7-3;C19orf30	NR_029607;NR_027148	TSS1500;Body
chr19:47713807-47713807	cg27333886	-19.7019	-0.42	0.0498	SAE1;SAE1;SAE1;SAE1	NM_001145714;NM_001145713;NR_027280;NM_005500	3'UTR;3'UTR;Body;3'UTR
chr19:48107418-48107418	cg18655633	-14.4094	-0.45	0.0362
chr19:49077983-49077983	cg14328676	-18.0264	-0.43	0.0475	SULT2B1;SULT2B1	NM_177973;NM_004605	Body;TSS1500
chr19:49078119-49078119	cg10262032	-10.7914	-0.56	0.0062	SULT2B1;SULT2B1	NM_177973;NM_004605	Body;TSS1500
chr19:49622717-49622717	cg15028160	-26.5726	-0.56	0.0072	PPFIA3;C19orf73;PPFIA3	NM_003660;NM_018111;NM_003660	5'UTR;TSS1500;1stExon
chr19:52071535-52071535	cg03343584	-15.9715	0.46	0.0314
chr19:52225777-52225777	cg08496123	-11.5336	-0.7	0.0003	HAS1	NM_001523	Body
chr19:52268814-52268814	cg04554195	-23.2303	-0.55	0.0086	FPR2;FPR2	NM_001005738;NM_001462	5'UTR;5'UTR
chr19:54468790-54468790	cg01293740	-11.3237	-0.46	0.0307	CACNG8	NM_031895	Body
chr19:57175043-57175043	cg08431567	-14.0515	-0.43	0.0465	ZNF835	NM_001005850	Body
chr19:716910-716910	cg04527429	-12.7784	-0.49	0.0203	PALM;PALM	NM_002579;NM_001040134	Body;Body
chr2:101620543-101620543	cg00670915	-10.2148	-0.44	0.0409	RPL31;RPL31;RPL31	NM_001099693;NM_001098577;NM_000993	Body;Body;Body
chr2:110271930-110271930	cg22478317	-13.0083	-0.42	0.0495
chr2:112811924-112811924	cg08481119	-10.607	-0.64	0.0015	TMEM87B	NM_032824	TSS1500
chr2:119977813-119977813	cg11715474	-11.4585	-0.57	0.0054
chr2:125077436-125077436	cg00300672	-20.8878	-0.53	0.0109	CNTNAP5	NM_130773	Body
chr2:147612852-147612852	cg18961501	-11.9015	-0.46	0.0303
chr2:153381623-153381623	cg04215359	-24.2124	-0.48	0.0224	FMNL2	NM_052905	Body
chr2:160653686-160653686	cg08347373	-20.607	-0.56	0.0072	CD302	NM_014880	Body
chr2:171573419-171573419	cg24772753	-11.0786	0.5	0.0169	SP5	NM_001003845	Body
chr2:171573891-171573891	cg21829923	-13.0823	0.43	0.0449	SP5	NM_001003845	Body
chr2:174517573-174517573	cg16721418	-12.3283	-0.44	0.0381
chr2:178484058-178484058	cg11237792	-26.6255	-0.44	0.0415	TTC30A	NM_152275	TSS1500
chr2:1801628-1801628	cg21862353	-21.2572	-0.46	0.0293	MYT1L	NM_015025	Body
chr2:189897254-189897254	cg19698099	-12.9173	0.53	0.0119	COL5A2	NM_000393	3'UTR
chr2:193758940-193758940	cg03484717	-11.1326	-0.43	0.0455
chr2:204103100-204103100	cg16796381	-11.1116	-0.52	0.0123	CYP20A1	NM_177538	TSS200
chr2:207077894-207077894	cg04952037	-10.2068	-0.51	0.0149	GPR1;GPR1	NM_005279;NM_001098199	5'UTR;5'UTR
chr2:214857742-214857742	cg25824236	-13.5018	-0.44	0.043	SPAG16	NM_024532	Body
chr2:217839249-217839249	cg04526104	-16.1645	-0.51	0.0161
chr2:219576539-219576539	cg02176678	-13.9723	-0.43	0.0484	TTLL4	NM_014640	5'UTR
chr2:220350567-220350567	cg06351981	-12.9922	-0.45	0.0349	SPEG	NM_005876	Body
chr2:226265132-226265132	cg06753901	-21.7702	-0.46	0.0331	KIAA1486	NM_020864	TSS1500
chr2:227667368-227667368	cg00684529	-24.2335	-0.47	0.0282
chr2:228243972-228243972	cg20683151	-23.2626	-0.44	0.0421	TM4SF20	NM_024795	1stExon
chr2:23358444-23358444	cg00388287	-12.8921	-0.44	0.0409
chr2:240031454-240031454	cg18479711	-26.3634	-0.51	0.0165	HDAC4	NM_006037	Body
chr2:240864720-240864720	cg16245495	-14.4476	0.5	0.0172
chr2:28978297-28978297	cg10717082	-11.2124	-0.42	0.0495	PPP1CB;PPP1CB	NM_206876;NM_002709	Body;Body
chr2:29044463-29044463	cg01103911	-26.6203	-0.54	0.01	SPDYA;SPDYA;SPDYA	NM_182756;NM_001008779;NM_001142634	Body;Body;Body
chr2:29339307-29339307	cg26052635	-13.0821	-0.58	0.0042	CLIP4	NM_024692	5'UTR
chr2:307058-307058	cg16092135	-15.8265	-0.42	0.0498
chr2:33929187-33929187	cg03997321	-13.2145	-0.48	0.0234
chr2:3741732-3741732	cg05977776	-14.7361	-0.55	0.0082	ALLC	NM_018436	Body
chr2:42399049-42399049	cg04741211	-10.4071	-0.5	0.0177	EML4;EML4	NM_001145076;NM_019063	Body;Body
chr2:43278552-43278552	cg09988805	-19.147	-0.44	0.0392
chr2:50570407-50570407	cg06707406	-14.794	-0.54	0.0096	NRXN1;NRXN1;NRXN1	NM_004801;NM_001135659;NM_138735	Body;Body;Body
chr2:65214625-65214625	cg03233656	-16.9602	-0.63	0.0017	SLC1A4	NM_001135581	TSS1500
chr2:69181420-69181420	cg24550525	-14.9408	-0.5	0.0172	GKN2	NM_182536	TSS1500
chr20:139680-139680	cg16931068	-10.1197	-0.48	0.0239	DEFB127	NM_139074	3'UTR
chr20:17679422-17679422	cg06243458	-10.1176	-0.43	0.0465	BANF2;BANF2;BANF2	NM_001014977;NM_178477;NM_001159495	TSS1500;TSS1500;Body
chr20:22562737-22562737	cg26686732	-25.8416	-0.44	0.0409	FOXA2;FOXA2	NM_021784;NM_153675	Body;Body
chr20:23433608-23433608	cg11657817	-19.6618	-0.51	0.0157	CST11;CST11	NM_130794;NM_080830	TSS200;TSS200
chr20:3022992-3022992	cg23848712	-24.7374	-0.44	0.0407	GNRH2;GNRH2;GNRH2	NM_178331;NM_178332;NM_001501	TSS1500;TSS1500;TSS1500
chr20:31828749-31828749	cg06576557	-10.4682	-0.54	0.0095	PLUNC;PLUNC	NM_130852;NM_016583	Body;Body
chr20:33562606-33562606	cg17775003	-14.7698	-0.43	0.0458	MYH7B	NM_020884	TSS1500
chr20:35059674-35059674	cg00159764	-14.167	-0.44	0.0412	DLGAP4	NM_014902	5'UTR
chr20:3716787-3716787	cg23546750	-14.66	-0.52	0.014	HSPA12B	NM_052970	5'UTR
chr20:37354254-37354254	cg16782807	-24.759	-0.5	0.0189	SLC32A1	NM_080552	Body
chr20:43028501-43028501	cg26232417	-19.6642	-0.69	0.0003	HNF4A;HNF4A;HNF4A;HNF4A;HNF4A;HNF4A	NM_000457;NM_001030003;NM_178849;NM_001030004;NM_175914;NM_178850	TSS1500;Body;TSS1500;Body;Body;TSS1500
chr20:44834899-44834899	cg16565696	-10.646	-0.47	0.0263	CDH22	NM_021248	Body
chr20:55844836-55844836	cg15867944	-18.7616	-0.51	0.0157
chr20:61731415-61731415	cg24940951	-21.1103	-0.52	0.0131	HAR1B;HAR1A	NR_003245;NR_003244	Body;TSS1500
chr20:62367698-62367698	cg14977069	-10.0187	-0.49	0.0212	LIME1	NM_017806	TSS1500
chr21:15071306-15071306	cg20817073	-12.5519	-0.45	0.0367
chr21:34957259-34957259	cg08911536	-10.5042	-0.49	0.0219	DONSON	NM_017613	Body
chr21:37258460-37258460	cg07330438	-19.6312	-0.45	0.0359
chr21:37436723-37436723	cg09026600	-36.7886	0.43	0.0449	SETD4	NM_017438	TSS200
chr21:44574022-44574022	cg15467834	-13.278	-0.42	0.0491
chr21:45232601-45232601	cg07003407	-16.2064	-0.43	0.0471	LOC284837	NR_026961	TSS200
chr21:47562057-47562057	cg14341051	-12.583	-0.44	0.043	FTCD;FTCD	NM_206965;NM_006657	Body;Body
chr21:47605072-47605072	cg13732083	-30.0875	-0.43	0.0475	C21orf56;C21orf56	NM_032261;NM_001142854	TSS1500;TSS1500
chr21:47646604-47646604	cg20557069	-15.7535	-0.55	0.0081	LSS;LSS;LSS;LSS	NM_001145437;NM_001145436;NM_002340;NM_001001438	Body;Body;Body;Body
chr22:19113955-19113955	cg00638073	-10.5956	-0.48	0.0241
chr22:21480518-21480518	cg20966148	-10.1053	-0.44	0.0424
chr22:29199247-29199247	cg01866022	-14.1643	-0.44	0.0427
chr22:50482045-50482045	cg09131332	-10.1127	-0.53	0.012	TTLL8	NM_001080447	Body
chr22:50585216-50585216	cg19213744	-10.5339	-0.48	0.0247	MOV10L1;MOV10L1;MOV10L1;MOV10L1	NM_001164104;NM_001164106;NM_001164105;NM_018995	Body;TSS1500;Body;Body
chr3:10394210-10394210	cg04931913	-13.9247	-0.54	0.0088	ATP2B2;ATP2B2	NM_001683;NM_001001331	Body;Body
chr3:105333123-105333123	cg23719209	-12.1231	-0.42	0.0498
chr3:114270647-114270647	cg08996334	-26.676	0.45	0.0365	ZBTB20;ZBTB20;ZBTB20;ZBTB20;ZBTB20;ZBTB20	NM_001164345;NM_001164346;NM_001164347;NM_001164344;NM_015642;NM_001164343	5'UTR;5'UTR;5'UTR;5'UTR;5'UTR;5'UTR
chr3:116158857-116158857	cg02741329	-13.8433	-0.49	0.0199	LSAMP	NM_002338	Body
chr3:123151962-123151962	cg15464481	-10.1368	-0.48	0.0243	ADCY5	NM_183357	Body
chr3:126061950-126061950	cg15490784	-21.6732	-0.46	0.0305	KLF15	NM_014079	3'UTR
chr3:135864939-135864939	cg00369142	-14.4866	-0.47	0.0257	PPP2R3A;PPP2R3A	NM_181897;NM_002718	3'UTR;3'UTR
chr3:13905567-13905567	cg13672747	-17.49	-0.5	0.0186	WNT7A	NM_004625	Body
chr3:150187338-150187338	cg04908077	-19.9441	-0.51	0.0158
chr3:155572952-155572952	cg02868222	-13.3241	-0.54	0.0098	SLC33A1	NM_004733	TSS1500
chr3:169478456-169478456	cg00151728	-11.3126	-0.5	0.0189
chr3:172166987-172166987	cg07848409	-10.9653	-0.56	0.0067	GHSR;GHSR	NM_198407;NM_004122	TSS1500;TSS1500
chr3:172494364-172494364	cg10028625	-14.3593	0.44	0.0381	ECT2	NM_018098	Body
chr3:173992754-173992754	cg17482360	-13.5786	-0.49	0.0209	NLGN1	NM_014932	Body
chr3:183945054-183945054	cg14097619	-14.0489	-0.43	0.0484
chr3:184089743-184089743	cg04380873	-12.8695	-0.72	0.0002
chr3:185993852-185993852	cg16042006	-17.3431	-0.6	0.0033	DGKG;DGKG;DGKG	NM_001346;NM_001080744;NM_001080745	Body;Body;Body
chr3:186022299-186022299	cg04589761	-15.39	-0.52	0.0137	DGKG;DGKG;DGKG	NM_001346;NM_001080744;NM_001080745	Body;Body;Body
chr3:35785958-35785958	cg13383435	-16.7467	-0.47	0.0267	MIR128-2;ARPP-21	NR_029824;NM_016300	TSS200;Body
chr3:38835179-38835179	cg01792749	-21.0352	-0.5	0.0187	SCN10A	NM_006514	Body
chr3:46251215-46251215	cg18146398	-11.6511	-0.44	0.0424	CCR1	NM_001295	TSS1500
chr3:52032075-52032075	cg20685233	-16.4496	-0.46	0.0321
chr3:52824283-52824283	cg18404041	-13.326	-0.58	0.0048	ITIH1;ITIH1;ITIH1;ITIH1	NM_001166435;NM_001166434;NM_001166436;NM_002215	Body;Body;Body;Body
chr3:58563097-58563097	cg23827531	-11.9285	0.47	0.028	FAM107A;FAM107A;FAM107A;FAM107A	NM_007177;NM_007177;NM_001076778;NM_001076778	1stExon;5'UTR;5'UTR;1stExon
chr3:68039483-68039483	cg04394710	-17.1885	-0.47	0.0282
chr3:69819855-69819855	cg03489020	-16.9427	-0.46	0.0307	MITF;MITF	NM_198159;NM_006722	Body;Body
chr3:73529447-73529447	cg24173753	-18.3868	-0.46	0.0298	PDZRN3	NM_015009	Body
chr3:85042454-85042454	cg24433477	-14.1819	-0.43	0.0481	CADM2;CADM2	NM_001167675;NM_001167674	Body;Body
chr3:8671361-8671361	cg02578087	-10.0508	-0.51	0.0149	C3orf32	NM_015931	Body
chr3:8818056-8818056	cg26289788	-13.2358	-0.59	0.0038
chr4:102340691-102340691	cg26639552	-16.6942	-0.46	0.031
chr4:1044584-1044584	cg04106633	-11.974	-0.5	0.019
chr4:112572194-112572194	cg22716950	-11.8983	-0.43	0.0478
chr4:122721982-122721982	cg06713675	-28.7319	-0.59	0.0037	EXOSC9;EXOSC9	NM_005033;NM_001034194	TSS1500;TSS1500
chr4:122854330-122854330	cg07674022	-10.9358	-0.42	0.0498	TRPC3;TRPC3	NM_001130698;NM_003305	Body;TSS200
chr4:123542198-123542198	cg00136405	-16.5697	-0.44	0.0381	IL21;IL21	NM_021803;NM_021803	5'UTR;1stExon
chr4:124299999-124299999	cg15082040	-22.3675	-0.44	0.0412
chr4:127771714-127771714	cg16578085	-10.5287	-0.47	0.0289
chr4:142197646-142197646	cg03877014	-14.9154	-0.44	0.0409
chr4:154515617-154515617	cg26103306	-12.0773	-0.51	0.0158	KIAA0922;KIAA0922	NM_015196;NM_001131007	Body;Body
chr4:156787741-156787741	cg05385306	-12.748	-0.44	0.0381	ACCN5	NM_017419	TSS1500
chr4:168829894-168829894	cg25026904	-23.2645	-0.44	0.0398
chr4:169239900-169239900	cg12688884	-11.51	-0.57	0.0058	DDX60;DDX60	NM_017631;NM_017631	5'UTR;1stExon
chr4:17310680-17310680	cg14599380	-15.8888	-0.46	0.0321
chr4:184390449-184390449	cg01543307	-12.3378	-0.56	0.0072
chr4:3345495-3345495	cg19670885	-14.4965	-0.42	0.0495	RGS12;RGS12	NM_198229;NM_002926	Body;Body
chr4:3464653-3464653	cg25120210	-13.3153	-0.48	0.0239	DOK7;DOK7	NM_001164673;NM_173660	TSS1500;TSS1500
chr4:38858536-38858536	cg10182418	-12.1813	-0.63	0.0016	TLR6	NM_006068	TSS200
chr4:39034637-39034637	cg02131853	-11.934	-0.72	0.0002	TMEM156	NM_024943	TSS1500
chr4:4397942-4397942	cg09852389	-19.1178	-0.43	0.0446	D4S234E;D4S234E	NM_014392;NM_001040101	Body;Body
chr4:56718320-56718320	cg18463607	-24.0755	-0.43	0.0455	EXOC1;EXOC1;EXOC1	NM_018261;NM_178237;NM_001024924	TSS1500;TSS1500;TSS1500
chr4:6379482-6379482	cg01253818	-11.7324	-0.52	0.0128	PPP2R2C;PPP2R2C	NM_181876;NM_020416	Body;Body
chr4:6449865-6449865	cg05572800	-13.587	-0.5	0.0168	PPP2R2C	NM_020416	Body
chr4:70389517-70389517	cg05160558	-11.2643	0.48	0.0232
chr4:8081417-8081417	cg08557246	-13.6777	-0.51	0.0152	ABLIM2;ABLIM2;ABLIM2;ABLIM2;ABLIM2;ABLIM2;ABLIM2	NM_032432;NM_001130083;NM_001130087;NM_001130088;NM_001130084;NM_001130085;NM_001130086	Body;Body;Body;Body;Body;Body;Body
chr4:8137155-8137155	cg19588649	-10.9192	-0.51	0.0146	ABLIM2;ABLIM2;ABLIM2;ABLIM2;ABLIM2;ABLIM2;ABLIM2	NM_032432;NM_001130083;NM_001130087;NM_001130088;NM_001130084;NM_001130085;NM_001130086	Body;Body;Body;Body;Body;Body;Body
chr4:8305940-8305940	cg18421538	-13.2003	-0.7	0.0003	HTRA3	NM_053044	Body
chr4:8354138-8354138	cg12771852	-11.0524	-0.53	0.0105
chr4:85818121-85818121	cg23528488	-11.7028	0.45	0.0367	WDFY3;WDFY3;WDFY3	NM_014991;NM_178583;NM_178583	5'UTR;5'UTR;1stExon
chr4:87235054-87235054	cg14155327	-15.4997	-0.5	0.0187	MAPK10;MAPK10;MAPK10	NM_138980;NM_138982;NM_002753	5'UTR;5'UTR;5'UTR
chr4:87857667-87857667	cg19533294	-26.3259	-0.62	0.0021	AFF1	NM_001166693	5'UTR
chr4:89619051-89619051	cg19151808	-51.5559	-0.52	0.0125	NAP1L5;HERC3	NM_153757;NM_014606	TSS200;Body
chr4:95572122-95572122	cg00096603	-10.6271	-0.57	0.0053	PDLIM5;PDLIM5;PDLIM5	NR_024179;NM_006457;NM_001011513	Body;Body;Body
chr4:99445460-99445460	cg08915024	-12.3162	0.44	0.0412	TSPAN5	NM_005723	Body
chr5:100237986-100237986	cg01860063	-20.8569	-0.51	0.0154	ST8SIA4;ST8SIA4	NM_005668;NM_175052	Body;Body
chr5:1003897-1003897	cg18801579	-10.9458	-0.45	0.0378
chr5:106879524-106879524	cg26966186	-15.5887	-0.61	0.0028	EFNA5	NM_001962	Body
chr5:112535690-112535690	cg11772086	-45.589	-0.48	0.0236	MCC;MCC	NM_002387;NM_001085377	Body;Body
chr5:11512237-11512237	cg16278604	-10.2744	0.53	0.0114	CTNND2	NM_001332	Body
chr5:1174522-1174522	cg19857761	-24.6019	-0.53	0.0103
chr5:125960612-125960612	cg20380975	-15.7096	-0.43	0.0452	PHAX	NM_032177	3'UTR
chr5:135529341-135529341	cg24963147	-12.7366	-0.45	0.0362	LOC389332	NR_024418	TSS1500
chr5:140098230-140098230	cg13303313	-12.0776	-0.56	0.0065	VTRNA1-2	NR_026704	TSS1500
chr5:14159230-14159230	cg01138673	-10.0533	-0.51	0.0159	TRIO	NM_007118	Body
chr5:142078020-142078020	cg18808506	-14.1211	-0.45	0.0339	FGF1;FGF1;FGF1;FGF1	NR_026696;NM_001144935;NM_001144934;NR_026695	TSS1500;TSS1500;TSS1500;TSS1500
chr5:148205646-148205646	cg01779903	-10.2883	-0.53	0.0105	ADRB2	NM_000024	TSS1500
chr5:150284796-150284796	cg21228005	-10.5341	-0.53	0.0121	ZNF300	NM_052860	TSS1500
chr5:151328029-151328029	cg25373553	-10.6405	-0.43	0.0443
chr5:153039227-153039227	cg19752602	-11.0777	-0.43	0.0484	GRIA1;GRIA1	NM_000827;NM_001114183	Body;Body
chr5:154665524-154665524	cg08894020	-16.5383	-0.42	0.0498
chr5:158878380-158878380	cg09483595	-33.345	-0.52	0.0122	LOC285627	NR_027110	Body
chr5:1641593-1641593	cg20438820	-24.2152	-0.43	0.0475
chr5:166710712-166710712	cg12659981	-14.3937	-0.44	0.0412	ODZ2	NM_001122679	TSS1500
chr5:168403541-168403541	cg24624090	-10.7956	-0.45	0.0354	SLIT3	NM_003062	Body
chr5:169128366-169128366	cg14693941	-10.4532	-0.48	0.0228	DOCK2	NM_004946	Body
chr5:172168177-172168177	cg23172080	-14.4144	-0.5	0.0169
chr5:173397343-173397343	cg17649445	-14.3473	-0.45	0.0346
chr5:177981891-177981891	cg17731547	-11.8849	-0.52	0.0125	COL23A1	NM_173465	Body
chr5:178593785-178593785	cg08528934	-11.0765	-0.44	0.0421	ADAMTS2;ADAMTS2	NM_021599;NM_014244	Body;Body
chr5:1807338-1807338	cg12343338	-24.6158	-0.45	0.0352	NDUFS6	NM_004553	Body
chr5:2135863-2135863	cg00025405	-10.1158	-0.46	0.0298
chr5:31769846-31769846	cg00960906	-12.2171	-0.49	0.0216
chr5:32532223-32532223	cg15686949	-15.4642	-0.59	0.0037
chr5:33309433-33309433	cg03889507	-11.7636	-0.48	0.0226
chr5:33901508-33901508	cg11823603	-13.9063	-0.49	0.0209
chr5:42995369-42995369	cg24676817	-12.8399	-0.8	0
chr5:475889-475889	cg21159260	-12.3808	-0.57	0.0054	SLC9A3	NM_004174	Body
chr5:476497-476497	cg06852942	-31.8987	-0.51	0.0162	SLC9A3	NM_004174	Body
chr5:480033-480033	cg19980199	-15.1107	-0.46	0.0317	SLC9A3	NM_004174	Body
chr5:480121-480121	cg06925438	-25.1986	-0.44	0.0424	SLC9A3	NM_004174	Body
chr5:480253-480253	cg10655629	-22.288	-0.56	0.0063	SLC9A3	NM_004174	Body
chr5:480412-480412	cg01103582	-15.7755	-0.55	0.0085	SLC9A3	NM_004174	Body
chr5:52856678-52856678	cg17584576	-11.446	-0.43	0.0455	NDUFS4	NM_002495	Body
chr5:54526536-54526536	cg03387346	-11.5551	-0.57	0.0053
chr5:56972268-56972268	cg11818544	-14.3462	-0.42	0.0498
chr5:63253616-63253616	cg10485633	-20.7036	-0.44	0.0387
chr5:71475303-71475303	cg12947138	-15.0509	-0.51	0.0152	MAP1B	NM_005909	Body
chr5:7781077-7781077	cg24904943	-33.026	-0.48	0.023	ADCY2	NM_020546	Body
chr5:83268490-83268490	cg02265105	-10.0603	-0.48	0.0237	EDIL3	NM_005711	Body
chr5:89825590-89825590	cg11234065	-14.5441	-0.54	0.0093	LYSMD3	NM_198273	TSS200
chr6:100906448-100906448	cg00231504	-10.5195	-0.48	0.0224	SIM1	NM_005068	Body
chr6:105691356-105691356	cg19212453	-21.316	-0.49	0.0202
chr6:11043368-11043368	cg01799681	-10.3184	-0.43	0.0484	ELOVL2	NM_017770	Body
chr6:114697971-114697971	cg07308384	-14.9808	-0.42	0.0491
chr6:116892183-116892183	cg09687322	-11.3225	-0.59	0.0039	RWDD1;RWDD1;RWDD1	NM_016104;NM_001007464;NM_015952	TSS1500;TSS1500;TSS1500
chr6:13114660-13114660	cg03565153	-15.8492	-0.44	0.0392	PHACTR1	NM_030948	Body
chr6:133529701-133529701	cg04499646	-11.9826	-0.63	0.0016
chr6:146057943-146057943	cg05220968	-13.7247	-0.44	0.0401	EPM2A;EPM2A	NM_001018041;NM_005670	TSS1500;TSS1500
chr6:149657288-149657288	cg16237031	-10.8024	-0.47	0.0287	MAP3K7IP2	NM_015093	5'UTR
chr6:150357289-150357289	cg08316699	-10.0493	-0.53	0.0104
chr6:150922513-150922513	cg14608074	-11.077	-0.48	0.023	PLEKHG1	NM_001029884	5'UTR
chr6:159466054-159466054	cg15217044	-21.2277	-0.46	0.0331	TAGAP;TAGAP;TAGAP;TAGAP;TAGAP;TAGAP	NM_152133;NM_152133;NM_054114;NM_138810;NM_138810;NM_054114	1stExon;5'UTR;5'UTR;1stExon;5'UTR;1stExon
chr6:159466062-159466062	cg05262335	-27.5656	-0.46	0.0324	TAGAP;TAGAP;TAGAP;TAGAP;TAGAP;TAGAP	NM_152133;NM_152133;NM_054114;NM_138810;NM_138810;NM_054114	1stExon;5'UTR;5'UTR;1stExon;5'UTR;1stExon
chr6:159657657-159657657	cg07739841	-13.5033	-0.57	0.006	FNDC1	NM_032532	Body
chr6:161100122-161100122	cg07260592	-12.3854	-0.5	0.0189
chr6:163574564-163574564	cg25724842	-18.2885	-0.47	0.0278	PACRG;PACRG;PACRG	NM_152410;NM_001080378;NM_001080379	Body;Body;Body
chr6:167530185-167530185	cg05540913	-14.276	-0.43	0.0436	CCR6	NM_004367	5'UTR
chr6:167809876-167809876	cg23637354	-15.1905	-0.61	0.0027
chr6:167810043-167810043	cg07358634	-14.2472	-0.47	0.0265
chr6:169235025-169235025	cg10531104	-13.1757	-0.54	0.0088
chr6:170481370-170481370	cg01142430	-10.4271	-0.63	0.0015
chr6:19155350-19155350	cg07523189	-24.1826	-0.48	0.0251
chr6:19695425-19695425	cg14236955	-21.7276	-0.44	0.0401
chr6:25832356-25832356	cg22988581	-11.4779	-0.47	0.0263	SLC17A1	NM_005074	TSS200
chr6:26034056-26034056	cg08905325	-12.4054	-0.44	0.0395	HIST1H2AB	NM_003513	TSS1500
chr6:26199562-26199562	cg10985452	-17.505	-0.49	0.0212	HIST1H2AD;HIST1H2BF;HIST1H3D	NM_021065;NM_003522;NM_003530	TSS200;TSS1500;TSS200
chr6:26544615-26544615	cg11576988	-10.4202	-0.43	0.0443	HMGN4	NM_006353	5'UTR
chr6:28499676-28499676	cg18361418	-18.8026	-0.45	0.037	GPX5;GPX5	NM_003996;NM_001509	Body;Body
chr6:2875723-2875723	cg07096305	-13.3229	-0.56	0.0067
chr6:29894005-29894005	cg04227238	-16.8212	-0.43	0.0449	HCG4P6	NR_001317	TSS1500
chr6:30045068-30045068	cg24276787	-12.5596	-0.47	0.0265	RNF39;RNF39	NM_025236;NM_170769	TSS1500;TSS1500
chr6:30131749-30131749	cg23778358	-13.1113	-0.44	0.0415	TRIM15	NM_033229	1stExon
chr6:30131755-30131755	cg05664039	-11.5248	-0.45	0.0365	TRIM15	NM_033229	1stExon
chr6:30131915-30131915	cg01452581	-10.9929	-0.42	0.0491	TRIM15	NM_033229	Body
chr6:30460484-30460484	cg19109457	-11.4071	-0.54	0.0092	HLA-E	NM_005516	3'UTR
chr6:31146417-31146417	cg05631194	-11.7852	-0.57	0.0051	PSORS1C3	NR_026816	TSS1500
chr6:31464980-31464980	cg20240154	-11.3727	-0.45	0.0339	MICB	NM_005931	TSS1500
chr6:32728862-32728862	cg12296550	-21.4828	-0.52	0.0136	HLA-DQB2	NR_003937	Body
chr6:33084549-33084549	cg03943025	-18.2178	-0.46	0.0314	HLA-DPB2	NR_001435	Body
chr6:33875991-33875991	cg27595127	-14.2988	-0.43	0.0478
chr6:3489366-3489366	cg16020210	-14.6308	0.65	0.001
chr6:36645608-36645608	cg11920449	-17.0752	-0.5	0.0178	CDKN1A;CDKN1A	NM_078467;NM_000389	TSS1500;TSS1500
chr6:37212272-37212272	cg06392574	-16.1151	-0.42	0.0491	TMEM217;TMEM217	NM_145316;NM_001162900	5'UTR;5'UTR
chr6:39761595-39761595	cg22775123	-12.6745	-0.46	0.0303	DAAM2	NM_015345	5'UTR
chr6:39803454-39803454	cg17693796	-15.6015	0.46	0.0317	DAAM2	NM_015345	5'UTR
chr6:41743637-41743637	cg26237066	-12.0028	-0.46	0.0319	FRS3	NM_006653	Body
chr6:43576101-43576101	cg15550618	-21.5248	-0.5	0.019	POLH	NM_006502	Body
chr6:49988602-49988602	cg02585622	-10.8275	-0.47	0.0263	DEFB110;DEFB110	NM_001037728;NM_001037497	Body;Body
chr6:55298362-55298362	cg05616589	-13.3307	-0.49	0.0221
chr6:5969260-5969260	cg14723921	-10.3916	-0.51	0.0159
chr6:74647315-74647315	cg16124188	-15.93	-0.42	0.0495
chr6:7731280-7731280	cg23623251	-11.9542	-0.46	0.0305	BMP6	NM_001718	Body
chr6:9516073-9516073	cg08617135	-12.3492	-0.51	0.015
chr6:99842351-99842351	cg18751133	-13.3413	-0.43	0.0433	COQ3	NM_017421	TSS1500
chr7:100330587-100330587	cg02938413	-16.8644	-0.5	0.0183	ZAN;ZAN	NM_173059;NM_003386	TSS1500;TSS1500
chr7:10116380-10116380	cg16618789	-12.3265	-0.45	0.0362
chr7:120721606-120721606	cg25202791	-21.3357	-0.47	0.0287	C7orf58;C7orf58	NM_001105533;NM_024913	Body;Body
chr7:1216933-1216933	cg17372657	-19.284	-0.46	0.0314
chr7:1221192-1221192	cg26875135	-11.5282	-0.46	0.0317
chr7:123484898-123484898	cg15560337	-16.9109	-0.57	0.0059	HYAL4	NM_012269	TSS1500
chr7:123485043-123485043	cg13882046	-18.9333	-0.43	0.0478	HYAL4	NM_012269	TSS200
chr7:127804217-127804217	cg16369987	-11.781	-0.45	0.0367
chr7:129978694-129978694	cg26912131	-12.8008	-0.48	0.0237
chr7:134443864-134443864	cg03188976	-14.8146	-0.47	0.0267
chr7:134900650-134900650	cg03644971	-17.0039	0.44	0.0404
chr7:136691229-136691229	cg02440199	-12.212	-0.54	0.0101	CHRM2;CHRM2;CHRM2;CHRM2;CHRM2;CHRM2;CHRM2;CHRM2	NM_001006631;NM_000739;NM_001006627;NM_001006628;NM_001006629;NM_001006632;NM_001006630;NM_001006626	5'UTR;5'UTR;5'UTR;5'UTR;5'UTR;5'UTR;5'UTR;5'UTR
chr7:142043807-142043807	cg24469849	-18.6883	-0.43	0.0446
chr7:1420943-1420943	cg24979167	-13.0623	-0.45	0.0341
chr7:142828903-142828903	cg05667197	-11.5245	-0.52	0.0129	PIP	NM_002652	TSS1500
chr7:149945858-149945858	cg19773249	-25.3065	0.45	0.037	ACTR3C;ACTR3C	NM_001164458;NM_001164459	3'UTR;3'UTR
chr7:150038898-150038898	cg27494647	-12.0935	-0.45	0.0378	RARRES2	NM_002889	TSS200
chr7:150435779-150435779	cg03334072	-13.4109	-0.51	0.0152	GIMAP5	NM_018384	5'UTR
chr7:150780086-150780086	cg03104561	-11.2579	-0.45	0.0365	TMUB1;TMUB1;TMUB1	NM_001136044;NM_031434;NM_031434	5'UTR;1stExon;5'UTR
chr7:152063901-152063901	cg27610605	-10.2412	-0.54	0.0096	MLL3	NM_170606	Body
chr7:152063907-152063907	cg09237454	-11.2874	-0.52	0.0125	MLL3	NM_170606	Body
chr7:152064079-152064079	cg19365810	-14.337	-0.54	0.0094	MLL3	NM_170606	Body
chr7:155348125-155348125	cg03060590	-18.0728	-0.45	0.0346
chr7:155754630-155754630	cg25593309	-16.973	-0.5	0.0177
chr7:156740196-156740196	cg04969340	-13.7232	-0.46	0.0307
chr7:157918647-157918647	cg00369443	-20.0606	-0.43	0.0475	PTPRN2;PTPRN2;PTPRN2	NM_002847;NM_130842;NM_130843	Body;Body;Body
chr7:2612101-2612101	cg23043143	-12.0887	-0.52	0.0124	IQCE;IQCE	NM_001100390;NM_152558	Body;Body
chr7:27170388-27170388	cg07317062	-13.7115	-0.45	0.0357	HOXA4;HOXA4	NM_002141;NM_002141	5'UTR;1stExon
chr7:2738728-2738728	cg05864433	-12.0543	-0.51	0.0158	AMZ1	NM_133463	5'UTR
chr7:28475121-28475121	cg25991468	-20.4441	-0.53	0.0117	CREB5;CREB5;CREB5	NM_182899;NM_182898;NM_004904	5'UTR;Body;TSS200
chr7:28476022-28476022	cg27517282	-11.1137	-0.44	0.0418	CREB5;CREB5;CREB5	NM_004904;NM_182899;NM_182898	5'UTR;5'UTR;Body
chr7:31725748-31725748	cg23348723	-18.2824	-0.43	0.0468	C7orf16;C7orf16	NM_001145123;NM_006658	TSS1500;TSS1500
chr7:38726758-38726758	cg03517998	-14.6194	-0.46	0.0293	FAM183B	NR_028347	TSS200
chr7:40047674-40047674	cg08832195	-17.16	-0.51	0.0152	CDK13;CDK13	NM_031267;NM_003718	Body;Body
chr7:41174125-41174125	cg04848660	-12.6721	0.47	0.0265
chr7:41259421-41259421	cg00226689	-20.0254	0.49	0.0207
chr7:45926556-45926556	cg20237960	-12.7819	0.42	0.0495	IGFBP1	NM_000596	TSS1500
chr7:47556811-47556811	cg20258698	-12.5898	-0.44	0.0427	TNS3	NM_022748	5'UTR
chr7:5518392-5518392	cg10206969	-12.9479	0.46	0.0324	FBXL18	NM_024963	3'UTR
chr7:65037704-65037704	cg01136167	-11.294	-0.54	0.0092
chr7:73624373-73624373	cg03000596	-20.4573	-0.44	0.0427	LAT2;LAT2;LAT2;LAT2;LAT2;LAT2	NM_032463;NM_032464;NM_014146;NM_014146;NM_032463;NM_032464	5'UTR;5'UTR;5'UTR;1stExon;1stExon;1stExon
chr7:78346166-78346166	cg11791670	-14.7973	-0.44	0.0392	MAGI2	NM_012301	Body
chr7:80080213-80080213	cg26069973	-22.7336	-0.45	0.0367
chr7:87228749-87228749	cg19861260	-24.4147	-0.53	0.0112	ABCB1	NM_000927	Body
chr7:94012630-94012630	cg19761758	-10.7976	-0.46	0.0317
chr7:94953653-94953653	cg07404485	-18.9105	-0.48	0.0247	PON1	NM_000446	Body
chr7:94953680-94953680	cg05342682	-18.9105	-0.43	0.0436	PON1	NM_000446	Body
chr7:94953770-94953770	cg04155289	-30.0031	-0.45	0.037	PON1	NM_000446	1stExon
chr7:94954059-94954059	cg01874867	-24.2564	-0.49	0.0192	PON1	NM_000446	TSS200
chr7:94954202-94954202	cg04871131	-19.8049	-0.48	0.0228	PON1	NM_000446	TSS1500
chr8:10383763-10383763	cg04057858	-14.3921	-0.5	0.0177	T-SP1	NM_198464	Body
chr8:1047734-1047734	cg01049933	-23.1534	-0.48	0.0236
chr8:110020783-110020783	cg21603744	-10.9787	0.42	0.0498
chr8:11138403-11138403	cg20902975	-10.6176	-0.43	0.0443
chr8:117778069-117778069	cg09305680	-12.3548	-0.58	0.005	UTP23	NM_032334	TSS1500
chr8:1203598-1203598	cg22094781	-10.7836	-0.52	0.0122
chr8:124284393-124284393	cg20987431	-17.8022	-0.42	0.0488	ZHX1;ZHX1	NM_007222;NM_001017926	5'UTR;5'UTR
chr8:1319507-1319507	cg00536910	-14.4015	-0.49	0.0207
chr8:134003896-134003896	cg08498833	-12.4886	-0.45	0.0346	TG	NM_003235	Body
chr8:13787749-13787749	cg12665059	-13.7422	-0.55	0.0075
chr8:138898243-138898243	cg13708803	-15.3464	-0.51	0.0161
chr8:140666812-140666812	cg26169668	-10.8404	-0.48	0.0237	KCNK9	NM_016601	Body
chr8:144152376-144152376	cg17001448	-13.7724	-0.45	0.0339
chr8:144226521-144226521	cg12111787	-13.0234	-0.46	0.0312
chr8:145008288-145008288	cg02331830	-15.3227	-0.48	0.0251	PLEC1;PLEC1;PLEC1;PLEC1;PLEC1;PLEC1;PLEC1;PLEC1	NM_201378;NM_201384;NM_201382;NM_201381;NM_000445;NM_201380;NM_201383;NM_201379	Body;Body;Body;Body;Body;Body;Body;Body
chr8:145008397-145008397	cg04255391	-19.4103	-0.45	0.037	PLEC1;PLEC1;PLEC1;PLEC1;PLEC1;PLEC1;PLEC1;PLEC1	NM_201378;NM_201384;NM_201382;NM_201381;NM_000445;NM_201380;NM_201383;NM_201379	Body;Body;Body;Body;Body;Body;Body;Body
chr8:145594413-145594413	cg25767154	-13.4404	-0.56	0.0064
chr8:18673170-18673170	cg22872064	-12.1021	-0.57	0.0058	PSD3	NM_015310	Body
chr8:19536244-19536244	cg27510066	-18.6463	-0.49	0.0219	CSGALNACT1;CSGALNACT1	NR_024040;NM_018371	Body;5'UTR
chr8:1973590-1973590	cg21884509	-16.4146	-0.46	0.0298
chr8:22527157-22527157	cg21553199	-11.0887	-0.52	0.0127	BIN3	NM_018688	TSS1500
chr8:24298771-24298771	cg05847038	-10.7798	-0.49	0.0203	ADAM7	NM_003817	Body
chr8:25501771-25501771	cg02681163	-12.8932	-0.51	0.0143
chr8:33792227-33792227	cg24299548	-17.659	-0.52	0.0128
chr8:55243181-55243181	cg11645465	-10.0419	-0.46	0.0317
chr8:56795786-56795786	cg03659680	-15.7451	0.44	0.043	LYN;LYN	NM_002350;NM_001111097	5'UTR;5'UTR
chr8:66546636-66546636	cg23957015	-11.4292	-0.45	0.0349	ARMC1	NM_018120	TSS1500
chr8:70378645-70378645	cg12181083	-10.38	0.49	0.0221	SULF1;SULF1	NM_001128204;NM_015170	TSS1500;TSS1500
chr8:70378760-70378760	cg07073960	-10.2897	0.43	0.0481	SULF1;SULF1	NM_015170;NM_001128204	TSS200;TSS200
chr8:73160775-73160775	cg02507677	-14.9399	-0.6	0.003
chr8:75261544-75261544	cg12868707	-12.667	-0.56	0.0069	GDAP1;GDAP1	NM_018972;NM_001040875	TSS1500;TSS1500
chr8:77616048-77616048	cg22308101	-16.6369	-0.51	0.0165	ZFHX4	NM_024721	5'UTR
chr8:85461487-85461487	cg03562117	-12.5231	-0.56	0.0062	RALYL;RALYL;RALYL;RALYL	NM_001100393;NM_001100392;NM_001100391;NM_173848	Body;Body;Body;Body
chr8:86133288-86133288	cg07095671	-20.7895	-0.72	0.0001	C8orf59;C8orf59;C8orf59;C8orf59	NM_001099671;NM_001099672;NM_001099673;NM_001099670	TSS1500;TSS1500;TSS1500;TSS1500
chr8:92971562-92971562	cg25439479	-13.0639	-0.44	0.0418	RUNX1T1;RUNX1T1;RUNX1T1;RUNX1T1	NM_175634;NM_004349;NM_175635;NM_175636	3'UTR;3'UTR;3'UTR;3'UTR
chr8:98116447-98116447	cg23205034	-12.5745	-0.56	0.0069	PGCP	NM_016134	Body
chr8:98361938-98361938	cg05313910	-11.0842	-0.45	0.0357
chr9:108209784-108209784	cg14341289	-13.5158	-0.48	0.0253	FSD1L;FSD1L;FSD1L	NM_001145313;NM_207647;NM_031919	TSS1500;TSS1500;TSS1500
chr9:134669414-134669414	cg13732164	-11.7869	-0.43	0.0446
chr9:13705641-13705641	cg14480035	-11.3093	-0.51	0.0152
chr9:141013537-141013537	cg00378292	-10.2546	-0.47	0.0291	CACNA1B	NM_000718	Body
chr9:4678949-4678949	cg01296653	-12.4292	-0.51	0.0151	CDC37L1	NM_017913	TSS1500
chr9:5510497-5510497	cg07211259	-12.4941	-0.48	0.0241	PDCD1LG2	NM_025239	TSS200
chr9:91369283-91369283	cg13552026	-18.0861	-0.48	0.023
chr9:96623032-96623032	cg14396892	-20.4367	-0.53	0.011
chr9:97758396-97758396	cg14503441	-15.8393	-0.43	0.0452	C9orf3	NM_032823	Body

## Sheet: Supplementary Table 2
CpG loci where DNA methylation positively correlated with age (p<0.05) and methylation change was more than 10% between the youngest and oldest child in the cohort
Coordinate (GRCh37/hg19)	Probe	Methylation change (%)	Spearman r	p-value	UCSC_RefGene_Name	UCSC_RefGene_Accession	UCSC_RefGene_Group
chr1:109191152-109191152	cg24511685	10.5165	0.62	0.0019	C1orf59;C1orf59	NM_144584;NM_001102592	3'UTR;3'UTR		DMRs (2 or more CpGs meeting selection criteria within 15kb) are highlighted; adjacent ones with different colors
chr1:111889533-111889533	cg10394832	10.6354	0.44	0.0407	C1orf88	NM_181643	Body
chr1:112042332-112042332	cg11533385	11.0138	0.44	0.0418	ADORA3;ADORA3;ADORA3	NM_001081976;NM_000677;NM_020683	Body;3'UTR;Body
chr1:116107015-116107015	cg19675142	10.0079	0.57	0.0054
chr1:118727834-118727834	cg23257935	16.6136	0.49	0.0202	SPAG17;SPAG17	NM_206996;NM_206996	5'UTR;1stExon
chr1:118727994-118727994	cg26100099	12.119	0.54	0.0102	SPAG17	NM_206996	TSS200
chr1:13839128-13839128	cg24594454	11.7376	0.6	0.0029
chr1:147826639-147826639	cg19639898	11.2679	0.49	0.0214
chr1:149670096-149670096	cg18184071	24.833	0.43	0.0458
chr1:152729200-152729200	cg18199386	11.1738	0.61	0.0024	KPRP	NM_001025231	TSS1500
chr1:156081268-156081268	cg26307728	10.3255	0.58	0.0049
chr1:156394727-156394727	cg01721149	20.7445	0.57	0.0059	C1orf61	NM_006365	5'UTR
chr1:161332601-161332601	cg08161491	12.1726	0.44	0.0395	SDHC;SDHC;SDHC;SDHC	NM_001035511;NM_001035512;NM_003001;NM_001035513	3'UTR;3'UTR;3'UTR;3'UTR
chr1:164325910-164325910	cg00973424	15.4924	0.45	0.0362
chr1:166851236-166851236	cg01422012	13.4749	0.48	0.023
chr1:170254397-170254397	cg01057196	19.541	0.76	0	LOC284688	NR_026957	TSS1500
chr1:170639289-170639289	cg11954332	12.4255	0.49	0.0205	PRRX1;PRRX1	NM_022716;NM_006902	Body;Body
chr1:171533729-171533729	cg16645440	11.1134	0.58	0.0046	BAT2L2	NM_015172	Body
chr1:171916040-171916040	cg18759260	13.214	0.53	0.012	DNM3;DNM3	NM_015569;NM_001136127	Body;Body
chr1:172352681-172352681	cg26020878	13.2998	0.43	0.0478	DNM3;DNM3	NM_015569;NM_001136127	Body;Body
chr1:173642785-173642785	cg03513606	26.1702	0.44	0.0384
chr1:176919570-176919570	cg24373540	13.8103	0.49	0.0203	ASTN1;ASTN1	NM_207108;NM_004319	Body;Body
chr1:178455800-178455800	cg21033965	11.2083	0.43	0.0462
chr1:1897585-1897585	cg24503109	12.6672	0.52	0.0136	KIAA1751	NM_001080484	Body
chr1:200580225-200580225	cg11721610	11.736	0.44	0.0389	KIF14	NM_014875	Body
chr1:201439001-201439001	cg00962755	15.6677	0.56	0.0065	PHLDA3	NM_012396	TSS1500
chr1:207224388-207224388	cg25594636	12.1389	0.51	0.0146	YOD1;YOD1	NM_018566;NM_018566	1stExon;5'UTR
chr1:207224567-207224567	cg23921459	13.5091	0.54	0.0096	YOD1	NM_018566	TSS200
chr1:212420632-212420632	cg02922776	13.6363	0.46	0.0319
chr1:213123436-213123436	cg01003599	12.0061	0.62	0.0021	VASH2;VASH2;VASH2	NM_001136475;NM_024749;NM_001136474	TSS1500;TSS1500;TSS1500
chr1:218711575-218711575	cg00558645	14.8455	0.43	0.0436
chr1:218990709-218990709	cg01603234	16.2937	0.43	0.0458
chr1:221818304-221818304	cg02919721	23.5769	0.54	0.0093
chr1:223183895-223183895	cg00939442	17.6475	0.59	0.0035
chr1:224806373-224806373	cg05785805	14.8421	0.45	0.0336	CNIH3	NM_152495	Body
chr1:226187852-226187852	cg04117530	19.7174	0.52	0.0125	C1orf55	NM_152608	TSS1500
chr1:226187876-226187876	cg13556548	35.6028	0.57	0.006	C1orf55	NM_152608	TSS1500
chr1:226188006-226188006	cg03081691	23.6065	0.55	0.0077	C1orf55	NM_152608	TSS1500
chr1:227754452-227754452	cg06882842	10.1031	0.49	0.0216	ZNF678;ZNF678	NM_178549;NR_033184	Body;Body
chr1:228194443-228194443	cg01051310	11.1046	0.57	0.0061	WNT3A	NM_033131	TSS1500
chr1:229543554-229543554	cg13850606	11.2098	0.45	0.0362
chr1:23495577-23495577	cg25610515	11.7964	0.63	0.0016	LUZP1;LUZP1	NM_033631;NM_001142546	TSS1500;TSS1500
chr1:236229267-236229267	cg23028178	10.4098	0.47	0.0267	NID1	NM_002508	TSS1500
chr1:236308094-236308094	cg04077303	21.3623	0.45	0.037	GPR137B	NM_003272	Body
chr1:243736307-243736307	cg24455383	10.4063	0.54	0.0093	AKT3;AKT3	NM_005465;NM_181690	Body;Body
chr1:247096088-247096088	cg23799440	12.1865	0.54	0.0097	AHCTF1	NM_015446	TSS1500
chr1:248683682-248683682	cg03623288	12.824	0.44	0.0395	OR2G6	NM_001013355	TSS1500
chr1:25828428-25828428	cg12211490	10.8386	0.55	0.0077
chr1:3273407-3273407	cg17493795	12.3726	0.65	0.001	PRDM16;PRDM16	NM_022114;NM_199454	Body;Body
chr1:33810859-33810859	cg15895925	10.7308	0.43	0.0471	PHC2;PHC2	NM_004427;NM_198040	5'UTR;Body
chr1:34642519-34642519	cg02656891	10.8559	0.47	0.0263	C1orf94;C1orf94	NM_032884;NM_001134734	5'UTR;TSS200
chr1:36786285-36786285	cg17942851	11.1873	0.49	0.0192	C1orf113;C1orf113	NM_024676;NM_001162530	Body;Body
chr1:40599011-40599011	cg08166631	14.8092	0.44	0.0421
chr1:44031300-44031300	cg23671221	11.0444	0.64	0.0013	PTPRF;PTPRF	NM_002840;NM_130440	Body;Body
chr1:44031309-44031309	cg15268136	12.7083	0.48	0.0251	PTPRF;PTPRF	NM_002840;NM_130440	Body;Body
chr1:44031756-44031756	cg22875872	15.6871	0.55	0.0077	PTPRF;PTPRF	NM_002840;NM_130440	Body;Body
chr1:44031826-44031826	cg10881128	20.6766	0.6	0.0033	PTPRF;PTPRF	NM_002840;NM_130440	Body;Body
chr1:45274099-45274099	cg11448683	11.1475	0.45	0.0375	TCTEX1D4;BTBD19	NM_001013632;NM_001136537	TSS1500;TSS200
chr1:46088541-46088541	cg03335125	11.3503	0.53	0.0121	CCDC17	NM_001114938	Body
chr1:53023509-53023509	cg22482048	10.2845	0.45	0.0349
chr1:54194919-54194919	cg20148127	11.5526	0.49	0.0195	GLIS1	NM_147193	5'UTR
chr1:58257201-58257201	cg00763223	15.4485	0.43	0.0481	DAB1;MIR548D2	NM_021080;NR_030385	5'UTR;Body
chr1:6268858-6268858	cg18235937	11.8154	0.47	0.0265	RNF207	NM_207396	Body
chr1:63782395-63782395	cg09456465	11.8711	0.45	0.0341
chr1:63782426-63782426	cg05719140	17.3917	0.42	0.0488
chr1:65086941-65086941	cg03330820	10.3881	0.51	0.0152	CACHD1	NM_020925	Body
chr1:65468460-65468460	cg14792081	26.3015	0.53	0.0103
chr1:779995-779995	cg16736630	10.6753	0.54	0.01	LOC643837	NR_015368	Body
chr1:79472361-79472361	cg04360793	15.752	0.58	0.0048	ELTD1;ELTD1	NM_022159;NM_022159	5'UTR;1stExon
chr1:79472408-79472408	cg15084543	14.222	0.52	0.0125	ELTD1;ELTD1	NM_022159;NM_022159	5'UTR;1stExon
chr1:86081443-86081443	cg01040434	10.1616	0.57	0.006
chr1:91171013-91171013	cg04567738	12.0654	0.47	0.0282
chr1:91175627-91175627	cg10621610	12.6198	0.46	0.0296
chr1:9243679-9243679	cg12385729	10.14	0.5	0.0168
chr10:105730465-105730465	cg12762527	14.2829	0.43	0.0475	SLK	NM_014720	Body
chr10:106495209-106495209	cg03175677	12.7882	0.54	0.0097	SORCS3	NM_014978	Body
chr10:11206792-11206792	cg25761326	18.6949	0.51	0.0143	CUGBP2;CUGBP2;CUGBP2;CUGBP2	NM_001025076;NM_006561;NM_001025077;NM_001083591	TSS200;Body;Body;TSS200
chr10:115805676-115805676	cg10415685	26.7812	0.49	0.0205	ADRB1;ADRB1	NM_000684;NM_000684	3'UTR;1stExon
chr10:118030292-118030292	cg01261351	10.1908	0.54	0.0098	GFRA1;GFRA1;GFRA1	NM_001145453;NM_005264;NM_145793	Body;Body;Body
chr10:118084587-118084587	cg02721176	17.8555	0.49	0.0212	C10orf96	NM_198515	Body
chr10:118429452-118429452	cg17349199	12.1237	0.49	0.0207	C10orf82;C10orf82	NM_144661;NM_144661	1stExon;5'UTR
chr10:118639701-118639701	cg19258348	20.0072	0.47	0.0289
chr10:120938899-120938899	cg15475650	16.678	0.55	0.0076	PRDX3;PRDX3	NM_014098;NM_006793	TSS1500;TSS1500
chr10:124638756-124638756	cg03804621	14.4495	0.49	0.0207	FAM24B;LOC399815	NM_152644;NR_027282	5'UTR;TSS1500
chr10:124638874-124638874	cg14374521	12.4938	0.56	0.007	FAM24B;LOC399815	NM_152644;NR_027282	5'UTR;TSS1500
chr10:124639110-124639110	cg15252215	12.2616	0.44	0.0387	LOC399815;FAM24B;FAM24B	NR_027282;NM_152644;NM_152644	TSS200;5'UTR;1stExon
chr10:124829211-124829211	cg02588889	18.5837	0.47	0.0272
chr10:129535893-129535893	cg26115633	11.2589	0.44	0.0401	FOXI2	NM_207426	1stExon
chr10:130009413-130009413	cg09953287	10.5199	0.52	0.0131
chr10:131401268-131401268	cg14475381	11.7813	0.7	0.0003	MGMT	NM_002412	Body
chr10:133156015-133156015	cg09005971	15.0017	0.45	0.0339
chr10:134736163-134736163	cg25361175	16.4887	0.5	0.0184
chr10:134736248-134736248	cg18705098	24.3089	0.55	0.008
chr10:134969984-134969984	cg06206793	13.9456	0.47	0.0276
chr10:135379213-135379213	cg14239307	11.8503	0.52	0.0132	SYCE1;SYCE1;SYCE1	NM_001143764;NM_001143763;NM_130784	TSS200;TSS200;5'UTR
chr10:135436063-135436063	cg14291745	12.5898	0.43	0.0475
chr10:14129104-14129104	cg16634545	11.6809	0.44	0.0407	FRMD4A	NM_018027	Body
chr10:15005691-15005691	cg09479793	20.8983	0.46	0.031	MEIG1	NM_001080836	5'UTR
chr10:22725451-22725451	cg16913841	29.572	0.53	0.0108
chr10:33518295-33518295	cg15809806	10.0189	0.47	0.0269	NRP1;NRP1;NRP1	NM_001024628;NM_003873;NM_001024629	Body;Body;Body
chr10:42970987-42970987	cg16482344	15.0508	0.49	0.0217	LOC84856	NR_026827	Body
chr10:47893488-47893488	cg20615655	17.4676	0.47	0.0287	FAM21B	NM_018232	TSS1500
chr10:60474759-60474759	cg00805496	10.2604	0.49	0.0197	LOC728640;BICC1	NR_027508;NM_001080512	TSS200;Body
chr10:60578284-60578284	cg09578524	10.1904	0.51	0.0142	BICC1	NM_001080512	Body
chr10:70712079-70712079	cg26026821	13.9919	0.53	0.0106
chr10:74498683-74498683	cg03717584	13.3019	0.57	0.006	CCDC109A	NM_138357	Body
chr10:7517833-7517833	cg18943588	10.8363	0.45	0.0354
chr10:75410026-75410026	cg17411546	20.7349	0.54	0.0099	SYNPO2L;SYNPO2L	NM_024875;NM_001114133	Body;Body
chr10:82204260-82204260	cg00277334	15.6916	0.45	0.0346
chr10:83625257-83625257	cg04169186	11.7638	0.54	0.01
chr10:94452311-94452311	cg00876273	34.3146	0.47	0.028	HHEX	NM_002729	Body
chr10:94452480-94452480	cg02185052	30.1121	0.42	0.0491	HHEX	NM_002729	Body
chr11:102826680-102826680	cg10085326	10.9144	0.47	0.0278	MMP13	NM_002427	TSS1500
chr11:105850589-105850589	cg11276420	10.8068	0.45	0.0354	GRIA4;GRIA4	NM_000829;NM_001077243	3'UTR;3'UTR
chr11:107578208-107578208	cg15603354	10.3754	0.51	0.0163	SLN	NM_003063	3'UTR
chr11:111126546-111126546	cg08919594	19.4813	0.46	0.03	C11orf53	NM_198498	TSS200
chr11:115630531-115630531	cg23651826	10.0615	0.52	0.0131
chr11:117190160-117190160	cg16864999	14.2127	0.57	0.0057
chr11:118048216-118048216	cg27646075	12.3182	0.51	0.0155	SCN2B	NM_004588	TSS1500
chr11:123295670-123295670	cg04786391	30.9757	0.73	0
chr11:123815202-123815202	cg08519008	11.8198	0.45	0.0362	OR6T1	NM_001005187	TSS1500
chr11:125656966-125656966	cg24859617	10.7505	0.5	0.0186	PATE3	NM_001129883	TSS1500
chr11:128694679-128694679	cg09971562	14.4214	0.62	0.0021
chr11:128694915-128694915	cg03898448	14.4962	0.48	0.0251
chr11:134608774-134608774	cg09414985	10.4125	0.44	0.0421
chr11:134945848-134945848	cg07363697	17.3985	0.6	0.003
chr11:18230494-18230494	cg10940997	10.2919	0.49	0.0212	LOC494141;LOC494141;LOC494141	NR_026564;NR_026541;NR_026563	TSS200;TSS200;TSS1500
chr11:20229879-20229879	cg21678813	19.5205	0.46	0.0326
chr11:22364293-22364293	cg24151995	13.9015	0.51	0.0165	SLC17A6	NM_020346	Body
chr11:2890082-2890082	cg23762359	16.3605	0.6	0.0032	KCNQ1DN	NR_024627	TSS1500
chr11:299564-299564	cg26152754	11.3818	0.46	0.0312	IFITM5	NM_001025295	TSS200
chr11:299629-299629	cg24503261	14.8517	0.58	0.0048	IFITM5	NM_001025295	TSS200
chr11:299668-299668	cg05733139	11.5819	0.5	0.0168	IFITM5	NM_001025295	TSS200
chr11:30038286-30038286	cg27319123	17.139	0.64	0.0015	KCNA4;KCNA4	NM_002233;NM_002233	1stExon;5'UTR
chr11:31844253-31844253	cg18463802	11.9888	0.49	0.0202
chr11:31848347-31848347	cg02865068	12.1038	0.74	0
chr11:34936862-34936862	cg07253191	12.6333	0.45	0.0352	PDHX;PDHX;APIP;PDHX	NM_003477;NM_001166158;NM_015957;NM_001135024	TSS1500;TSS1500;Body;TSS1500
chr11:41519708-41519708	cg14687029	11.9465	0.47	0.0282
chr11:4233502-4233502	cg26730416	13.5067	0.48	0.0241
chr11:44875388-44875388	cg19960899	12.9959	0.57	0.0052	TSPAN18	NM_130783	5'UTR
chr11:44978644-44978644	cg26677322	19.4312	0.52	0.0128
chr11:44978881-44978881	cg14223001	12.9774	0.55	0.0077
chr11:44979029-44979029	cg00792751	13.7687	0.47	0.0276
chr11:45599468-45599468	cg26314240	15.9336	0.75	0
chr11:64993076-64993076	cg19323951	18.0093	0.44	0.0404	SLC22A20	NM_001004326	Body
chr11:64993239-64993239	cg02675946	12.3888	0.48	0.0243	SLC22A20	NM_001004326	Body
chr11:64993281-64993281	cg27428304	14.682	0.48	0.0239	SLC22A20	NM_001004326	Body
chr11:6640996-6640996	cg25546539	12.34	0.44	0.0404	TPP1	NM_000391	TSS1500
chr11:67498316-67498316	cg23011899	12.2597	0.44	0.0387
chr11:6805701-6805701	cg04895001	20.3301	0.47	0.0263	OR2AG1	NM_001004489	TSS1500
chr11:69949774-69949774	cg13237021	10.1037	0.53	0.0103	ANO1;ANO1	NM_018043;NR_030691	Body;Body
chr11:74039508-74039508	cg06942262	12.9658	0.43	0.0436
chr11:74551157-74551157	cg07569293	13.9535	0.55	0.0076	RNF169	NM_001098638	3'UTR
chr11:77907332-77907332	cg12161971	11.0862	0.45	0.037	USP35	NM_020798	Body
chr11:80527133-80527133	cg23884423	11.1149	0.59	0.0038
chr11:8891157-8891157	cg08740309	11.2227	0.73	0.0001	ST5	NM_005418	5'UTR
chr12:109090588-109090588	cg08131499	10.6754	0.48	0.0236	CORO1C	NM_014325	Body
chr12:114660791-114660791	cg11813512	11.0141	0.48	0.0245
chr12:114839476-114839476	cg07658357	10.7395	0.49	0.0209	TBX5;TBX5;TBX5;TBX5	NM_000192;NM_181486;NM_080717;NM_080718	Body;Body;Body;Body
chr12:1157718-1157718	cg21648069	12.0305	0.54	0.0091	ERC1;ERC1;ERC1;ERC1;ERC1	NM_178039;NR_027948;NR_027949;NM_178040;NR_027946	Body;Body;Body;Body;Body
chr12:11653278-11653278	cg02621287	11.382	0.65	0.0009
chr12:119212160-119212160	cg24675150	10.9955	0.46	0.0331
chr12:120910288-120910288	cg21751525	10.0216	0.49	0.0203	DYNLL1	NM_001037494	5'UTR
chr12:121150686-121150686	cg06302566	11.8753	0.46	0.031	UNC119B	NM_001080533	Body
chr12:123754071-123754071	cg08696931	11.0863	0.5	0.0183	CDK2AP1	NM_004642	Body
chr12:132656788-132656788	cg20065153	11.5392	0.44	0.0415
chr12:132854031-132854031	cg11152667	11.2803	0.51	0.0142	GALNT9;LOC100130238	NM_001122636;NR_024563	Body;Body
chr12:133659856-133659856	cg14774371	10.5242	0.54	0.01	ZNF140	NM_003440	Body
chr12:15100977-15100977	cg05194864	11.8466	0.47	0.0291	ARHGDIB	NM_001175	Body
chr12:16726818-16726818	cg00558702	12.788	0.49	0.0209	LMO3;LMO3	NM_001001395;NM_018640	Body;Body
chr12:25102431-25102431	cg19008597	12.4705	0.63	0.0015	BCAT1	NM_005504	TSS200
chr12:25204332-25204332	cg21336300	15.9881	0.44	0.0427	LRMP	NM_006152	TSS1500
chr12:33590837-33590837	cg21043657	18.1299	0.57	0.0053	SYT10	NM_198992	Body
chr12:34464089-34464089	cg10588893	13.1748	0.48	0.0228
chr12:39981136-39981136	cg13406085	12.7161	0.66	0.0009	ABCD2	NM_005164	Body
chr12:49297569-49297569	cg22827806	11.9554	0.53	0.0114	CCDC65	NM_033124	TSS1500
chr12:52846088-52846088	cg13221107	15.8693	0.55	0.0075	KRT6B	NM_005555	TSS200
chr12:54360262-54360262	cg18824990	16.7615	0.55	0.0078	HOTAIR	NR_003716	Body
chr12:62585467-62585467	cg20010506	13.6503	0.68	0.0005	FAM19A2;FAM19A2	NM_178539;NM_178539	5'UTR;1stExon
chr12:64936808-64936808	cg20098848	14.5207	0.51	0.0152
chr12:67666891-67666891	cg11825675	18.3282	0.48	0.0237	CAND1	NM_018448	Body
chr13:100610616-100610616	cg13783434	13.3403	0.44	0.0418
chr13:100630316-100630316	cg25461801	10.6077	0.6	0.0032
chr13:108388828-108388828	cg25108085	19.0154	0.54	0.009	FAM155A	NM_001080396	Body
chr13:111932857-111932857	cg05472841	10.0937	0.42	0.0488	ARHGEF7;ARHGEF7;ARHGEF7;ARHGEF7;ARHGEF7	NM_001113511;NM_001113513;NM_001113512;NM_003899;NM_145735	Body;Body;Body;Body;Body
chr13:113496400-113496400	cg14870136	12.4758	0.51	0.0163	ATP11A;ATP11A	NM_015205;NM_032189	Body;Body
chr13:114760892-114760892	cg11875926	10.3783	0.48	0.0251	RASA3	NM_007368	Body
chr13:24552617-24552617	cg02106712	12.0218	0.43	0.0481
chr13:24734180-24734180	cg11072570	11.4593	0.7	0.0003	SPATA13;SPATA13	NM_001166271;NM_153023	TSS1500;TSS1500
chr13:25746297-25746297	cg17205928	10.5726	0.51	0.0146	FAM123A;FAM123A	NM_152704;NM_199138	TSS1500;TSS1500
chr13:26043472-26043472	cg12111714	17.776	0.52	0.0135	ATP8A2	NM_016529	Body
chr13:28493012-28493012	cg06106103	24.1134	0.43	0.0468	PDX1	NM_000209	TSS1500
chr13:28493404-28493404	cg21101465	15.6753	0.48	0.0224	PDX1	NM_000209	TSS1500
chr13:31380982-31380982	cg14822546	10.7542	0.43	0.0436
chr13:33646763-33646763	cg00069969	10.0918	0.7	0.0003
chr13:36430134-36430134	cg12206359	10.5713	0.53	0.0109	MIR548F5;DCLK1	NR_031646;NM_004734	Body;Body
chr13:36919674-36919674	cg20691205	12.5057	0.48	0.0239	SPG20;SPG20;SPG20;SPG20	NM_001142296;NM_001142294;NM_015087;NM_001142295	5'UTR;5'UTR;5'UTR;5'UTR
chr13:37202570-37202570	cg06796885	10.7176	0.44	0.0398
chr13:46550832-46550832	cg18355146	11.8487	0.59	0.004	ZC3H13	NM_015070	Body
chr13:49793170-49793170	cg07447742	17.5544	0.5	0.0184	MLNR	NM_001507	TSS1500
chr13:53173507-53173507	cg05335186	12.0503	0.58	0.005
chr13:53173898-53173898	cg12458913	13.4103	0.62	0.0023
chr13:53174319-53174319	cg00495681	12.911	0.49	0.0192
chr13:53602266-53602266	cg01098981	12.3494	0.54	0.0098	OLFM4	NM_006418	TSS1500
chr13:60516055-60516055	cg08580056	10.5625	0.5	0.018	DIAPH3;DIAPH3	NM_001042517;NM_030932	Body;Body
chr13:61987935-61987935	cg12581627	34.0783	0.5	0.0187	PCDH20	NM_022843	Body
chr13:67101887-67101887	cg15585332	14.4728	0.63	0.0017	PCDH9;PCDH9	NM_203487;NM_020403	Body;Body
chr13:84455651-84455651	cg22057720	16.5339	0.52	0.0132	SLITRK1;SLITRK1	NM_052910;NM_052910	1stExon;5'UTR
chr13:96204978-96204978	cg25032595	11.3545	0.48	0.0236	CLDN10;CLDN10;CLDN10;CLDN10	NM_006984;NM_006984;NM_182848;NM_001160100	5'UTR;1stExon;Body;Body
chr13:96651633-96651633	cg19963120	13.2951	0.42	0.0488	UGGT2	NM_020121	Body
chr13:98148692-98148692	cg00076216	11.7406	0.43	0.0443
chr13:99714609-99714609	cg08599355	23.3075	0.48	0.0226	DOCK9;DOCK9	NM_015296;NM_001130049	Body;Body
chr14:100744154-100744154	cg12965833	14.7007	0.53	0.0108	YY1	NM_003403	3'UTR
chr14:101923256-101923256	cg20981086	12.1859	0.64	0.0014
chr14:102027660-102027660	cg02287710	11.0986	0.65	0.0011	DIO3;MIR1247	NM_001362;NR_031649	TSS200;TSS1500
chr14:103868351-103868351	cg04258520	15.7322	0.6	0.0033	MARK3;MARK3;MARK3;MARK3;MARK3	NM_001128919;NM_002376;NM_001128918;NM_001128920;NM_001128921	Body;Body;Body;Body;Body
chr14:105667315-105667315	cg01660716	11.3619	0.51	0.0159
chr14:106167949-106167949	cg19882132	17.1445	0.44	0.0384
chr14:21093818-21093818	cg16003832	11.4647	0.54	0.0102
chr14:21317205-21317205	cg05866150	24.7067	0.44	0.0427
chr14:22464490-22464490	cg21853587	11.1658	-0.45	0.0365
chr14:22689870-22689870	cg19901940	17.4304	0.5	0.0183
chr14:23586812-23586812	cg11070172	11.5912	0.47	0.0269	CEBPE	NM_001805	Body
chr14:24804930-24804930	cg08218799	10.4244	0.53	0.0119	ADCY4	NM_139247	TSS1500
chr14:34266747-34266747	cg20040626	11.1555	0.6	0.0029	NPAS3;NPAS3;NPAS3;NPAS3	NM_001164749;NM_173159;NM_001165893;NM_022123	Body;Body;Body;Body
chr14:36976428-36976428	cg26002259	11.7878	0.45	0.0375	SFTA3	NM_001101341	Body
chr14:36993517-36993517	cg18468354	14.5136	0.57	0.0052
chr14:37053664-37053664	cg13546414	16.5815	0.46	0.0305
chr14:37123778-37123778	cg07068674	22.0003	0.44	0.0381
chr14:37124247-37124247	cg19688403	14.3756	0.48	0.0228
chr14:38725536-38725536	cg04681600	11.5365	0.51	0.0146	CLEC14A;CLEC14A	NM_175060;NM_175060	1stExon;5'UTR
chr14:38725650-38725650	cg13643452	18.9633	0.46	0.031	CLEC14A	NM_175060	TSS200
chr14:38725750-38725750	cg18403361	21.2323	0.53	0.0104	CLEC14A	NM_175060	TSS200
chr14:42091070-42091070	cg19651291	14.6975	0.59	0.0037	LRFN5	NM_152447	5'UTR
chr14:45619710-45619710	cg04395431	15.7026	0.5	0.0183	FANCM	NM_020937	Body
chr14:51101635-51101635	cg26422329	19.7968	0.47	0.0278	SAV1	NM_021818	3'UTR
chr14:52211579-52211579	cg16685608	12.8275	0.45	0.0365
chr14:59183596-59183596	cg13972423	52.4795	0.53	0.0121
chr14:63670940-63670940	cg08253374	16.069	0.5	0.0189	RHOJ	NM_020663	TSS1500
chr14:72945461-72945461	cg01775802	12.3258	0.45	0.0336	RGS6	NM_004296	Body
chr14:73384273-73384273	cg26215869	19.197	0.47	0.0282
chr14:73712491-73712491	cg09636214	10.5493	0.56	0.0068	PAPLN	NM_173462	Body
chr14:76580302-76580302	cg22823273	14.5968	0.48	0.0239
chr14:78108523-78108523	cg19091403	17.1626	0.43	0.0465
chr14:96978537-96978537	cg10362113	11.1376	0.44	0.0415	PAPOLA	NM_032632	Body
chr14:97208170-97208170	cg08682607	10.8049	0.45	0.0336
chr15:23807234-23807234	cg13423098	10.2449	0.48	0.0236
chr15:24142920-24142920	cg06013632	10.9578	0.46	0.031
chr15:25123381-25123381	cg08560373	20.2779	0.46	0.0319	SNRPN;SNRPN;SNRPN;SNRPN	NM_022805;NM_022808;NM_022807;NM_022806	5'UTR;5'UTR;5'UTR;5'UTR
chr15:25513376-25513376	cg09661984	16.4318	0.74	0	HBII-52-46	NR_003499	TSS1500
chr15:26360752-26360752	cg13324902	44.1224	0.65	0.001
chr15:27111749-27111749	cg14417760	23.7541	0.46	0.0312	GABRA5;GABRA5	NM_001165037;NM_000810	TSS1500;TSS200
chr15:27111774-27111774	cg05614333	15.7445	0.55	0.0085	GABRA5;GABRA5	NM_001165037;NM_000810	TSS1500;TSS200
chr15:27212911-27212911	cg13563725	11.383	0.44	0.043
chr15:27215952-27215952	cg21711132	12.8806	0.58	0.0048	GABRG3	NM_033223	TSS1500
chr15:27215997-27215997	cg03024760	10.3252	0.5	0.0189	GABRG3	NM_033223	TSS1500
chr15:33602821-33602821	cg12860391	10.0817	0.6	0.0029	RYR3	NM_001036	TSS1500
chr15:35045695-35045695	cg18920097	15.7723	0.46	0.031	GJD2	NM_020660	Body
chr15:35262789-35262789	cg11062168	10.44	0.48	0.0253	AQR	NM_014691	TSS1500
chr15:38745743-38745743	cg24663514	12.474	0.51	0.0154	FAM98B;FAM98B	NM_173611;NM_001042429	TSS1500;TSS1500
chr15:43889864-43889864	cg14579389	12.8913	0.75	0	CKMT1B	NM_020990	Body
chr15:44120341-44120341	cg00074771	20.0207	0.56	0.0069	WDR76;WDR76	NM_024908;NM_001167941	Body;Body
chr15:47624584-47624584	cg16425161	17.6024	0.47	0.0267
chr15:48470794-48470794	cg05243389	17.2391	0.46	0.0329	MYEF2	NM_016132	TSS1500
chr15:52267193-52267193	cg14239359	16.1232	0.53	0.0121
chr15:53084679-53084679	cg25402787	12.1183	0.61	0.0028
chr15:53087316-53087316	cg09481404	13.4584	0.45	0.0344
chr15:53087487-53087487	cg08867241	11.2998	0.47	0.0291
chr15:58361558-58361558	cg22931287	14.0378	0.49	0.0195
chr15:60284643-60284643	cg07078735	11.7105	0.48	0.0239
chr15:62357710-62357710	cg27197276	12.6483	0.46	0.0298	C2CD4A	NM_207322	TSS1500
chr15:67574897-67574897	cg22410743	23.5241	0.45	0.0334	IQCH;IQCH	NM_001031715;NM_022784	Body;Body
chr15:78911099-78911099	cg08701566	12.9904	0.62	0.0022	CHRNA3;CHRNA3	NM_000743;NM_001166694	Body;Body
chr15:79092878-79092878	cg12645284	19.3458	0.53	0.0106	ADAMTS7	NM_014272	Body
chr15:80765904-80765904	cg27332878	10.2814	0.49	0.0205	ARNT2	NM_014862	Body
chr15:83790470-83790470	cg19899322	12.4701	0.46	0.0324	TM6SF1;TM6SF1	NM_023003;NM_001144903	Body;Body
chr15:83954392-83954392	cg00768409	13.5226	0.44	0.0412	BNC1	NM_001717	TSS1500
chr15:85365662-85365662	cg01390082	18.4485	0.44	0.0424	ALPK3	NM_020778	Body
chr15:89634741-89634741	cg17860366	11.3397	0.44	0.0424	ABHD2;ABHD2	NM_152924;NM_007011	5'UTR;5'UTR
chr15:89682168-89682168	cg00089162	14.0555	0.5	0.0166	ABHD2;ABHD2	NM_152924;NM_007011	Body;Body
chr15:93614758-93614758	cg06678242	10.6957	0.5	0.018	RGMA;RGMA;RGMA;RGMA;RGMA;RGMA	NM_001166289;NM_001166288;NM_020211;NM_001166286;NM_001166283;NM_001166287	Body;Body;Body;Body;Body;Body
chr15:97629221-97629221	cg13102348	10.7216	0.43	0.0478
chr15:99215867-99215867	cg20239485	11.7064	0.49	0.0199	IGF1R	NM_000875	Body
chr15:99256874-99256874	cg03795574	10.1275	0.48	0.0223	IGF1R	NM_000875	Body
chr16:12184133-12184133	cg01574788	11.7311	0.51	0.0159	SNX29	NM_001080530	Body
chr16:24372426-24372426	cg09358975	12.7219	0.62	0.0021	CACNG3	NM_006539	Body
chr16:28877881-28877881	cg10098582	10.0309	0.48	0.0243	SH2B1;SH2B1;SH2B1;SH2B1;SH2B1	NM_001145796;NM_001145797;NM_001145795;NM_001145812;NM_015503	Body;Body;Body;Body;1stExon
chr16:30043250-30043250	cg02190038	12.5415	0.58	0.0049	FAM57B	NM_031478	TSS1500
chr16:3018104-3018104	cg09660145	10.7055	0.44	0.0427	KREMEN2;KREMEN2;PAQR4	NM_024507;NM_172229;NM_152341	3'UTR;3'UTR;TSS1500
chr16:30572929-30572929	cg00301396	10.9275	0.51	0.0155
chr16:30686562-30686562	cg00336022	10.6054	0.55	0.0085
chr16:31235824-31235824	cg10085057	15.0786	0.45	0.0375	TRIM72	NM_001008274	Body
chr16:31439393-31439393	cg09117448	10.5089	0.45	0.0373	COX6A2	NM_005205	Body
chr16:31580590-31580590	cg10222027	11.8261	0.43	0.0452	CSDAP1	NR_027011	Body
chr16:31581150-31581150	cg02531193	20.4038	0.51	0.0159	CSDAP1	NR_027011	TSS1500
chr16:33817457-33817457	cg08214455	12.9883	0.45	0.0349
chr16:34208469-34208469	cg07646362	10.5102	0.58	0.005
chr16:34407918-34407918	cg14125292	10.8167	0.48	0.0236
chr16:34442090-34442090	cg07425171	10.4039	0.5	0.0178
chr16:34741493-34741493	cg05007325	11.8822	0.7	0.0003
chr16:4587854-4587854	cg12031863	10.0597	0.44	0.0392	C16orf5	NM_013399	5'UTR
chr16:46607903-46607903	cg03794981	13.3306	0.43	0.0452
chr16:46919112-46919112	cg03533472	13.3617	0.44	0.0384	GPT2;GPT2;GPT2	NM_133443;NM_001142466;NM_001142466	Body;1stExon;5'UTR
chr16:51188697-51188697	cg00683332	11.823	0.5	0.0187
chr16:54574605-54574605	cg02981942	14.5663	0.49	0.0217
chr16:55362754-55362754	cg04834436	10.6765	0.48	0.0249	IRX6	NM_024335	Body
chr16:56651049-56651049	cg00809164	13.6595	0.5	0.0184	MT1L	NR_001447	TSS1500
chr16:57729104-57729104	cg01813965	61.2024	0.52	0.013	CCDC135	NM_032269	5'UTR
chr16:57729107-57729107	cg09306696	42.2248	0.46	0.031	CCDC135	NM_032269	5'UTR
chr16:58059154-58059154	cg08877948	25.0878	0.47	0.028	MMP15	NM_002428	TSS200
chr16:68269694-68269694	cg04079760	11.5306	0.45	0.0339	ESRP2	NM_024939	Body
chr16:75019382-75019382	cg05828191	17.7694	0.66	0.0007	WDR59	NM_030581	TSS1500
chr16:78420476-78420476	cg02546607	11.4536	0.5	0.0186	WWOX	NM_016373	Body
chr16:84065224-84065224	cg03282543	14.9212	0.45	0.0373	SLC38A8	NM_001080442	Body
chr16:85242503-85242503	cg09644806	61.1489	0.46	0.0298
chr16:86112019-86112019	cg06072835	10.1304	0.55	0.008
chr16:88091767-88091767	cg16672956	11.0656	0.54	0.009	BANP;BANP	NM_017869;NM_079837	Body;Body
chr17:113262-113262	cg16767880	58.9123	0.45	0.0367	RPH3AL	NM_006987	Body
chr17:17875932-17875932	cg20650513	16.0512	0.48	0.0245	TOM1L2;LRRC48;LRRC48;TOM1L2;LRRC48;LRRC48	NM_001082968;NM_031294;NM_001130091;NM_001033551;NM_001130092;NM_001130090	TSS200;TSS200;TSS200;TSS200;TSS200;TSS200
chr17:18023971-18023971	cg04398451	15.2442	0.44	0.0421	MYO15A	NM_016239	Body
chr17:22203008-22203008	cg05210606	12.4598	0.57	0.006
chr17:22203149-22203149	cg14770527	12.5986	0.52	0.0122
chr17:28037399-28037399	cg17036458	10.2255	0.44	0.0415	SSH2	NM_033389	Body
chr17:30658537-30658537	cg04936619	16.6037	0.5	0.0171	C17orf75	NM_022344	3'UTR
chr17:35242555-35242555	cg08659204	11.6951	0.58	0.0051
chr17:39254747-39254747	cg05510560	20.4331	0.42	0.0498	KRTAP4-8	NM_031960	TSS1500
chr17:41277213-41277213	cg19088651	13.7247	0.43	0.0462	BRCA1;BRCA1;BRCA1;BRCA1;BRCA1;NBR2;BRCA1	NM_007300;NR_027676;NM_007294;NM_007298;NM_007299;NR_003108;NM_007297	5'UTR;Body;5'UTR;TSS1500;5'UTR;TSS1500;5'UTR
chr17:45773559-45773559	cg19375196	14.8593	0.59	0.0037	TBKBP1	NM_014726	1stExon
chr17:45773570-45773570	cg02886591	11.2835	0.58	0.0049	TBKBP1	NM_014726	1stExon
chr17:4649076-4649076	cg04387835	10.8896	0.66	0.0008	ZMYND15;ZMYND15	NM_001136046;NM_032265	Body;Body
chr17:46825371-46825371	cg02721902	10.0763	0.55	0.0085
chr17:47869962-47869962	cg10095057	17.4478	0.69	0.0004	MYST2	NM_007067	Body
chr17:4855149-4855149	cg27207493	18.4803	0.43	0.0468	ENO3;ENO3	NM_001976;NM_053013	Body;Body
chr17:49717648-49717648	cg25063515	17.2999	0.6	0.0035	CA10;CA10;CA10	NM_001082533;NM_020178;NM_001082534	Body;Body;Body
chr17:57216484-57216484	cg10325038	30.8367	0.59	0.0038	SKA2;SKA2;MIR454	NM_182620;NM_001100595;NR_030411	Body;Body;TSS1500
chr17:57861641-57861641	cg02766539	12.4374	0.59	0.0039	TMEM49	NM_030938	Body
chr17:59530104-59530104	cg26130488	13.3076	0.42	0.0495
chr17:59658584-59658584	cg16916165	16.3038	0.58	0.0045
chr17:6160770-6160770	cg25503149	11.0533	0.48	0.0232
chr17:61711557-61711557	cg22596016	11.2049	0.56	0.0069	MAP3K3;MAP3K3	NM_002401;NM_203351	Body;Body
chr17:6616425-6616425	cg10043253	13.6344	0.56	0.0067	SLC13A5;SLC13A5	NM_177550;NM_001143838	Body;Body
chr17:67138637-67138637	cg04380955	10.9279	0.61	0.0028	ABCA6	NM_080284	TSS1500
chr17:6817409-6817409	cg06662976	14.1935	0.43	0.0458
chr17:6817578-6817578	cg10721538	27.7147	0.47	0.0274
chr17:7341936-7341936	cg13194425	10.1647	0.45	0.0341	FGF11	NM_004112	TSS1500
chr17:77924665-77924665	cg17295878	10.0145	0.49	0.0216	TBC1D16	NM_019020	Body
chr17:78166148-78166148	cg09669754	15.0425	0.48	0.0243	CARD14;CARD14	NM_052819;NM_024110	Body;Body
chr17:7976285-7976285	cg19437868	10.2259	0.43	0.0468	ALOX12B	NM_001139	Body
chr17:7976456-7976456	cg20161976	18.1855	0.57	0.0059	ALOX12B	NM_001139	Body
chr17:977984-977984	cg13973942	12.8744	0.45	0.0336	ABR;ABR;ABR	NM_021962;NM_001092;NM_001159746	Body;Body;Body
chr18:1359764-1359764	cg18825414	12.2733	0.45	0.0365	C18orf2;C18orf2;C18orf2;C18orf2	NR_023925;NR_023928;NR_023927;NR_023926	TSS200;TSS200;TSS200;TSS200
chr18:19176371-19176371	cg21321768	12.3235	0.6	0.003	ESCO1	NM_052911	5'UTR
chr18:19410150-19410150	cg17106157	12.6819	0.5	0.0187	MIR1-2;MIB1	NR_029662;NM_020774	TSS1500;Body
chr18:29710780-29710780	cg16292851	10.066	0.57	0.006	RNF138;RNF138	NM_198128;NM_016271	3'UTR;3'UTR
chr18:33078241-33078241	cg22151773	10.7012	0.52	0.0138	INO80C;INO80C	NM_194281;NM_001098817	TSS1500;TSS1500
chr18:44786426-44786426	cg24546155	12.0109	0.46	0.0303
chr18:45275452-45275452	cg16870867	12.856	0.56	0.0069
chr18:49868101-49868101	cg25602457	11.4483	0.49	0.0205	DCC	NM_005215	Body
chr18:51751750-51751750	cg25192916	11.456	0.57	0.0058	MBD2;MBD2	NM_003927;NM_015832	TSS1500;TSS1500
chr18:5196397-5196397	cg22105145	10.3442	0.55	0.0087	LOC642597	NM_001145194	Body
chr18:5197559-5197559	cg25349154	11.1119	0.58	0.0046	LOC642597	NM_001145194	TSS1500
chr18:53447596-53447596	cg07519816	10.3515	0.44	0.0424
chr18:56296094-56296094	cg14386193	12.3985	0.51	0.0143	ALPK2;ALPK2	NM_052947;NM_052947	1stExon;5'UTR
chr18:57640290-57640290	cg05769108	10.6852	0.43	0.0478
chr18:5892245-5892245	cg17586988	10.6488	0.48	0.0226	TMEM200C	NM_001080209	TSS200
chr18:6417130-6417130	cg23623214	16.7253	0.44	0.0427
chr18:77554583-77554583	cg16357382	26.8903	0.57	0.0057
chr18:77616694-77616694	cg00383167	20.4208	0.63	0.0016
chr18:77616832-77616832	cg14294910	24.0392	0.58	0.005
chr19:1542897-1542897	cg00392196	11.7951	0.47	0.0255
chr19:16529002-16529002	cg21067775	11.7829	0.45	0.0352	EPS15L1	NM_021235	Body
chr19:1715374-1715374	cg17968943	13.4931	0.45	0.0341
chr19:19844224-19844224	cg08522143	16.4182	0.57	0.006	ZNF14	NM_021030	TSS1500
chr19:20349250-20349250	cg19847283	12.9005	0.52	0.0124
chr19:21541772-21541772	cg22638505	13.6553	0.56	0.0071	ZNF738	NR_027130	Body
chr19:22193540-22193540	cg09418063	12.3624	0.62	0.0021	ZNF208	NM_007153	Body
chr19:22235454-22235454	cg06852575	10.5864	0.54	0.01	ZNF257	NM_033468	Body
chr19:22469860-22469860	cg15413034	15.3638	0.59	0.004
chr19:2859153-2859153	cg12277416	10.5269	0.46	0.0314
chr19:306671-306671	cg07618159	13.6546	0.53	0.012	MIER2	NM_017550	3'UTR
chr19:3211410-3211410	cg11925620	17.2533	0.47	0.0265
chr19:37894762-37894762	cg14942863	14.4667	0.55	0.0081
chr19:40871823-40871823	cg08360726	10.9368	0.57	0.0061	PLD3;PLD3	NM_012268;NM_001031696	5'UTR;5'UTR
chr19:41316697-41316697	cg13791183	12.7372	0.45	0.0365
chr19:41641434-41641434	cg18339788	23.0278	0.47	0.0267
chr19:44324467-44324467	cg14794281	33.3755	0.45	0.0346	LYPD5	NM_182573	5'UTR
chr19:48917816-48917816	cg10161743	13.3664	0.47	0.0255	GRIN2D	NM_000836	Body
chr19:50037079-50037079	cg19340420	15.9521	0.61	0.0024	RCN3	NM_020650	Body
chr19:50037085-50037085	cg15963326	12.2241	0.61	0.0027	RCN3	NM_020650	Body
chr19:50393653-50393653	cg05213896	16.4719	0.53	0.0109	IL4I1;IL4I1	NM_152899;NM_172374	Body;Body
chr19:51231968-51231968	cg07809484	12.3142	0.58	0.0051
chr19:52227309-52227309	cg17657179	13.1582	0.52	0.0137	HAS1	NM_001523	TSS200
chr19:52409580-52409580	cg08052120	12.5505	0.52	0.0122	ZNF649	NM_023074	TSS1500
chr19:52452317-52452317	cg04645914	15.593	0.76	0
chr19:52452447-52452447	cg24886257	11.541	0.52	0.0134
chr19:53142106-53142106	cg15008743	16.0299	0.77	0	ZNF83;ZNF83;ZNF83;ZNF83;ZNF83;ZNF83;ZNF83;ZNF83	NR_003936;NM_001105553;NM_001105552;NM_001105549;NM_018300;NM_001105550;NM_001105551;NM_001105554	Body;TSS1500;TSS1500;TSS1500;TSS1500;TSS1500;TSS1500;TSS1500
chr19:53447272-53447272	cg19369616	14.266	0.59	0.0041	ZNF321	NM_203307	TSS1500
chr19:53540902-53540902	cg07962338	10.0152	0.48	0.0223
chr19:53541186-53541186	cg02758612	22.7985	0.6	0.0034
chr19:53832577-53832577	cg02258724	17.3839	0.7	0.0003
chr19:53832670-53832670	cg15061569	15.6848	0.43	0.0455
chr19:54387435-54387435	cg26478297	16.0446	0.46	0.0312	PRKCG	NM_002739	Body
chr19:54445377-54445377	cg19925849	12.2109	0.45	0.037	CACNG7	NM_031896	Body
chr19:54485509-54485509	cg02694017	11.2498	0.52	0.0137	CACNG8;MIR935	NM_031895;NR_030632	Body;TSS200
chr19:55314542-55314542	cg13444135	11.8594	0.42	0.0495	KIR2DL4;KIR2DL4;KIR2DL4	NM_001080770;NM_001080772;NM_002255	TSS1500;TSS1500;TSS1500
chr19:56904945-56904945	cg02763101	17.2039	0.46	0.0319	ZNF582	NM_144690	TSS200
chr19:57079381-57079381	cg26982279	16.7361	0.5	0.019	ZNF470;ZNF470	NM_001001668;NM_001001668	1stExon;5'UTR
chr19:57154095-57154095	cg21911858	10.4279	0.43	0.0468
chr19:57183016-57183016	cg08158952	15.4778	0.53	0.0106	ZNF835	NM_001005850	Body
chr19:57276794-57276794	cg06585566	12.9452	0.51	0.0163
chr19:57306847-57306847	cg16519742	11.023	0.64	0.0014	ZIM2;ZIM2;ZIM2	NM_001146326;NM_001146327;NM_015363	Body;Body;Body
chr19:57352807-57352807	cg26917367	14.5517	0.55	0.0086	PEG3;PEG3;ZIM2;ZIM2;PEG3;ZIM2;MIMT1;PEG3	NM_001146184;NM_001146185;NM_001146326;NM_001146327;NM_006210;NM_015363;NR_024059;NM_001146187	TSS1500;TSS1500;TSS1500;TSS1500;TSS1500;TSS1500;Body;TSS1500
chr19:57683843-57683843	cg13337047	11.5949	0.6	0.0033
chr19:58171878-58171878	cg07974627	19.2252	0.66	0.0009
chr19:58513203-58513203	cg11740087	16.844	0.53	0.0107	ZNF606	NM_025027	5'UTR
chr19:58545001-58545001	cg14886059	21.9237	0.58	0.0044	ZSCAN1	NM_182572	TSS1500
chr19:58545122-58545122	cg11312896	14.4738	0.51	0.015	ZSCAN1	NM_182572	TSS1500
chr19:58545837-58545837	cg05983315	15.1622	0.5	0.0177	ZSCAN1	NM_182572	5'UTR
chr19:58556185-58556185	cg27520319	13.1934	0.45	0.0362	ZSCAN1	NM_182572	Body
chr19:58665643-58665643	cg14340463	20.0709	0.48	0.0234
chr19:58716032-58716032	cg22720790	16.379	0.54	0.0101	ZNF274;ZNF274;ZNF274	NM_133502;NM_016325;NM_016324	Body;Body;5'UTR
chr19:58716135-58716135	cg03099728	10.6161	0.61	0.0026	ZNF274;ZNF274;ZNF274	NM_133502;NM_016325;NM_016324	Body;Body;5'UTR
chr19:6721955-6721955	cg14279361	20.975	0.44	0.0389	C3	NM_000064	TSS1500
chr19:6926394-6926394	cg26754472	11.4446	0.53	0.0112	EMR1	NM_001974	Body
chr19:8619925-8619925	cg14110168	27.7954	0.46	0.0305	MYO1F	NM_012335	Body
chr19:9473684-9473684	cg08065231	15.5668	0.45	0.0367	ZNF177	NM_003451	TSS200
chr19:9473688-9473688	cg09578475	14.4016	0.43	0.0475	ZNF177	NM_003451	TSS200
chr19:9842728-9842728	cg21874682	10.5924	0.58	0.0047
chr2:10760591-10760591	cg26569634	15.5844	0.57	0.0058	NOL10	NM_024894	Body
chr2:116152853-116152853	cg06119201	14.2252	0.65	0.001	DPP10;DPP10	NM_001004360;NM_020868	Body;Body
chr2:1286397-1286397	cg09294347	19.5333	0.44	0.0424	SNTG2	NM_018968	Body
chr2:128851969-128851969	cg08693082	13.3758	0.46	0.0293	UGGT1;UGGT1	NM_020120;NR_027671	Body;Body
chr2:131094827-131094827	cg01331772	18.0871	0.43	0.0443
chr2:144635077-144635077	cg13522279	16.2091	0.55	0.0077
chr2:151395457-151395457	cg19035395	13.0825	0.52	0.0129
chr2:152195702-152195702	cg14760176	17.6515	0.48	0.0232
chr2:161255064-161255064	cg07074974	20.6123	0.46	0.0329	RBMS1;RBMS1	NM_002897;NM_016836	Body;Body
chr2:162102947-162102947	cg12727138	10.6943	0.59	0.0039
chr2:172650722-172650722	cg23098068	11.3697	0.59	0.0039	SLC25A12	NM_003705	Body
chr2:172776401-172776401	cg02155405	11.2723	0.44	0.0395
chr2:174836197-174836197	cg20342255	11.9948	0.74	0
chr2:17492831-17492831	cg01139101	14.3058	0.46	0.0314
chr2:175457569-175457569	cg07502208	10.9331	0.5	0.0181	WIPF1;WIPF1	NM_003387;NM_001077269	5'UTR;5'UTR
chr2:176977220-176977220	cg00786305	18.2435	0.54	0.0096
chr2:176977285-176977285	cg09615505	19.6745	0.57	0.0055
chr2:176977374-176977374	cg12504882	10.3705	0.5	0.0174
chr2:176977773-176977773	cg02164225	12.3188	0.48	0.0226
chr2:177004998-177004998	cg24058732	14.8965	0.43	0.0465
chr2:177503592-177503592	cg07077965	12.431	0.5	0.0177
chr2:180307728-180307728	cg17100158	12.9496	0.42	0.0495	ZNF385B;ZNF385B;ZNF385B	NM_152520;NM_001113397;NM_001113398	3'UTR;3'UTR;3'UTR
chr2:182543233-182543233	cg16640855	16.0853	0.49	0.0195	NEUROD1	NM_002500	Body
chr2:183732062-183732062	cg04037038	12.2602	0.55	0.0082	FRZB	NM_001463	TSS1500
chr2:187713554-187713554	cg26033349	10.6569	0.51	0.0165	ZSWIM2	NM_182521	Body
chr2:190688351-190688351	cg11296782	23.6743	0.46	0.0312	PMS1;PMS1;PMS1	NM_001128143;NM_001128144;NM_000534	Body;Body;Body
chr2:190744274-190744274	cg21751145	10.1903	0.43	0.0471
chr2:19561482-19561482	cg24879782	11.6264	0.44	0.0387
chr2:198506530-198506530	cg25517103	11.3663	0.55	0.008	RFTN2	NM_144629	Body
chr2:200468832-200468832	cg20636352	10.7387	0.57	0.0059
chr2:201262081-201262081	cg18189288	11.9692	0.64	0.0013	SPATS2L;SPATS2L;SPATS2L;SPATS2L	NM_001100422;NM_015535;NM_001100424;NM_001100423	Body;Body;Body;Body
chr2:20144847-20144847	cg13734338	11.9542	0.71	0.0002	WDR35;WDR35	NM_020779;NM_001006657	Body;Body
chr2:202907179-202907179	cg17370823	11.5712	0.53	0.0118
chr2:208014177-208014177	cg19361800	11.9256	0.66	0.0008	KLF7	NM_003709	Body
chr2:212786221-212786221	cg05844832	13.6102	0.48	0.0223	ERBB4;ERBB4	NM_005235;NM_001042599	Body;Body
chr2:215675637-215675637	cg24607575	12.9032	0.46	0.0307	BARD1	NM_000465	TSS1500
chr2:216946718-216946718	cg16925210	10.7553	0.44	0.043	PECR;TMEM169;TMEM169;TMEM169;TMEM169	NM_018441;NM_001142311;NM_001142312;NM_138390;NM_001142310	TSS200;5'UTR;5'UTR;5'UTR;5'UTR
chr2:216982485-216982485	cg17934277	15.9128	0.49	0.0205	XRCC5	NM_021141	Body
chr2:217856028-217856028	cg00308021	26.5122	0.44	0.0384
chr2:233352776-233352776	cg15986413	10.1182	0.49	0.0202	ECEL1	NM_004826	TSS1500
chr2:237069779-237069779	cg22858394	13.836	0.43	0.0446
chr2:237088661-237088661	cg08640046	10.1074	0.45	0.0365
chr2:237416338-237416338	cg17397592	12.2532	0.43	0.0436	IQCA1	NM_024726	TSS1500
chr2:237768519-237768519	cg04170238	11.537	0.55	0.0083
chr2:30142742-30142742	cg10179251	12.0698	0.44	0.0407	ALK	NM_004304	Body
chr2:31605342-31605342	cg23820244	11.4514	0.44	0.0418	XDH	NM_000379	Body
chr2:32446172-32446172	cg10277836	11.9443	0.47	0.0287	SLC30A6	NM_017964	3'UTR
chr2:33827715-33827715	cg01371420	11.5239	0.51	0.0145
chr2:38301756-38301756	cg09799983	12.6504	0.5	0.0186	CYP1B1	NM_000104	Body
chr2:45160093-45160093	cg23325963	10.5959	0.52	0.0123
chr2:47799268-47799268	cg14758072	10.7466	0.55	0.0081
chr2:50575324-50575324	cg02495518	15.4319	0.59	0.0037	NRXN1;NRXN1;NRXN1	NM_004801;NM_001135659;NM_138735	Body;Body;TSS1500
chr2:50575326-50575326	cg04707706	26.6208	0.61	0.0026	NRXN1;NRXN1;NRXN1	NM_004801;NM_001135659;NM_138735	Body;Body;TSS1500
chr2:53107842-53107842	cg07782112	27.768	0.45	0.0336
chr2:55450737-55450737	cg02271560	28.5395	0.5	0.0177	C2orf63;C2orf63	NM_152385;NM_001135598	5'UTR;5'UTR
chr2:55515029-55515029	cg26821758	15.2239	0.46	0.03	CCDC88A;CCDC88A	NM_018084;NM_001135597	3'UTR;3'UTR
chr2:56229060-56229060	cg02071553	10.894	0.59	0.0041	MIR216B	NR_030623	TSS1500
chr2:60593185-60593185	cg06123753	13.7868	0.5	0.019
chr2:63866302-63866302	cg22907589	10.5453	0.49	0.0207
chr2:66924409-66924409	cg25302172	13.3845	0.43	0.0455
chr2:71662023-71662023	cg19102272	16.1158	0.42	0.0495	ZNF638;ZNF638	NM_014497;NM_001014972	3'UTR;3'UTR
chr2:74978584-74978584	cg00684101	12.2694	0.44	0.0409
chr2:75300249-75300249	cg25797006	11.6466	0.43	0.0433	TACR1;TACR1	NM_001058;NM_015727	Body;Body
chr2:79269568-79269568	cg15574240	12.3557	0.43	0.0436
chr2:795935-795935	cg21032567	10.1638	0.55	0.0086
chr2:96257861-96257861	cg27297176	10.3795	0.55	0.0083	TRIM43;TRIM43	NM_138800;NM_138800	5'UTR;1stExon
chr2:98961824-98961824	cg16184827	12.3085	0.51	0.0145	CNGA3;CNGA3	NM_001079878;NM_001298	TSS1500;TSS1500
chr20:11899258-11899258	cg20981848	18.0107	0.5	0.018	BTBD3;BTBD3	NM_014962;NM_181443	Body;Body
chr20:21001266-21001266	cg04792330	11.6726	0.52	0.0141
chr20:23015906-23015906	cg17586860	10.199	0.47	0.0265	SSTR4	NM_001052	TSS200
chr20:39942766-39942766	cg03819338	10.6845	0.51	0.0147
chr20:50418554-50418554	cg00169792	16.2501	0.52	0.0131	SALL4	NM_020436	Body
chr20:55199914-55199914	cg23662142	12.3464	0.56	0.0063
chr20:61668419-61668419	cg24143873	14.1151	0.49	0.0194	NCRNA00029	NR_028295	TSS200
chr20:62705807-62705807	cg14128040	24.7611	0.49	0.0212	RGS19;RGS19	NM_001039467;NM_005873	Body;Body
chr21:15096426-15096426	cg22940953	11.4771	0.43	0.0433
chr21:15096626-15096626	cg05949379	11.3601	0.52	0.0128
chr21:22370237-22370237	cg13297960	10.0856	0.55	0.0082	NCAM2	NM_004540	TSS1500
chr21:31691461-31691461	cg18406531	13.9573	0.59	0.0038	KRTAP26-1;KRTAP26-1	NM_203405;NM_203405	3'UTR;1stExon
chr21:40012948-40012948	cg17759616	14.6743	0.59	0.004	ERG;ERG	NM_001136154;NM_004449	5'UTR;5'UTR
chr22:17637143-17637143	cg01409421	14.1982	0.51	0.0159	CECR5;CECR5	NM_017829;NM_033070	Body;Body
chr22:22225580-22225580	cg08397205	13.3551	0.46	0.0312
chr22:28191914-28191914	cg22976732	27.5403	0.47	0.0272	MN1	NM_002430	Body
chr22:31501382-31501382	cg06942979	10.5852	0.44	0.0418	SELM	NM_080430	Body
chr22:42095536-42095536	cg11260046	12.056	0.51	0.0161	MEI1;MEI1	NM_152513;NM_152513	1stExon;5'UTR
chr22:49698612-49698612	cg11187452	10.5775	0.49	0.0219
chr3:10149803-10149803	cg20850873	14.1864	0.51	0.0147	C3orf24;C3orf24;C3orf24;C3orf24	NM_001164839;NM_173472;NM_173472;NM_001164839	1stExon;1stExon;5'UTR;5'UTR
chr3:10149882-10149882	cg13047869	13.9252	0.55	0.0078	C3orf24;C3orf24;C3orf24;C3orf24	NM_001164839;NM_173472;NM_173472;NM_001164839	1stExon;1stExon;5'UTR;5'UTR
chr3:10149963-10149963	cg10729496	12.3353	0.43	0.0471	C3orf24;C3orf24	NM_001164839;NM_173472	TSS200;TSS200
chr3:10150065-10150065	cg18621852	16.8573	0.56	0.0065	C3orf24;C3orf24	NM_001164839;NM_173472	TSS200;TSS200
chr3:10150083-10150083	cg15117754	21.5671	0.57	0.006	C3orf24;C3orf24	NM_001164839;NM_173472	TSS200;TSS200
chr3:107097413-107097413	cg15507901	18.8963	0.58	0.0043	CCDC54	NM_032600	1stExon
chr3:111629875-111629875	cg21328779	14.0655	0.5	0.0169	PHLDB2;PHLDB2;PHLDB2;PHLDB2	NM_001134438;NM_001134439;NM_145753;NM_001134437	Body;Body;Body;Body
chr3:112053517-112053517	cg07681748	25.637	0.51	0.0162	CD200;CD200	NM_001004196;NM_005944	Body;Body
chr3:112486072-112486072	cg17086773	10.6586	0.47	0.0274
chr3:113160637-113160637	cg18194305	10.6604	0.47	0.0267	WDR52;WDR52	NM_018338;NM_001164496	TSS1500;TSS1500
chr3:122296505-122296505	cg18016254	10.4281	0.69	0.0004	PARP15;PARP15	NM_001113523;NM_001113523	5'UTR;1stExon
chr3:124860686-124860686	cg26107890	19.1036	0.67	0.0007	SLC12A8	NM_024628	Body
chr3:125120406-125120406	cg13321688	11.125	0.43	0.0471
chr3:127636435-127636435	cg01022611	16.0094	0.46	0.0312
chr3:130235479-130235479	cg01980311	25.4526	0.53	0.0114
chr3:133393454-133393454	cg27014380	17.0686	0.43	0.044
chr3:137491164-137491164	cg08160826	15.5557	0.44	0.0424
chr3:141012746-141012746	cg18685879	14.8583	0.54	0.0088	ACPL2;ACPL2	NM_001037172;NM_152282	3'UTR;3'UTR
chr3:141453514-141453514	cg21890222	12.2564	0.49	0.021
chr3:151055545-151055545	cg26182497	11.0077	0.47	0.0276	P2RY12;P2RY12;MED12L	NM_176876;NM_022788;NM_053002	3'UTR;3'UTR;Body
chr3:15251896-15251896	cg14963812	17.1993	0.7	0.0003	CAPN7	NM_014296	Body
chr3:157537400-157537400	cg07184807	21.1945	0.6	0.003
chr3:158991021-158991021	cg24988345	10.5073	0.42	0.0498	SCHIP1	NM_014575	TSS1500
chr3:16369004-16369004	cg10295937	11.2079	0.47	0.0263	RFTN1	NM_015150	Body
chr3:168945731-168945731	cg08511485	11.3671	0.43	0.0471	MECOM	NM_004991	Body
chr3:173632551-173632551	cg14890220	12.736	0.57	0.0055	NLGN1	NM_014932	Body
chr3:177391387-177391387	cg01178099	11.1989	0.47	0.0269
chr3:184301239-184301239	cg17342973	18.4529	0.43	0.0484
chr3:187467427-187467427	cg23664385	13.1243	0.53	0.0118
chr3:188665413-188665413	cg13548220	11.732	0.5	0.0186
chr3:194646995-194646995	cg18762125	11.9613	0.46	0.0329
chr3:194822510-194822510	cg08994763	11.4302	0.46	0.0314	C3orf21	NM_152531	Body
chr3:195812701-195812701	cg22207141	17.5353	0.45	0.0373
chr3:196255998-196255998	cg05542785	12.3877	0.52	0.0137
chr3:27498659-27498659	cg06798189	12.4613	0.5	0.0178	SLC4A7	NM_003615	TSS1500
chr3:27761408-27761408	cg06748434	23.9643	0.49	0.0205	EOMES	NM_005442	Body
chr3:35726493-35726493	cg21852346	10.8777	0.48	0.0249	ARPP-21;ARPP-21;ARPP-21;ARPP-21	NM_001025069;NM_198399;NM_001025068;NM_016300	3'UTR;3'UTR;3'UTR;Body
chr3:36805814-36805814	cg24144083	12.144	0.62	0.0023
chr3:40429014-40429014	cg17264618	13.3102	0.6	0.0032	ENTPD3	NM_001248	5'UTR
chr3:42306737-42306737	cg17621718	16.9589	0.45	0.0362	CCK	NM_000729	TSS1500
chr3:42306974-42306974	cg11142705	18.5547	0.6	0.003	CCK	NM_000729	TSS1500
chr3:43750490-43750490	cg17528003	13.3192	0.45	0.0344	ABHD5	NM_016006	Body
chr3:44037760-44037760	cg14858267	13.7345	0.56	0.0072
chr3:54122032-54122032	cg01296889	12.647	0.44	0.0384
chr3:54226648-54226648	cg23487721	17.4194	0.54	0.01	CACNA2D3	NM_018398	Body
chr3:56797995-56797995	cg00883019	11.159	0.54	0.0102	ARHGEF3;ARHGEF3;ARHGEF3	NM_001128616;NM_001128615;NM_019555	Body;Body;Body
chr3:58572520-58572520	cg11603443	11.0731	0.48	0.0247
chr3:59996265-59996265	cg16806041	11.3487	0.46	0.0319	FHIT;FHIT	NM_001166243;NM_002012	Body;Body
chr3:62301156-62301156	cg00734967	17.7434	0.49	0.0216
chr3:66008776-66008776	cg00125744	10.0167	0.6	0.003	MAGI1;MAGI1;MAGI1	NM_015520;NM_001033057;NM_004742	Body;Body;Body
chr3:69942668-69942668	cg06789445	13.0035	0.6	0.0031	MITF;MITF;MITF;MITF	NM_198177;NM_198159;NM_006722;NM_198178	Body;Body;Body;Body
chr3:75705108-75705108	cg04572206	11.2611	0.52	0.0132
chr3:75712404-75712404	cg08839697	12.7731	0.43	0.0462	FRG2C	NM_001124759	TSS1500
chr4:100432162-100432162	cg26647453	15.1456	0.43	0.0433	C4orf17;C4orf17	NM_032149;NM_032149	5'UTR;1stExon
chr4:11428985-11428985	cg01089498	11.6547	0.57	0.0055	HS3ST1	NM_005114	5'UTR
chr4:122873487-122873487	cg03215181	10.9242	0.54	0.0093	TRPC3	NM_001130698	TSS1500
chr4:13530923-13530923	cg17922359	10.089	0.65	0.001
chr4:13543119-13543119	cg18817990	21.4692	0.53	0.0105	NKX3-2	NM_001189	3'UTR
chr4:142790226-142790226	cg02222761	15.6882	0.44	0.0384
chr4:146815316-146815316	cg24785316	11.4784	0.81	0	ZNF827	NM_178835	Body
chr4:153862708-153862708	cg18902697	12.0162	0.43	0.0471	FHDC1	NM_033393	TSS1500
chr4:174430614-174430614	cg16509851	11.194	0.57	0.006
chr4:183128657-183128657	cg06149333	10.0296	0.75	0
chr4:185936575-185936575	cg09019546	13.7654	0.5	0.019
chr4:187998952-187998952	cg09690449	22.9155	0.46	0.0303
chr4:188009477-188009477	cg18421710	16.179	0.43	0.0433
chr4:188918072-188918072	cg26398286	11.8646	0.46	0.0298	ZFP42	NM_174900	5'UTR
chr4:26832099-26832099	cg04873627	18.9267	0.43	0.0478
chr4:299022-299022	cg13208922	14.872	0.58	0.0044
chr4:3704880-3704880	cg15642673	10.304	0.47	0.0291
chr4:40246022-40246022	cg21441590	18.5953	0.5	0.019	RHOH	NM_004310	3'UTR
chr4:41750864-41750864	cg01416712	13.7229	0.44	0.0421	PHOX2B;PHOX2B	NM_003924;NM_003924	1stExon;5'UTR
chr4:46126373-46126373	cg23691961	12.1559	0.59	0.0038	GABRG1	NM_173536	TSS1500
chr4:48390346-48390346	cg05872234	14.8052	0.51	0.0155	SLAIN2	NM_020846	Body
chr4:52943099-52943099	cg08718490	18.1461	0.54	0.0099	SPATA18	NM_145263	Body
chr4:54357010-54357010	cg24076747	11.1471	0.46	0.0307	LNX1;LNX1	NM_032622;NM_001126328	Body;Body
chr4:55945399-55945399	cg10858353	12.9176	0.58	0.0045	KDR	NM_002253	3'UTR
chr4:56659985-56659985	cg24495585	11.9194	0.56	0.0069
chr4:56660398-56660398	cg19676181	12.3267	0.55	0.0084
chr4:56685972-56685972	cg16606320	11.2143	0.44	0.0387	LOC644145	NR_003935	TSS1500
chr4:69514031-69514031	cg09189601	15.8076	0.52	0.0129	UGT2B15	NM_001076	Body
chr4:7129517-7129517	cg16307866	10.8697	0.43	0.0468
chr4:7252415-7252415	cg21522159	14.1575	0.56	0.007	SORCS2	NM_020777	Body
chr4:72903914-72903914	cg14010852	19.4149	0.53	0.0107	NPFFR2;NPFFR2;NPFFR2	NM_004885;NM_053036;NM_001144756	Body;TSS1500;TSS1500
chr4:75854895-75854895	cg04398972	21.8156	0.46	0.0317
chr4:76865528-76865528	cg19666555	10.2224	0.45	0.0375
chr4:78532698-78532698	cg06662476	13.7311	0.5	0.019	CXCL13	NM_006419	3'UTR
chr4:79258587-79258587	cg20948271	12.466	0.42	0.0491	FRAS1;FRAS1	NM_025074;NM_001166133	Body;Body
chr4:81128234-81128234	cg22270027	11.5795	0.46	0.0296
chr4:81128845-81128845	cg03441770	15.599	0.55	0.0082
chr5:10336373-10336373	cg08749095	18.2017	0.53	0.0107
chr5:1076627-1076627	cg02333352	12.0559	0.46	0.0305	SLC12A7	NM_006598	Body
chr5:111056920-111056920	cg10599998	13.0294	0.55	0.0078
chr5:112608004-112608004	cg04138046	10.289	0.65	0.0011	MCC;MCC	NM_002387;NM_001085377	Body;Body
chr5:112796302-112796302	cg22165626	16.3913	0.63	0.0018	MCC	NM_001085377	Body
chr5:114761245-114761245	cg04282307	26.7188	0.44	0.0381
chr5:116150282-116150282	cg25236512	10.5738	0.6	0.0029
chr5:122066732-122066732	cg18098053	10.6839	0.45	0.037
chr5:122620929-122620929	cg17807172	11.7415	0.6	0.0032
chr5:123973317-123973317	cg15705930	10.3155	0.46	0.0329	ZNF608	NM_020747	3'UTR
chr5:126408756-126408756	cg14340928	17.6428	0.44	0.0418	FLJ44606;FLJ44606	NM_001164478;NM_001164479	5'UTR;5'UTR
chr5:134825791-134825791	cg01889143	12.2182	0.64	0.0013
chr5:134825895-134825895	cg24792289	10.866	0.64	0.0012
chr5:134827218-134827218	cg05191175	10.5443	0.61	0.0026
chr5:135701094-135701094	cg06448705	10.3733	0.52	0.014	TRPC7;TRPC7;TRPC7;TRPC7;TRPC7;TRPC7	NM_001167576;NM_001167577;NM_020389;NM_001167576;NM_020389;NM_001167577	5'UTR;1stExon;1stExon;1stExon;5'UTR;5'UTR
chr5:140165998-140165998	cg09032973	11.2483	0.43	0.0449	PCDHA1;PCDHA1;PCDHA1	NM_031410;NM_031411;NM_018900	1stExon;1stExon;1stExon
chr5:140166589-140166589	cg15116095	15.0014	0.48	0.0237	PCDHA1;PCDHA1;PCDHA1	NM_031410;NM_031411;NM_018900	1stExon;1stExon;1stExon
chr5:140185635-140185635	cg23419885	12.9347	0.42	0.0491	PCDHA2;PCDHA1;PCDHA4;PCDHA4;PCDHA1;PCDHA3	NM_018905;NM_031411;NM_031500;NM_018907;NM_018900;NM_018906	Body;Body;TSS1500;TSS1500;Body;Body
chr5:140207498-140207498	cg13022679	29.5761	0.62	0.0022	PCDHA2;PCDHA1;PCDHA1;PCDHA6;PCDHA5;PCDHA6;PCDHA3;PCDHA4;PCDHA6	NM_018905;NM_031411;NM_018900;NM_031848;NM_018908;NM_018909;NM_018906;NM_018907;NM_031849	Body;Body;Body;TSS200;Body;TSS200;Body;Body;TSS200
chr5:140235586-140235586	cg10519368	13.8313	0.51	0.0142	PCDHA6;PCDHA2;PCDHA1;PCDHA9;PCDHA7;PCDHA1;PCDHA6;PCDHA10;PCDHA5;PCDHA3;PCDHA4;PCDHA10;PCDHA10;PCDHA8	NM_031849;NM_018905;NM_031411;NM_031857;NM_018910;NM_018900;NM_018909;NM_031860;NM_018908;NM_018906;NM_018907;NM_031859;NM_018901;NM_018911	Body;Body;Body;Body;Body;Body;Body;TSS200;Body;Body;Body;TSS200;TSS200;Body
chr5:140254909-140254909	cg14557699	15.3898	0.47	0.0274	PCDHA12;PCDHA7;PCDHA6;PCDHA10;PCDHA4;PCDHA11;PCDHA8;PCDHA1;PCDHA2;PCDHA6;PCDHA1;PCDHA9;PCDHA5;PCDHA3;PCDHA12;PCDHA10	NM_018903;NM_018910;NM_018909;NM_018901;NM_018907;NM_018902;NM_018911;NM_031411;NM_018905;NM_031849;NM_018900;NM_031857;NM_018908;NM_018906;NM_031864;NM_031860	TSS200;Body;Body;Body;Body;Body;Body;Body;Body;Body;Body;Body;Body;Body;TSS200;Body
chr5:14038630-14038630	cg10979364	16.6913	0.55	0.0086
chr5:140475049-140475049	cg15389068	17.8656	0.44	0.043	PCDHB2	NM_018936	1stExon
chr5:140501380-140501380	cg13288164	15.2955	0.49	0.0214	PCDHB4	NM_018938	TSS200
chr5:140506895-140506895	cg23484515	15.2732	0.58	0.0048
chr5:140562236-140562236	cg26389950	12.0849	0.55	0.0076	PCDHB16	NM_020957	1stExon
chr5:140624874-140624874	cg17023770	10.2146	0.52	0.0125	PCDHB15	NM_018935	TSS1500
chr5:140723509-140723509	cg14468658	19.5434	0.44	0.0415	PCDHGA2;PCDHGA3;PCDHGA1;PCDHGA3	NM_018915;NM_018916;NM_018912;NM_032011	Body;TSS200;Body;TSS200
chr5:140744076-140744076	cg01911239	10.2177	0.5	0.0169	PCDHGA4;PCDHGA2;PCDHGA5;PCDHGB2;PCDHGA1;PCDHGB1;PCDHGA3;PCDHGA5	NM_018917;NM_018915;NM_032054;NM_018923;NM_018912;NM_018922;NM_018916;NM_018918	Body;Body;1stExon;Body;Body;Body;Body;1stExon
chr5:140753655-140753655	cg04637478	14.1011	0.56	0.0073	PCDHGA4;PCDHGA1;PCDHGA6;PCDHGA5;PCDHGB1;PCDHGA3;PCDHGA6;PCDHGA2;PCDHGB2;PCDHGB3	NM_018917;NM_018912;NM_018919;NM_018918;NM_018922;NM_018916;NM_032086;NM_018915;NM_018923;NM_018924	Body;Body;1stExon;Body;Body;Body;1stExon;Body;Body;Body
chr5:140777503-140777503	cg08491188	11.2344	0.48	0.0245	PCDHGA4;PCDHGA6;PCDHGA1;PCDHGA8;PCDHGB5;PCDHGA5;PCDHGB1;PCDHGB4;PCDHGA3;PCDHGA2;PCDHGB5;PCDHGA7;PCDHGB2;PCDHGB3	NM_018917;NM_018919;NM_018912;NM_032088;NM_018925;NM_018918;NM_018922;NM_003736;NM_018916;NM_018915;NM_032099;NM_018920;NM_018923;NM_018924	Body;Body;Body;Body;TSS200;Body;Body;Body;Body;Body;TSS200;Body;Body;Body
chr5:140787430-140787430	cg07613945	13.3915	0.46	0.0305	PCDHGA4;PCDHGA6;PCDHGA9;PCDHGA1;PCDHGA8;PCDHGA5;PCDHGB1;PCDHGB6;PCDHGB4;PCDHGA3;PCDHGA2;PCDHGA7;PCDHGB2;PCDHGB6;PCDHGB5;PCDHGB3	NM_018917;NM_018919;NM_018921;NM_018912;NM_032088;NM_018918;NM_018922;NM_018926;NM_003736;NM_018916;NM_018915;NM_018920;NM_018923;NM_032100;NM_018925;NM_018924	Body;Body;Body;Body;Body;Body;Body;TSS1500;Body;Body;Body;Body;Body;TSS1500;Body;Body
chr5:140892677-140892677	cg00076195	11.6857	0.46	0.0329
chr5:140892822-140892822	cg08860070	21.6621	0.57	0.0056
chr5:142431272-142431272	cg27579771	27.6022	0.43	0.0478	ARHGAP26;ARHGAP26	NM_015071;NM_001135608	Body;Body
chr5:142458116-142458116	cg11867084	17.8509	0.47	0.0285	ARHGAP26;ARHGAP26	NM_015071;NM_001135608	Body;Body
chr5:14508132-14508132	cg23329275	10.2896	0.67	0.0006	TRIO	NM_007118	Body
chr5:146910671-146910671	cg20436206	10.5444	0.51	0.0152
chr5:150326174-150326174	cg05016408	13.0638	0.56	0.0065	LOC134466	NR_026867	TSS200
chr5:153852929-153852929	cg03923071	10.766	0.57	0.006
chr5:153852934-153852934	cg04223553	12.5837	0.59	0.0041
chr5:153853545-153853545	cg10981651	18.1942	0.44	0.0384
chr5:162996851-162996851	cg12608053	10.3653	0.44	0.0418
chr5:167988974-167988974	cg25938287	10.9418	0.54	0.0089	MIR103-1;PANK3	NR_029520;NM_024594	TSS1500;Body
chr5:170877840-170877840	cg07100000	13.0866	0.61	0.0025	FGF18	NM_003862	Body
chr5:171095097-171095097	cg21490444	11.7479	0.51	0.0147
chr5:174115696-174115696	cg05469346	19.3806	0.46	0.0321
chr5:174115735-174115735	cg05672912	22.3998	0.47	0.0287
chr5:175108269-175108269	cg01296705	10.8181	0.49	0.0205	HRH2;HRH2	NM_001131055;NM_022304	5'UTR;TSS200
chr5:177196865-177196865	cg06965744	12.775	0.53	0.0103	FAM153A	NM_173663	5'UTR
chr5:177209285-177209285	cg26673648	41.0319	0.52	0.0134
chr5:177391178-177391178	cg13971262	15.3441	0.6	0.0031
chr5:178000774-178000774	cg04510049	23.4231	0.64	0.0013	COL23A1	NM_173465	Body
chr5:179517140-179517140	cg17627629	22.9415	0.5	0.0169
chr5:180046528-180046528	cg24536824	17.7525	0.48	0.0249	FLT4;FLT4	NM_002020;NM_182925	Body;Body
chr5:1809371-1809371	cg12153106	11.3117	0.56	0.0062	NDUFS6	NM_004553	Body
chr5:1851071-1851071	cg26840437	12.8865	0.44	0.0427
chr5:31096669-31096669	cg13650062	11.5192	0.45	0.0352
chr5:31414530-31414530	cg18303847	14.3345	0.51	0.0165	RNASEN;RNASEN	NM_013235;NM_001100412	Body;Body
chr5:33958213-33958213	cg03212131	13.087	0.5	0.0183	SLC45A2;SLC45A2	NM_016180;NM_001012509	Body;Body
chr5:34621927-34621927	cg17723710	25.5867	0.48	0.0234
chr5:34710183-34710183	cg18027207	14.4027	0.48	0.0236	RAI14;RAI14;RAI14;RAI14;RAI14;RAI14	NM_001145525;NM_001145520;NM_001145521;NM_015577;NM_001145523;NM_001145522	Body;Body;Body;Body;Body;Body
chr5:37836246-37836246	cg04209913	27.0116	0.45	0.037	GDNF;GDNF;GDNF	NM_199234;NM_000514;NM_199231	TSS1500;5'UTR;TSS1500
chr5:37848810-37848810	cg04208863	28.5419	0.44	0.0384
chr5:38846540-38846540	cg03138091	13.2669	0.56	0.0072	OSMR;OSMR	NM_001168355;NM_003999	5'UTR;5'UTR
chr5:40905255-40905255	cg19684783	11.4164	0.5	0.0178
chr5:42757171-42757171	cg21929564	12.2347	0.42	0.0488	CCDC152	NM_001134848	5'UTR
chr5:43007320-43007320	cg09164108	24.3005	0.46	0.0326
chr5:4557632-4557632	cg03719793	14.7723	0.6	0.0031
chr5:60899133-60899133	cg09798077	13.1929	0.47	0.0257
chr5:61844855-61844855	cg13676759	24.4982	0.48	0.0234	IPO11;IPO11	NM_016338;NM_001134779	Body;Body
chr5:68431589-68431589	cg26556492	25.5612	0.51	0.0147
chr5:74808039-74808039	cg00165981	12.9369	0.43	0.0455	COL4A3BP;COL4A3BP;COL4A3BP;POLK	NM_031361;NM_001130105;NM_005713;NM_016218	TSS1500;TSS1500;TSS1500;5'UTR
chr5:79535328-79535328	cg14868212	30.6435	0.43	0.0471	SERINC5	NM_178276	Body
chr5:87441873-87441873	cg09502015	13.7222	0.43	0.0478
chr5:87968528-87968528	cg14636534	12.1802	0.46	0.0305	LOC645323;LOC645323;LOC645323	NR_024383;NR_015436;NR_024384	Body;Body;Body
chr5:88122944-88122944	cg24124703	19.9632	0.46	0.0298	MEF2C;MEF2C	NM_001131005;NM_002397	5'UTR;5'UTR
chr5:92832939-92832939	cg18766383	13.3861	0.51	0.0149	FLJ42709;FLJ42709	NR_021491;NR_015369	Body;Body
chr5:92911154-92911154	cg16456423	19.1355	0.46	0.0296	FLJ42709;FLJ42709	NR_021490;NR_021491	Body;Body
chr6:100442120-100442120	cg26466587	10.0042	0.5	0.0175	MCHR2;MCHR2	NM_001040179;NM_032503	TSS200;TSS200
chr6:106441441-106441441	cg03942932	23.924	0.55	0.0084
chr6:106441618-106441618	cg03830061	17.412	0.43	0.0468
chr6:11161658-11161658	cg01111006	11.8139	0.49	0.0221
chr6:112154581-112154581	cg12636607	11.0376	0.61	0.0027	FYN	NM_002037	5'UTR
chr6:112652308-112652308	cg06529600	11.5939	0.5	0.0183
chr6:13492509-13492509	cg08268114	12.9073	0.56	0.0073
chr6:13876469-13876469	cg27582696	10.673	0.56	0.0067
chr6:1387836-1387836	cg13728003	10.3949	0.49	0.0202
chr6:152958864-152958864	cg16251777	13.0748	0.43	0.0433	SYNE1;SYNE1	NM_033071;NM_182961	TSS1500;TSS1500
chr6:154330965-154330965	cg12944573	13.9182	0.43	0.0449	OPRM1;OPRM1;OPRM1	NM_001145281;NM_001145279;NM_001145280	TSS1500;TSS1500;TSS1500
chr6:155169200-155169200	cg03680753	10.9748	0.55	0.0086
chr6:157285705-157285705	cg26286239	15.3775	0.65	0.001	ARID1B;ARID1B;ARID1B	NM_017519;NM_175863;NM_020732	Body;Body;Body
chr6:158966350-158966350	cg21742001	15.8513	0.47	0.0285	TMEM181	NM_020823	Body
chr6:164241413-164241413	cg00180684	10.562	0.47	0.0287
chr6:167508170-167508170	cg10661263	13.4953	0.55	0.0074
chr6:167703591-167703591	cg11947528	11.878	0.44	0.0415	UNC93A;UNC93A	NM_001143947;NM_018974	TSS1500;TSS1500
chr6:169653612-169653612	cg17608103	12.6091	0.43	0.0465	THBS2	NM_003247	5'UTR
chr6:26017280-26017280	cg07816556	16.7275	0.56	0.0063	HIST1H1A;HIST1H1A	NM_005325;NM_005325	3'UTR;1stExon
chr6:26204643-26204643	cg10091738	16.7121	0.52	0.0137	HIST1H4E	NM_003545	TSS1500
chr6:27569167-27569167	cg03315940	11.5169	0.49	0.02
chr6:28458328-28458328	cg04314624	11.9465	0.43	0.0443
chr6:28505429-28505429	cg04650654	12.9224	0.52	0.0129
chr6:28584057-28584057	cg09470274	12.4882	0.48	0.0249
chr6:28584061-28584061	cg20450471	10.5415	0.43	0.0449
chr6:28584103-28584103	cg03682719	10.7544	0.45	0.0341
chr6:28584138-28584138	cg22121557	11.4641	0.45	0.0375
chr6:28584155-28584155	cg03858673	16.0697	0.42	0.0495
chr6:28754086-28754086	cg01348424	10.4574	0.44	0.0407
chr6:28827033-28827033	cg23986376	14.7887	0.54	0.0091
chr6:28912126-28912126	cg03720390	14.0708	0.48	0.0232
chr6:28956247-28956247	cg05404698	10.1415	0.51	0.0142
chr6:29521604-29521604	cg12217400	11.3636	0.47	0.0278
chr6:29629986-29629986	cg08725892	25.6	0.46	0.0312	MOG;MOG;MOG;MOG;MOG;MOG;MOG;MOG;MOG;MOG;MOG	NM_206813;NM_001170418;NM_206811;NM_206810;NM_206809;NM_001170417;NM_001008229;NM_001008228;NM_206812;NM_002433;NM_206814	Body;Body;Body;Body;Body;Body;Body;Body;Body;Body;Body
chr6:29723407-29723407	cg08926713	16.7916	0.49	0.0205
chr6:30071412-30071412	cg22377040	14.7358	0.44	0.0387	TRIM31	NM_007028	Body
chr6:30720261-30720261	cg19913563	21.8465	0.43	0.0452
chr6:31275643-31275643	cg25107000	20.524	0.61	0.0024
chr6:32116853-32116853	cg27067781	13.6949	0.6	0.0029	PRRT1	NM_030651	3'UTR
chr6:32141257-32141257	cg13071068	11.7297	0.6	0.003	AGPAT1;AGPAT1	NM_006411;NM_032741	5'UTR;5'UTR
chr6:32146232-32146232	cg11995506	15.4678	-0.47	0.0291	RNF5;AGPAT1;RNF5P1;RNF5	NM_006913;NM_032741;NR_003129;NM_006913	1stExon;TSS1500;Body;5'UTR
chr6:32847527-32847527	cg07189222	22.5002	0.54	0.0094	PPP1R2P1	NR_027771	Body
chr6:34098387-34098387	cg24082276	15.5906	0.57	0.0058	GRM4	NM_000841	Body
chr6:41411455-41411455	cg11894474	12.0375	0.48	0.0249
chr6:41801624-41801624	cg16648265	13.5884	0.45	0.0352	USP49	NM_018561	5'UTR
chr6:4772890-4772890	cg14913512	30.1503	0.57	0.0056	CDYL	NR_026590	Body
chr6:48669741-48669741	cg18874111	10.6231	0.53	0.0114
chr6:53772058-53772058	cg04166405	12.9079	0.47	0.028	LRRC1	NM_018214	Body
chr6:5554079-5554079	cg10012448	10.5264	0.45	0.0336	FARS2	NM_006567	Body
chr6:55740182-55740182	cg06865255	10.5908	0.43	0.0471	BMP5;BMP5	NM_021073;NM_021073	1stExon;5'UTR
chr6:72130553-72130553	cg22300282	10.5003	0.47	0.0291	C6orf155	NR_026807	TSS200
chr6:74072242-74072242	cg20048521	11.12	0.42	0.0488	C6orf221	NM_001017361	TSS200
chr6:74072255-74072255	cg19146112	13.0715	0.53	0.0114	C6orf221	NM_001017361	TSS200
chr6:74072320-74072320	cg13001017	10.5889	0.51	0.0143	C6orf221	NM_001017361	TSS200
chr6:81797194-81797194	cg00004061	14.2384	0.51	0.0157
chr6:9503813-9503813	cg20128323	19.8497	0.5	0.0168
chr6:99049704-99049704	cg13162690	13.2753	0.43	0.0455
chr7:100803941-100803941	cg13324919	11.7232	0.5	0.0175	AP1S1	NM_001283	3'UTR
chr7:104865796-104865796	cg25883405	15.5149	0.53	0.0103	SRPK2;SRPK2	NM_182691;NM_182692	Body;Body
chr7:106040839-106040839	cg21114407	19.3298	0.46	0.03
chr7:110496797-110496797	cg11879096	10.7122	0.48	0.0234	IMMP2L	NM_032549	Body
chr7:111368651-111368651	cg01567825	10.5366	0.44	0.043	DOCK4	NM_014705	Body
chr7:11232035-11232035	cg02133456	16.1627	0.44	0.0404
chr7:126698451-126698451	cg17540499	19.0541	0.45	0.0357	MIR592;GRM8;GRM8;GRM8	NR_030323;NM_001127323;NR_028041;NM_000845	TSS1500;Body;Body;Body
chr7:127449997-127449997	cg14634918	12.5626	0.55	0.0087	SND1	NM_014390	Body
chr7:1336696-1336696	cg12921647	12.5955	0.47	0.0259
chr7:138490557-138490557	cg02127127	14.0891	0.6	0.0034	TMEM213	NM_001085429	3'UTR
chr7:149389669-149389669	cg04487296	13.7561	0.63	0.0016
chr7:150105086-150105086	cg00852675	10.9587	0.47	0.0261	LOC728743	NR_027237	Body
chr7:154473289-154473289	cg23463533	10.3146	0.65	0.001	DPP6;DPP6;DPP6	NM_001936;NM_130797;NM_001039350	Body;Body;Body
chr7:157553346-157553346	cg19744528	10.5928	0.51	0.015	PTPRN2;PTPRN2;PTPRN2	NM_002847;NM_130842;NM_130843	Body;Body;Body
chr7:157710472-157710472	cg12415687	11.1945	0.53	0.0107	PTPRN2;PTPRN2;PTPRN2	NM_002847;NM_130842;NM_130843	Body;Body;Body
chr7:158110405-158110405	cg23759393	24.8964	0.51	0.0155	PTPRN2;PTPRN2;PTPRN2	NM_002847;NM_130842;NM_130843	Body;Body;Body
chr7:158269297-158269297	cg27099497	11.8698	0.5	0.0168	PTPRN2;PTPRN2;PTPRN2	NM_002847;NM_130842;NM_130843	Body;Body;Body
chr7:158703416-158703416	cg02084948	13.3496	0.53	0.011	WDR60	NM_018051	Body
chr7:16505592-16505592	cg07220448	13.2357	0.46	0.0321	SOSTDC1	NM_015464	TSS200
chr7:1861623-1861623	cg06986330	13.5754	0.57	0.0061	MAD1L1;MAD1L1;MAD1L1	NM_003550;NM_001013837;NM_001013836	Body;Body;Body
chr7:20256996-20256996	cg15749858	13.3138	0.48	0.0247	MACC1;MACC1	NM_182762;NM_182762	1stExon;5'UTR
chr7:27291346-27291346	cg09765089	18.3239	0.45	0.0373
chr7:28101336-28101336	cg21771915	12.9209	0.44	0.0398	JAZF1	NM_175061	Body
chr7:30740619-30740619	cg21110092	15.3226	0.66	0.0009
chr7:31230577-31230577	cg21984020	20.1563	0.49	0.0199
chr7:34360960-34360960	cg20659752	11.3057	0.48	0.0247
chr7:43797898-43797898	cg19725553	16.6719	0.5	0.0187	BLVRA	NM_000712	TSS1500
chr7:44152238-44152238	cg06475514	12.0913	0.54	0.0094	AEBP1	NM_001129	Body
chr7:47539536-47539536	cg14998086	37.4444	0.48	0.0232	TNS3	NM_022748	5'UTR
chr7:48491590-48491590	cg27386033	10.859	0.46	0.031	ABCA13	NM_152701	Body
chr7:50628841-50628841	cg20336341	12.4033	0.44	0.0424	DDC;DDC	NM_000790;NM_001082971	TSS200;5'UTR
chr7:54612333-54612333	cg21179088	10.69	0.51	0.0149	VSTM2A	NM_182546	Body
chr7:56355681-56355681	cg20260127	10.8942	0.62	0.0019
chr7:57471759-57471759	cg15134787	15.8701	0.48	0.0249
chr7:62528691-62528691	cg05810536	11.1452	0.59	0.0036
chr7:62528852-62528852	cg00833479	10.4377	0.45	0.0352
chr7:63250817-63250817	cg11385338	26.1592	0.58	0.0046
chr7:63361088-63361088	cg01010988	11.6121	0.53	0.0105
chr7:63361127-63361127	cg03124146	12.551	0.51	0.0151
chr7:63497644-63497644	cg24729221	11.5562	0.61	0.0023
chr7:63498133-63498133	cg11586570	14.4885	0.49	0.0203
chr7:63505584-63505584	cg15473066	11.4526	0.44	0.0395	ZNF727	NM_001159522	TSS1500
chr7:63505791-63505791	cg24975986	12.3872	0.66	0.0007	ZNF727	NM_001159522	TSS200
chr7:63642083-63642083	cg20164601	12.8181	0.52	0.0138
chr7:63643958-63643958	cg24711774	12.6549	0.48	0.0232
chr7:69283201-69283201	cg15052518	10.4399	0.55	0.0077	AUTS2;AUTS2;AUTS2	NM_015570;NM_001127232;NM_001127231	Body;Body;Body
chr7:70543800-70543800	cg07307422	12.4513	0.46	0.031
chr7:71747028-71747028	cg24500222	11.1663	0.43	0.0446	CALN1;CALN1	NM_001017440;NM_031468	5'UTR;Body
chr7:81244608-81244608	cg03114899	11.2282	0.5	0.018
chr7:90755643-90755643	cg00101436	13.2192	0.61	0.0025	CDK14	NM_012395	3'UTR
chr7:91792839-91792839	cg04644523	10.5455	0.44	0.0384	LOC401387	NM_001161528	1stExon
chr7:92672812-92672812	cg19228034	12.2486	0.45	0.0334
chr8:10449096-10449096	cg14628260	12.9079	0.44	0.0401
chr8:108441547-108441547	cg24810735	12.8216	0.47	0.028	ANGPT1	NM_001146	Body
chr8:109096151-109096151	cg00997551	14.8657	0.52	0.013	RSPO2	NM_178565	TSS1500
chr8:116276590-116276590	cg15312498	10.568	0.49	0.0219
chr8:124219725-124219725	cg20296493	12.4201	0.47	0.0267	FAM83A;FAM83A	NM_032899;NM_207006	Body;Body
chr8:125953232-125953232	cg02315696	21.8077	0.46	0.0298	LOC157381	NR_027321	TSS1500
chr8:127748477-127748477	cg09184315	17.3464	0.45	0.0373
chr8:12987449-12987449	cg26244164	13.7556	0.43	0.0462	DLC1;DLC1	NM_006094;NM_182643	Body;Body
chr8:129886819-129886819	cg14347463	28.3468	0.49	0.0216
chr8:132872558-132872558	cg16815829	15.3863	0.65	0.001
chr8:136702842-136702842	cg15737324	11.5699	0.45	0.0373
chr8:139508813-139508813	cg06010032	13.8686	0.58	0.0051	FAM135B	NM_015912	5'UTR
chr8:143152704-143152704	cg17830011	16.8666	0.57	0.0051
chr8:145174706-145174706	cg05470736	13.5755	0.43	0.0458
chr8:1495169-1495169	cg18803856	12.0734	0.43	0.0458	DLGAP2	NM_004745	5'UTR
chr8:1681408-1681408	cg26170568	10.1576	0.51	0.0155
chr8:1843398-1843398	cg16852369	10.4495	0.57	0.006	ARHGEF10	NM_014629	Body
chr8:19798765-19798765	cg26289317	11.7291	0.58	0.0048	LPL	NM_000237	Body
chr8:24772350-24772350	cg04118306	10.1383	0.45	0.0354	NEFM;NEFM	NM_001105541;NM_005382	TSS200;1stExon
chr8:25895105-25895105	cg03595881	10.2906	0.44	0.0381	EBF2	NM_022659	Body
chr8:29945815-29945815	cg04286307	12.9983	0.44	0.0401
chr8:30366931-30366931	cg26383811	17.2022	0.69	0.0004	RBPMS;RBPMS;RBPMS;RBPMS	NM_001008712;NM_001008710;NM_001008711;NM_006867	Body;Body;Body;Body
chr8:38831332-38831332	cg24312537	14.1208	0.44	0.0387	HTRA4;PLEKHA2	NM_153692;NM_021623	TSS1500;3'UTR
chr8:40010823-40010823	cg21857346	26.6222	0.44	0.0381	C8orf4	NM_020130	TSS200
chr8:41137578-41137578	cg02154585	13.8852	0.49	0.02	SFRP1	NM_003012	Body
chr8:43278783-43278783	cg16864803	23.5475	0.45	0.0375
chr8:4644739-4644739	cg11945167	10.6171	0.48	0.0232	CSMD1	NM_033225	Body
chr8:496327-496327	cg04134279	14.0231	0.43	0.0455	C8orf42	NM_175075	TSS1500
chr8:49804177-49804177	cg00413838	12.2622	0.51	0.0163
chr8:53326618-53326618	cg14689479	16.1541	0.63	0.0015
chr8:58115012-58115012	cg02725872	19.0513	0.45	0.0375
chr8:58950948-58950948	cg07394259	11.2168	0.5	0.0172	FAM110B	NM_147189	5'UTR
chr8:65292217-65292217	cg20047489	22.5596	0.53	0.0116
chr8:70623422-70623422	cg21436572	20.2698	0.58	0.0043	SLCO5A1;SLCO5A1;SLCO5A1	NM_030958;NM_001146009;NM_001146008	Body;Body;Body
chr8:7320520-7320520	cg25542559	11.2875	0.48	0.0237	SPAG11B;SPAG11B;SPAG11B;SPAG11B;SPAG11B	NM_058200;NM_058203;NM_058202;NM_058201;NM_016512	Body;Body;Body;Body;Body
chr8:75263248-75263248	cg05501320	12.3737	0.49	0.0199	GDAP1;GDAP1	NM_018972;NM_001040875	Body;5'UTR
chr8:81805752-81805752	cg02299020	15.27	0.55	0.0087
chr8:85267094-85267094	cg00431317	52.2038	0.58	0.0049	RALYL;RALYL;RALYL;RALYL	NM_173848;NM_001100392;NM_001100393;NM_001100391	5'UTR;5'UTR;5'UTR;Body
chr8:87082023-87082023	cg20982735	11.8175	0.59	0.0038	PSKH2	NM_033126	TSS200
chr8:87522676-87522676	cg11389953	10.9054	0.57	0.0052
chr8:90335066-90335066	cg13518405	10.6308	0.48	0.0232
chr8:90847772-90847772	cg18493113	15.3703	0.57	0.0053
chr8:91960827-91960827	cg00940812	13.9636	-0.55	0.0084	NECAB1	NM_022351	Body
chr8:9472057-9472057	cg20819482	14.8337	0.46	0.0293	TNKS	NM_003747	Body
chr8:96258496-96258496	cg16665383	13.7799	0.42	0.0495	C8orf37	NM_177965	3'UTR
chr8:998428-998428	cg18836844	10.7549	0.42	0.0498
chr9:10371306-10371306	cg13930665	12.0474	0.46	0.0314	PTPRD;PTPRD	NM_002839;NM_130391	5'UTR;5'UTR
chr9:114557239-114557239	cg06643227	13.3702	0.6	0.0032
chr9:114557553-114557553	cg13314167	10.283	0.47	0.0265
chr9:127140111-127140111	cg13610026	11.863	0.44	0.0395	PSMB7	NM_002799	Body
chr9:131465811-131465811	cg07950002	10.0588	0.45	0.0367	PKN3	NM_013355	Body
chr9:131466143-131466143	cg13708974	19.3318	0.49	0.0192	PKN3	NM_013355	Body
chr9:132481736-132481736	cg13610545	12.6301	0.52	0.0137	PRRX2	NM_016307	Body
chr9:134000424-134000424	cg09553448	11.7526	0.44	0.0421	NUP214	NM_005085	TSS1500
chr9:41954479-41954479	cg05760951	11.1365	0.46	0.03	MGC21881	NR_015363	Body
chr9:4488463-4488463	cg16438069	14.5843	0.44	0.0387
chr9:77116084-77116084	cg13939185	14.0135	0.69	0.0003	RORB	NM_006914	Body
chr9:842799-842799	cg01047025	10.4689	0.6	0.0032	DMRT1	NM_021951	Body
chr9:89649348-89649348	cg14286546	20.3114	0.46	0.031	LOC440173	NR_027471	Body
chr9:98173099-98173099	cg21196551	10.2318	0.45	0.0354

## Sheet: Supplemetary Table 3
Overlapping DMRs (highlighted in different colors [none, or yellow]) between age dependent decreased methylation and UC specific methylation in colonic mucosa
Coordinate (GRCh37/hg19)	IlmnID	Control average	UC average	T test	UCSC_RefGene_Name	UCSC_RefGene_Group	UCSC_CpG_Islands_Name	Altered expression in UC according to et. al
chr1:154839813-154839813	cg06221963	28.1138	35.0889	0.0446957	KCNN3	Body		increased
chr1:154839909-154839909	cg09359103				KCNN3	Body								Control: 22 patients with grossly and histologically normal colon mucosa examined in this report
chr1:154839983-154839983	cg16680214				KCNN3	Body								UC: 9 untreated UC patients detailed in ref. 19
chr1:205537837-205537837	cg03585778	23.6491	29.4029	0.00644815	MFSD4	TSS1500	chr1:205537751-205538443
chr1:205539221-205539221	cg15012468				MFSD4	Body	chr1:205537751-205538443
chr1:21877576-21877576	cg12047425	51.7841	64.1283	9.3283e-05	ALPL;ALPL	5'UTR;TSS1500		increased
chr1:21877579-21877579	cg06346857				ALPL;ALPL	5'UTR;TSS1500
chr1:21877592-21877592	cg22506534				ALPL;ALPL	5'UTR;TSS1500
chr10:530805-530805	cg00590260	67.7494	62.1705	0.0525962	DIP2C	Body	chr10:530713-531099
chr10:530951-530951	cg00219169				DIP2C	Body	chr10:530713-531099
chr10:531098-531098	cg09955645				DIP2C	Body	chr10:530713-531099
chr10:531569-531569	cg25712088				DIP2C	Body	chr10:530713-531099
chr12:131171031-131171031	cg05181941	48.4435	52.195	0.0542768			chr12:131171168-131171548
chr12:131171181-131171181	cg05375686						chr12:131171168-131171548
chr12:133177383-133177383	cg27612324						chr12:133177826-133178055
chr12:133177827-133177827	cg23591611						chr12:133177826-133178055
chr15:37170017-37170017	cg00213301	46.6666	41.4901	0.00541917	LOC145845	Body	chr15:37172473-37173018	increased
chr15:37178201-37178201	cg26727768				LOC145845	Body	chr15:37179516-37179782
chr5:475889-475889	cg21159260	61.7391	66.9277	0.0525228	SLC9A3	Body	chr5:476317-476933	increased
chr5:476497-476497	cg06852942				SLC9A3	Body	chr5:476317-476933
chr5:480033-480033	cg19980199				SLC9A3	Body	chr5:481639-482225
chr5:480121-480121	cg06925438				SLC9A3	Body	chr5:481639-482225
chr5:480253-480253	cg10655629				SLC9A3	Body	chr5:481639-482225
chr5:480412-480412	cg01103582				SLC9A3	Body	chr5:481639-482225
chr6:159466054-159466054	cg15217044	38.3715	27.8328	0.00132425	TAGAP;TAGAP;TAGAP;TAGAP;TAGAP;TAGAP	1stExon;5'UTR;5'UTR;1stExon;5'UTR;1stExon		increased
chr6:159466062-159466062	cg05262335				TAGAP;TAGAP;TAGAP;TAGAP;TAGAP;TAGAP	1stExon;5'UTR;5'UTR;1stExon;5'UTR;1stExon
chr7:123484898-123484898	cg15560337	60.4624	55.8137	0.0516879	HYAL4	TSS1500		increased
chr7:123485043-123485043	cg13882046				HYAL4	TSS200
chr7:152063901-152063901	cg27610605	71.4151	77.615	0.017858	MLL3	Body	chr7:152063834-152064080
chr7:152063907-152063907	cg09237454				MLL3	Body	chr7:152063834-152064080
chr7:152064079-152064079	cg19365810				MLL3	Body	chr7:152063834-152064080
chr8:70378645-70378645	cg12181083	32.108	27.0026	0.0189727	SULF1;SULF1	TSS1500;TSS1500		increased
chr8:70378760-70378760	cg07073960				SULF1;SULF1	TSS200;TSS200
Overlapping DMRs (highlighted in different colors [none, or yellow]) between age dependent increased methylation and UC specific methylation in colonic mucosa
Coordinate (GRCh37/hg19)	IlmnID	Control average	UC average	T test	UCSC_RefGene_Name	UCSC_RefGene_Group	UCSC_CpG_Islands_Name	Altered expression in UC according to et. al
chr1:207224388-207224388	cg25594636	11.9691	14.9321	0.0332698	YOD1;YOD1	1stExon;5'UTR	chr1:207224089-207224450
chr1:207224567-207224567	cg23921459				YOD1	TSS200	chr1:207226281-207226842
chr11:128694679-128694679	cg09971562	65.0703	69.339	0.00925024			chr11:128694084-128694688
chr11:128694915-128694915	cg03898448						chr11:128694084-128694688
chr11:299564-299564	cg26152754	53.8308	59.6342	0.00720262	IFITM5	TSS200	chr11:299389-299635
chr11:299629-299629	cg24503261				IFITM5	TSS200	chr11:299389-299635
chr11:299668-299668	cg05733139				IFITM5	TSS200	chr11:299389-299635
chr16:57729104-57729104	cg01813965	70.7738	59.5567	0.0079706	CCDC135	5'UTR
chr16:57729107-57729107	cg09306696				CCDC135	5'UTR
chr18:5196397-5196397	cg22105145	14.6911	18.9611	0.00454624	LOC642597	Body	chr18:5196243-5197389
chr18:5197559-5197559	cg25349154				LOC642597	TSS1500	chr18:5196243-5197389
chr19:50037079-50037079	cg19340420	64.8145	51.8465	0.000218669	RCN3	Body	chr19:50037078-50037670	decreased
chr19:50037085-50037085	cg15963326				RCN3	Body	chr19:50037078-50037670
chr19:58716032-58716032	cg22720790	64.162	69.9375	0.00170876	ZNF274;ZNF274;ZNF274	Body;Body;5'UTR	chr19:58715220-58716033	increased
chr19:58716135-58716135	cg03099728				ZNF274;ZNF274;ZNF274	Body;Body;5'UTR	chr19:58715220-58716033
chr2:176977220-176977220	cg00786305	53.4132	46.7011	0.00113198			chr2:176977284-176977540
chr2:176977285-176977285	cg09615505						chr2:176977284-176977540
chr2:176977374-176977374	cg12504882						chr2:176977284-176977540
chr2:176977773-176977773	cg02164225						chr2:176977284-176977540
chr4:56659985-56659985	cg24495585	46.9238	42.3857	0.0317947			chr4:56659626-56660144
chr4:56660398-56660398	cg19676181						chr4:56659626-56660144
chr5:153852929-153852929	cg03923071	23.8522	30.1054	0.000966558			chr5:153853056-153853551
chr5:153852934-153852934	cg04223553						chr5:153853056-153853551
chr5:153853545-153853545	cg10981651						chr5:153853056-153853551
chr5:174115696-174115696	cg05469346	37.7974	26.9044	0.000642633
chr5:174115735-174115735	cg05672912
chr6:106441441-106441441	cg03942932	58.2626	52.6322	0.046777			chr6:106441986-106442912
chr6:106441618-106441618	cg03830061						chr6:106441986-106442912
chr6:32141257-32141257	cg13071068	39.9542	31.1284	0.00110048	AGPAT1;AGPAT1	5'UTR;5'UTR		decreased
chr6:32146232-32146232	cg11995506				RNF5;AGPAT1;RNF5P1;RNF5	1stExon;TSS1500;Body;5'UTR
chr9:131465811-131465811	cg07950002	50.819	46.4017	0.0202734	PKN3	Body	chr9:131464843-131465830
chr9:131466143-131466143	cg13708974				PKN3	Body	chr9:131464843-131465830

## Sheet: Supplementary Table 4
Overlapping DMRs (highlighted in different colors [none, or yellow]) between age dependent decreased methylation and CD specific methylation in colonic mucosa
Coordinate (GRCh37/hg19)	IlmnID	Control average	CD average	T test	UCSC_RefGene_Name	UCSC_RefGene_Group	UCSC_CpG_Islands_Name		Expression in CD according to et al.
chr1:205537837-205537837	cg03585778	23.6491	27.0328	0.0459468	MFSD4	TSS1500	chr1:205537751-205538443
chr1:205539221-205539221	cg15012468				MFSD4	Body	chr1:205537751-205538443					Control: 22 patients with grossly and histologically normal colon mucosa examined in this report
chr12:131171031-131171031	cg05181941	48.4435	52.3697	0.0154099			chr12:131171168-131171548					UC: 15 untreated CD patients detailed in ref. 19
chr12:131171181-131171181	cg05375686						chr12:131171168-131171548
chr12:133177383-133177383	cg27612324						chr12:133177826-133178055
chr12:133177827-133177827	cg23591611						chr12:133177826-133178055
chr15:37170017-37170017	cg00213301	46.6666	43.481	0.0500894	LOC145845	Body	chr15:37172473-37173018
chr15:37178201-37178201	cg26727768				LOC145845	Body	chr15:37179516-37179782
Overlapping DMRs (highlighted in different colors [none, or yellow]) between age dependent increased methylation and CD specific methylation in colonic mucosa
Coordinate (GRCh37/hg19)	IlmnID	Control average	CD average	T test	UCSC_RefGene_Name	UCSC_RefGene_Group	UCSC_CpG_Islands_Name		Expression in CD according to et al.
chr11:128694679-128694679	cg09971562	65.0703	68.5615	0.0195339			chr11:128694084-128694688
chr11:128694915-128694915	cg03898448						chr11:128694084-128694688
chr2:50575324-50575324	cg02495518	57.4556	63.7556	0.0276934	NRXN1;NRXN1;NRXN1	Body;Body;TSS1500	chr2:50574045-50574817
chr2:50575326-50575326	cg04707706				NRXN1;NRXN1;NRXN1	Body;Body;TSS1500	chr2:50574045-50574817
chr3:10149803-10149803	cg20850873	78.2478	81.9956	0.00727824	C3orf24;C3orf24;C3orf24;C3orf24	1stExon;1stExon;5'UTR;5'UTR	chr3:10149750-10150066
chr3:10149882-10149882	cg13047869				C3orf24;C3orf24;C3orf24;C3orf24	1stExon;1stExon;5'UTR;5'UTR	chr3:10149750-10150066
chr3:10149963-10149963	cg10729496				C3orf24;C3orf24	TSS200;TSS200	chr3:10149750-10150066
chr3:10150065-10150065	cg18621852				C3orf24;C3orf24	TSS200;TSS200	chr3:10149750-10150066
chr3:10150083-10150083	cg15117754				C3orf24;C3orf24	TSS200;TSS200	chr3:10149750-10150066
chr7:63505584-63505584	cg15473066	32.1475	36.4865	0.0162226	ZNF727	TSS1500	chr7:63505977-63506298
chr7:63505791-63505791	cg24975986				ZNF727	TSS200	chr7:63505977-63506298

## Sheet: Supplementary Table 5
Pediatric aging dependent DMRs significantly correlating with Roseburia abundance (at least 2 CpG sites correlated [p<0.1] with the taxon within a DMR)
Coordinate (GRCh37/hg19)	Probe	Roseburia correlation	UCSC_RefGene_Name	UCSC_RefGene_Group	UCSC_CpG_Islands_Name
chr12:131171031-131171031	cg05181941	-0.541835			chr12:131171168-131171548
chr12:131171181-131171181	cg05375686	-0.623095			chr12:131171168-131171548
chr7:152063901-152063901	cg27610605	-0.643163	MLL3	Body	chr7:152063834-152064080
chr7:152063907-152063907	cg09237454	-0.745151	MLL3	Body	chr7:152063834-152064080
chr7:152064079-152064079	cg19365810	-0.719394	MLL3	Body	chr7:152063834-152064080
chr7:94953653-94953653	cg07404485	-0.673103	PON1	Body	chr7:94953769-94953971
chr7:94953680-94953680	cg05342682	-0.641017	PON1	Body	chr7:94953769-94953971
chr7:94953770-94953770	cg04155289	-0.678632	PON1	1stExon	chr7:94953769-94953971
chr7:94954059-94954059	cg01874867	-0.643901	PON1	TSS200	chr7:94953769-94953971
chr7:94954202-94954202	cg04871131	-0.811728	PON1	TSS1500	chr7:94953769-94953971
chr8:145008288-145008288	cg02331830	-0.857409	PLEC1;PLEC1;PLEC1;PLEC1;PLEC1;PLEC1;PLEC1;PLEC1	Body;Body;Body;Body;Body;Body;Body;Body	chr8:145008908-145009407
chr8:145008397-145008397	cg04255391	-0.803672	PLEC1;PLEC1;PLEC1;PLEC1;PLEC1;PLEC1;PLEC1;PLEC1	Body;Body;Body;Body;Body;Body;Body;Body	chr8:145008908-145009407
chr18:77616694-77616694	cg00383167	0.572798
chr18:77616832-77616832	cg14294910	0.60886
chr19:53832577-53832577	cg02258724	0.72281			chr19:53832371-53832578
chr19:53832670-53832670	cg15061569	0.685436			chr19:53832371-53832578
chr3:42306737-42306737	cg17621718	0.605961	CCK	TSS1500	chr3:42306149-42307520
chr3:42306974-42306974	cg11142705	0.667109	CCK	TSS1500	chr3:42306149-42307520
chr4:81128234-81128234	cg22270027	0.732879			chr4:81128229-81128691
chr4:81128845-81128845	cg03441770	0.813047			chr4:81128229-81128691
chr5:134825791-134825791	cg01889143	0.680513			chr5:134825398-134826496
chr5:134825895-134825895	cg24792289	0.745987			chr5:134825398-134826496
chr5:134827218-134827218	cg05191175	0.62252			chr5:134827285-134827644
chr5:153852929-153852929	cg03923071	0.8558			chr5:153853056-153853551
chr5:153852934-153852934	cg04223553	0.716424			chr5:153853056-153853551
chr5:153853545-153853545	cg10981651	0.712327			chr5:153853056-153853551
chr5:37836246-37836246	cg04209913	0.767595	GDNF;GDNF;GDNF	TSS1500;5'UTR;TSS1500	chr5:37836747-37840726
chr5:37848810-37848810	cg04208863	0.724219
chr6:28584103-28584103	cg03682719	0.588498			chr6:28583934-28584289
chr6:28584155-28584155	cg03858673	0.691792			chr6:28583934-28584289
chr7:63505584-63505584	cg15473066	0.554449	ZNF727	TSS1500	chr7:63505977-63506298
chr7:63643958-63643958	cg24711774	0.618066			chr7:63642039-63643802
chr9:114557239-114557239	cg06643227	0.558508			chr9:114557287-114557576
chr9:114557553-114557553	cg13314167	0.614762			chr9:114557287-114557576

## Sheet: Supplementary Table 6
Pediatric aging dependent DMRs significantly correlating with Streptococcus abundance (at least 2 CpG sites correlated [p<0.1] with the taxon within a DMR)
Coordinate (GRCh37/hg19)	Probe	Streptococcus Correlation	UCSC_RefGene_Name	UCSC_RefGene_Group	UCSC_CpG_Islands_Name
chr1:91171013-91171013	cg04567738	-0.801907			chr1:91172102-91172771
chr1:91175627-91175627	cg10621610	-0.818116			chr1:91176404-91176701
chr11:299564-299564	cg26152754	-0.693376	IFITM5	TSS200	chr11:299389-299635
chr11:299629-299629	cg24503261	-0.747412	IFITM5	TSS200	chr11:299389-299635
chr11:299668-299668	cg05733139	-0.586767	IFITM5	TSS200	chr11:299389-299635
chr11:44978644-44978644	cg26677322	-0.753502			chr11:44978615-44979030
chr11:44978881-44978881	cg14223001	-0.739689			chr11:44978615-44979030
chr11:44979029-44979029	cg00792751	-0.69458			chr11:44978615-44979030
chr13:53173507-53173507	cg05335186	-0.841837			chr13:53174028-53174674
chr13:53173898-53173898	cg12458913	-0.625438			chr13:53174028-53174674
chr13:53174319-53174319	cg00495681	-0.702732			chr13:53174028-53174674
chr15:53084679-53084679	cg25402787	-0.720268			chr15:53086629-53086858
chr15:53087316-53087316	cg09481404	-0.553051			chr15:53087211-53087488
chr19:52452317-52452317	cg04645914	-0.665278			chr19:52452316-52452543
chr19:52452447-52452447	cg24886257	-0.623844			chr19:52452316-52452543
chr19:53832577-53832577	cg02258724	-0.696519			chr19:53832371-53832578
chr19:53832670-53832670	cg15061569	-0.582216			chr19:53832371-53832578
chr19:58716032-58716032	cg22720790	-0.900811	ZNF274;ZNF274;ZNF274	Body;Body;5'UTR	chr19:58715220-58716033
chr19:58716135-58716135	cg03099728	-0.80239	ZNF274;ZNF274;ZNF274	Body;Body;5'UTR	chr19:58715220-58716033
chr2:50575324-50575324	cg02495518	-0.642061	NRXN1;NRXN1;NRXN1	Body;Body;TSS1500	chr2:50574045-50574817
chr2:50575326-50575326	cg04707706	-0.717422	NRXN1;NRXN1;NRXN1	Body;Body;TSS1500	chr2:50574045-50574817
chr3:10149882-10149882	cg13047869	-0.583328	C3orf24;C3orf24;C3orf24;C3orf24	1stExon;1stExon;5'UTR;5'UTR	chr3:10149750-10150066
chr3:10149963-10149963	cg10729496	-0.570309	C3orf24;C3orf24	TSS200;TSS200	chr3:10149750-10150066
chr3:10150065-10150065	cg18621852	-0.594625	C3orf24;C3orf24	TSS200;TSS200	chr3:10149750-10150066
chr3:10150083-10150083	cg15117754	-0.799826	C3orf24;C3orf24	TSS200;TSS200	chr3:10149750-10150066
chr4:81128234-81128234	cg22270027	-0.75316			chr4:81128229-81128691
chr4:81128845-81128845	cg03441770	-0.736236			chr4:81128229-81128691
chr5:140501380-140501380	cg13288164	-0.656117	PCDHB4	TSS200	chr5:140502890-140503804
chr5:140506895-140506895	cg23484515	-0.660817			chr5:140502890-140503804
chr5:153852929-153852929	cg03923071	-0.840989			chr5:153853056-153853551
chr5:153852934-153852934	cg04223553	-0.568802			chr5:153853056-153853551
chr5:37836246-37836246	cg04209913	-0.580028	GDNF;GDNF;GDNF	TSS1500;5'UTR;TSS1500	chr5:37836747-37840726
chr5:37848810-37848810	cg04208863	-0.909015
chr6:28584103-28584103	cg03682719	-0.579506			chr6:28583934-28584289
chr6:28584155-28584155	cg03858673	-0.602363			chr6:28583934-28584289
chr6:74072242-74072242	cg20048521	-0.747138	C6orf221	TSS200	chr6:74073294-74073561
chr6:74072320-74072320	cg13001017	-0.671639	C6orf221	TSS200	chr6:74073294-74073561
chr10:530805-530805	cg00590260	0.696194	DIP2C	Body	chr10:530713-531099			TRUE	10:520714-520865	10:530429-530864	Unclassified
chr10:530951-530951	cg00219169	0.671199	DIP2C	Body	chr10:530713-531099			TRUE
chr10:531098-531098	cg09955645	0.569576	DIP2C	Body	chr10:530713-531099			TRUE	10:520967-521373
chr12:131171031-131171031	cg05181941	0.680386			chr12:131171168-131171548				12:129736524-129737489
chr12:131171181-131171181	cg05375686	0.759132			chr12:131171168-131171548				12:129736524-129737489
chr19:20278015-20278015	cg15748470	0.627503	ZNF486	TSS200		low-CpG:20138991-20139022				19:20277699-20278612	Unclassified_Cell_type_specific
chr19:20278051-20278051	cg03570035	0.650646	ZNF486	TSS200						19:20277699-20278612	Unclassified_Cell_type_specific
chr5:475889-475889	cg21159260	0.683176	SLC9A3	Body	chr5:476317-476933					5:474938-476033	Unclassified_Cell_type_specific
chr5:480412-480412	cg01103582	0.565903	SLC9A3	Body	chr5:481639-482225
chr7:152063901-152063901	cg27610605	0.868313	MLL3	Body	chr7:152063834-152064080				7:151694768-151694971
chr7:152063907-152063907	cg09237454	0.90689	MLL3	Body	chr7:152063834-152064080				7:151694768-151694971
chr7:152064079-152064079	cg19365810	0.863863	MLL3	Body	chr7:152063834-152064080
chr7:94953653-94953653	cg07404485	0.573269	PON1	Body	chr7:94953769-94953971			TRUE
chr7:94953680-94953680	cg05342682	0.672606	PON1	Body	chr7:94953769-94953971			TRUE
chr7:94953770-94953770	cg04155289	0.616642	PON1	1stExon	chr7:94953769-94953971			TRUE		7:94953742-94954273	Unclassified_Cell_type_specific
chr7:94954059-94954059	cg01874867	0.556968	PON1	TSS200	chr7:94953769-94953971			TRUE		7:94953742-94954273	Unclassified_Cell_type_specific
chr7:94954202-94954202	cg04871131	0.817753	PON1	TSS1500	chr7:94953769-94953971			TRUE		7:94953742-94954273	Unclassified_Cell_type_specific
chr8:145008288-145008288	cg02331830	0.687665	PLEC1;PLEC1;PLEC1;PLEC1;PLEC1;PLEC1;PLEC1;PLEC1	Body;Body;Body;Body;Body;Body;Body;Body	chr8:145008908-145009407				8:145080274-145080400	8:145007733-145008887	Unclassified	TRUE
chr8:145008397-145008397	cg04255391	0.681629	PLEC1;PLEC1;PLEC1;PLEC1;PLEC1;PLEC1;PLEC1;PLEC1	Body;Body;Body;Body;Body;Body;Body;Body	chr8:145008908-145009407				8:145080274-145080400	8:145007733-145008887	Unclassified	TRUE

## Sheet: Supplemetary Table 7
Shared CpG sites where DNA methylation decrease overlapped between this study and the work of Kraiczy, et al. (Ref 25 of paper)
Coordinate (GRCh37/hg19)	Probe	Methylation change (%)		Spearman r	UCSC_RefGene_Name	UCSC_RefGene_Accession	UCSC_RefGene_Group
chr7:73624373-73624373	cg03000596	-20.4573	229954	-0.44	LAT2;LAT2;LAT2;LAT2;LAT2;LAT2	NM_032463;NM_032464;NM_014146;NM_014146;NM_032463;NM_032464	5'UTR;5'UTR;5'UTR;1stExon;1stExon;1stExon
chr16:27378982-27378982	cg04522310	-11.7009	84264	-0.5	IL4R		promoter
chr11:18270341-18270341	cg12907644	-19.0635	285277	-0.55	SAA2;SAA2	NM_030754;NM_001127380	TSS200;TSS200
chr11:18287647-18287647	cg15484375	-14.4246	286845	-0.51	SAA1;SAA1	NM_199161;NM_000331	TSS200;TSS200
chr14:51760188-51760188	cg22805381	-11.5545	322699	-0.5	TMX1		3'UTR
Shared CpG sites where DNA methylation increase overlapped between this study and the work of Kraiczy, et al. (Ref 25 of paper)
Coordinate (GRCh37/hg19)	Probe	Methylation change (%)	Spearman	p-value	UCSC_RefGene_Name	UCSC_RefGene_Accession	UCSC_RefGene_Group
chr16:56651049-56651049	cg00809164	13.6595	0.5	0.0184	MT1L	NR_001447	TSS1500
chr1:201439001-201439001	cg00962755	15.6677	0.56	0.0065	PHLDA3	NM_012396	TSS1500
chr19:57183016-57183016	cg08158952	15.4778	0.53	0.0106	ZNF835	NM_001005850	Body
chr5:140777503-140777503	cg08491188	11.2344	0.48	0.0245	PCDHGA4;PCDHGA6;PCDHGA1;PCDHGA8;PCDHGB5;PCDHGA5;PCDHGB1;PCDHGB4;PCDHGA3;PCDHGA2;PCDHGB5;PCDHGA7;PCDHGB2;PCDHGB3	NM_018917;NM_018919;NM_018912;NM_032088;NM_018925;NM_018918;NM_018922;NM_003736;NM_018916;NM_018915;NM_032099;NM_018920;NM_018923;NM_018924	Body;Body;Body;Body;TSS200;Body;Body;Body;Body;Body;TSS200;Body;Body;Body
chr11:128694679-128694679	cg09971562	14.4214	0.62	0.0021	KCNJ; FLT1 (flt1 is VEGF receptor)
chr13:26043472-26043472	cg12111714	17.776	0.52	0.0135	ATP8A2	NM_016529	Body
chr5:140501380-140501380	cg13288164	15.2955	0.49	0.0214	PCDHB4	NM_018938	TSS200
chr1:79472408-79472408	cg15084543	14.222	0.52	0.0125	ELTD1;ELTD1	NM_022159;NM_022159	5'UTR;1stExon
chr3:40429014-40429014	cg17264618	13.3102	0.6	0.0032	ENTPD3	NM_001248	5'UTR
chr15:35045695-35045695	cg18920097	15.7723	0.46	0.031	GJD2	NM_020660	Body
chr12:62585467-62585467	cg20010506	13.6503	0.68	0.0005	FAM19A2;FAM19A2	NM_178539;NM_178539	5'UTR;1stExon
chr11:44978644-44978644	cg26677322	19.4312	0.52	0.0128	TP53I11
